# Supplementary material
Source: MDPI journal article supplement (https://www.mdpi.com/search?q=molecules-23-00976)

# Convenient Synthesis of Thiohydantoins, Imidazole-2-thiones and Imidazo [2,1-b]thiazol-4-iums from Polymer-supported $\alpha$ -Acylamino Ketones

Petra Králová<sup>a</sup>, Michal Maloň<sup>b</sup>, Hiroyuki Koshino<sup>c</sup> and Miroslav Soural<sup>d\*</sup>

<sup>a</sup>Department of Organic Chemistry, Faculty of Science, Palacký University, 771 46 Olomouc, Czech Republic

<sup>b</sup> JEOL Ltd., Musashino 3-1-2, Akishima, Tokyo 196-8558, Japan

<sup>c</sup> RIKEN Center for Sustainable Resource Science, Hirosawa 2-1, Wako, Saitama 351-0198, Japan

<sup>d</sup>Institute of Molecular and Translational Medicine, Faculty of Medicine and Dentistry, Palacký University,  
Hněvotínská 5, 779 00, Olomouc, Czech Republic

\*Corresponding author. E-mail: [miroslav.soural@upol.cz](mailto:miroslav.soural@upol.cz)

## Content

|                                         |   |
|-----------------------------------------|---|
| General Information.....                | 2 |
| Experimental Procedures .....           | 3 |
| Analytical Data of Final Compounds..... | 5 |

## General Information

Solvents and chemicals were purchased from Sigma-Aldrich (Milwaukee, WI, [www.sigmaaldrich.com](http://www.sigmaaldrich.com)) and Acros (Geel, Belgium, [www.across.cz](http://www.across.cz)). The Wang resin (100-200 mesh, 1% DVB, 0.9 mmol/g) was obtained from AAPPTec (Louisville, KY, [www.aapptec.com](http://www.aapptec.com)). The synthesis was carried out in plastic reaction vessels (syringes, each equipped with a porous disk) using a manually operated synthesizer (Torvig, Niles, MI, [www.torvig.com](http://www.torvig.com)). All reactions were carried out at ambient temperature (25 °C) unless stated otherwise. The volume of wash solvent was 10 mL per 1 g of resin. For washing, resin slurry was shaken with the fresh solvent for at least 1 min before changing the solvent. Resin-bound intermediates were dried by a stream of nitrogen for prolonged storage and/or quantitative analysis. For the LC/MS analysis, a sample of resin (~5 mg) was treated with TFA in DCM, the cleavage cocktail was evaporated under a stream of nitrogen, and cleaved compounds extracted into MeCN (1 mL).

The LC/MS analyses were carried out on UHPLC-MS system consisting of UHPLC chromatograph Acquity with photodiode array detector and single quadrupole mass spectrometer (Waters), using X-Select C18 column at 30 °C and flow rate of 600  $\mu$ L/min. The mobile phase was (A) 10 mM ammonium acetate in H<sub>2</sub>O, and (B) MeCN, linearly programmed from 20% to 80% B over 2.5 min, kept for 1.5 min. The column was re-equilibrated with 20% of solution B for 1 min. The ESI source operated at discharge current of 5  $\mu$ A, vaporizer temperature of 350 °C and capillary temperature of 200 °C.

Purification was carried out on C18 reverse phase column (YMC Pack ODS-A, 20  $\times$  100 mm, 5  $\mu$ m particles), the gradient was formed from 10 mM aqueous ammonium acetate and MeCN, flow rate 15 mL/min.

For lyophilization of residual solvents (H<sub>2</sub>O, ammonium acetate buffer, DMSO, DMF) the ScanVac Coolsafe 110-4 working at -110 °C was used.

All 1D and 2D NMR experiments were performed with using ECX500 spectrometer (JEOL RESONANCE, Tokyo, Japan) at magnetic field strength of 11.75 T corresponding to <sup>1</sup>H and <sup>13</sup>C resonance frequencies of 500.16 MHz and 125.77 MHz at 27 °C and/or higher temperature (80-140 °C). Chemical shifts ( $\delta$ ) are reported in parts per million (ppm) and coupling constants ( $J$ ) are reported in Hertz (Hz). The signal of DMSO-*d*<sub>6</sub> was set at 2.50 ppm in <sup>1</sup>H NMR spectra and at 39.50

ppm in  $^{13}\text{C}$  NMR spectra.  $^{15}\text{N}$  chemical shifts were referenced to external 90% formamide in  $\text{DMSO-}d_6$  (112.00 ppm) (see Martin, G. E.; Hadden, C. E., Long-Range  $^1\text{H}$ - $^{15}\text{N}$  Heteronuclear Shift Correlation at Natural Abundance. *J. Nat. Prod.* **2000**, 63 (4), 543-585). Acetate salt (residual agent from the semipreparative HPLC purification and/or complexed with ethylmorpholine substituents) exhibited singlet at 1.88 ppm in the  $^1\text{H}$  NMR spectrum and two resonances at 21.55 ppm and 172.20 ppm in  $^{13}\text{C}$  NMR spectrum. The assignment of  $^1\text{H}$ ,  $^{13}\text{C}$  and  $^{15}\text{N}$  signals was done by using  $^{13}\text{C}$  DEPT,  $^1\text{H}$ - $^1\text{H}$  COSY,  $^1\text{H}$ - $^1\text{H}$  NOESY,  $^1\text{H}$ - $^{13}\text{C}$  HSQC,  $^1\text{H}$ - $^{13}\text{C}$  HMBC,  $^1\text{H}$ - $^{15}\text{N}$  HMBC, and  $^1\text{H}$ - $^{15}\text{N}$  HMQC.

Characteristic signals of imidazo[2,1-b]thiazol-4-iums **8**{ $R^1$ ,2-6} are highlighted in red and imidazole-2-thiones **9**{ $R^1$ ,2-6} highlighted in blue in 1D NMR spectra.

HRMS analysis was performed using LC-MS (Dionex Ultimate 3000) with Orbitrap Elite high-resolution mass spectrometer (Thermo Exactive plus, MA, USA) operating at positive full scan mode (120 000 FWHM) in the range of 100-1000 m/z. The settings for electrospray ionization were as follows: oven temperature of 150 °C and the source voltage of 3.6 kV. The acquired data were internally calibrated with diisooctylphthalate as a contaminant in MeOH (m/z 297.15909). Samples were diluted to a final concentration of 0.1 mg/mL in MeCN. Before HPLC separation (column Phenomenex Gemini, 50 × 2.00 mm, 3  $\mu\text{m}$  particles, C18), the samples were injected using direct infusion into the mass spectrometer using autosampler. The mobile phase was isocratic MeCN/10 mM ammonium acetate (80:20) and flow 0.3 mL/min.

## Experimental Procedures

Synthesis of  $\alpha$ -acylamino ketones **1**{ $R^1$ } was performed starting polymer-supported Fmoc-Ser(*t*Bu)-OH according previously reported procedures (see Králová, P.; Fülöpová, V.; Maloň, M.; Volná, T.; Popa, I.; Soral, M. Stereoselective Polymer-Supported Synthesis of Morpholine- and Thiomorpholine-3-Carboxylic Acid Derivatives. *ACS Comb. Sci.* **2017**, 19 (3), 173-180).

### 1. Preparation of thioureas: **2**{ $R^1$ , $R^2$ }

*N*-unsubstituted derivatives: Fmoc-Cl (388 mg, 1.5 mmol) and KSCN (146 mg, 1.5 mmol) in anhydrous THF (5 mL) was stirred 24 h at room temperature and the solution of resulting Fmoc-isothiocyanate was filtrated using microfilter. Then the resin **1**{ $R^1$ } (500 mg), pre-washed three

times with anhydrous THF, was added to the solution. After shaking 2 h at room temperature, the resin  $2\{R^1, 1\}$  was washed three times with THF and five times with DCM.

N-alkyl derivatives: The resin  $1\{R^1\}$  (500 mg) was washed three times with DCM and three times with anhydrous THF and a solution of alkyl-isothiocyanate (1.5 mmol) in anhydrous THF (5 mL) was added. After 44 h at room temperature (or 20 h for derivatives  $2\{R^1, 2\}$  and 72 h for derivatives  $2\{R^1, 5\}$ ), the resin was washed three times with THF and three times with DCM.

## **2. Cleavage of the Fmoc-protecting group and cyclative cleavage: $3\{R^1, 1\}$**

To the resin  $2\{R^1, 1\}$  (500 mg) 5 mL of 35% piperidine in DMF (or 10% for derivative  $2\{4, 1\}$ ) was added and the resin was shaken for 24 h at room temperature. Then the resin was washed five times with 5% piperidine/DMF (5 mL) and combined washes containing product  $3\{R^1, 1\}$  were lyophilized overnight.

## **3. Removal of the *t*Bu-protecting group and spontaneous dehydration: $6\{R^1, 1\}$**

The crude lyophilized compounds  $3\{R^1, 1\}$  were dissolved in neat TFA (2 mL) and heated for 20 h at 35 °C. Then the reaction mixture was evaporated to dryness using a stream of nitrogen.

## **4. TES reduction: $7\{R^1, 1\}$**

To the crude derivatives  $6\{R^1, 1\}$  the mixture of TFA/TES/DCM (5:3:5, 3.9 mL) was added and shaken for 24 h at room temperature. The solvents and reagents were evaporated to dryness using a stream of nitrogen, the residual material was dissolved in acetonitrile and purified using semipreparative HPLC.

## **5. Acid-mediated cyclization: $8\{R^1, 2-6\}$**

To the resin  $2\{R^1, 2-6\}$  (500 mg) neat TFA (5 mL) was added and the mixture was heated for 20 h at 80 °C (or 48 h for derivatives  $2\{R^1, 3\}$ ). The resulting solution containing products  $8\{R^1, 2-6\}$  was filtrated using a syringe with porous disk and the resin was washed five times with fresh cleaving cocktail (2 mL). Combined washes were evaporated to dryness using a stream of nitrogen, the resulting material was dissolved in acetonitrile and purified using semipreparative HPLC.

## 6. Conversion of imidazo[2,1-b]thiazol-4-iums to imidazole-2-thiones: **8**{*R*<sup>1</sup>,2-6} to **9**{*R*<sup>1</sup>,2-6}

Purified compounds **8**{*R*<sup>1</sup>,2-6} were dissolved in DMSO-*d*<sub>6</sub> (600 μL) and submitted to 1D NMR spectrometry at 27 °C to collect the NMR data for **8**{*R*<sup>1</sup>,2-6}. Then the samples were heated for 30 min at 120 °C and measured after cooling to 27 °C to collect NMR data for **9**{*R*<sup>1</sup>,2-6}.

### Analytical Data of Final Compounds

#### 5-methylene-1-(2-oxo-2-phenylethyl)-2-thioxoimidazolidin-4-one **6**{1,1}

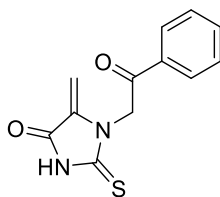

Creme amorphous solid, 7.3 mg (11%, 0.026 mmol). Cleaved from 724.8 mg of resin **2**{1,1} (0.475 mmol/g, 0.344 mmol of substrate). HPLC purity 98%. <sup>1</sup>H NMR (500 MHz, DMSO-*d*<sub>6</sub>): δ = 12.50 (br. s, 1H), 8.06-8.09 (m, 2H), 7.71-7.75 (m, 1H), 7.58-7.62 (m, 2H), 5.59 (s, 2H), 5.35 (d, *J* = 2.9 Hz, 1H), 5.32 (d, *J* = 2.9 Hz, 1H). <sup>13</sup>C NMR (126 MHz, DMSO-*d*<sub>6</sub>): δ = 191.41, 179.15, 163.40, 136.93, 134.24, 134.09, 128.89, 128.11, 98.20, 49.39. HRMS (ESI-TOF, pos.): *m/z* calcd for C<sub>12</sub>H<sub>11</sub>N<sub>2</sub>O<sub>2</sub>S [M+H]<sup>+</sup> 247.0536, found 247.0535.

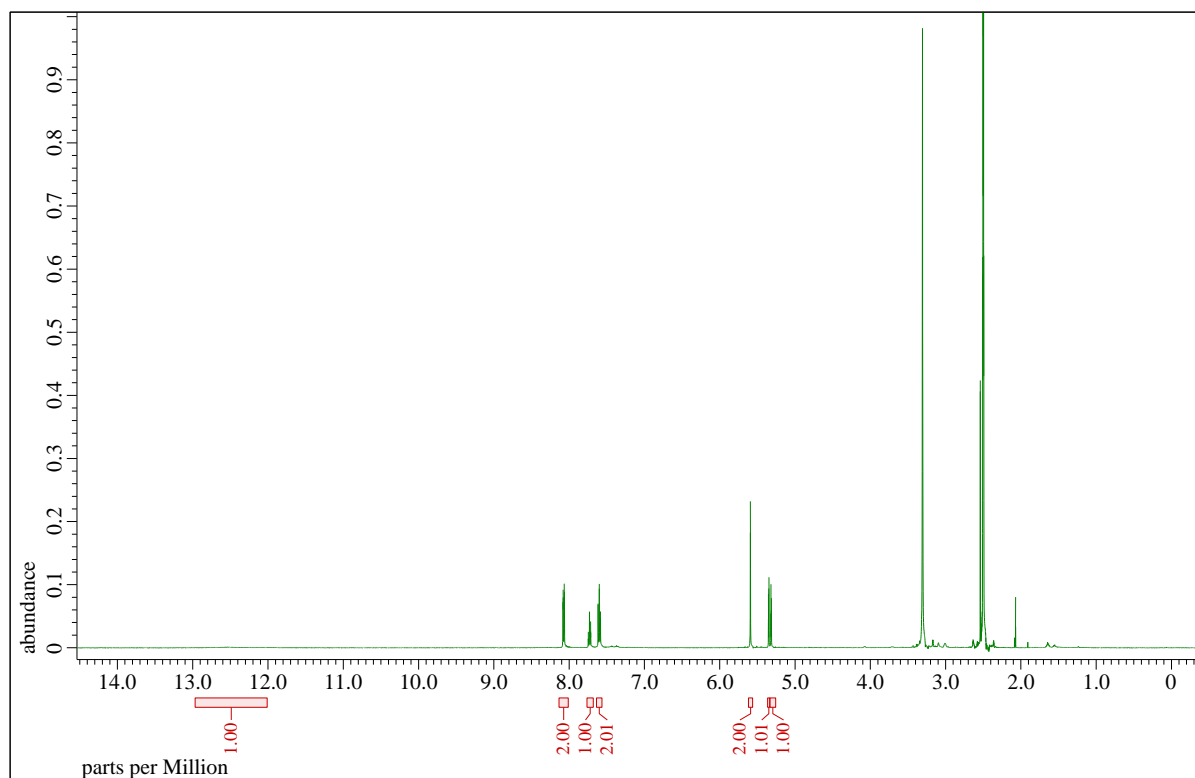

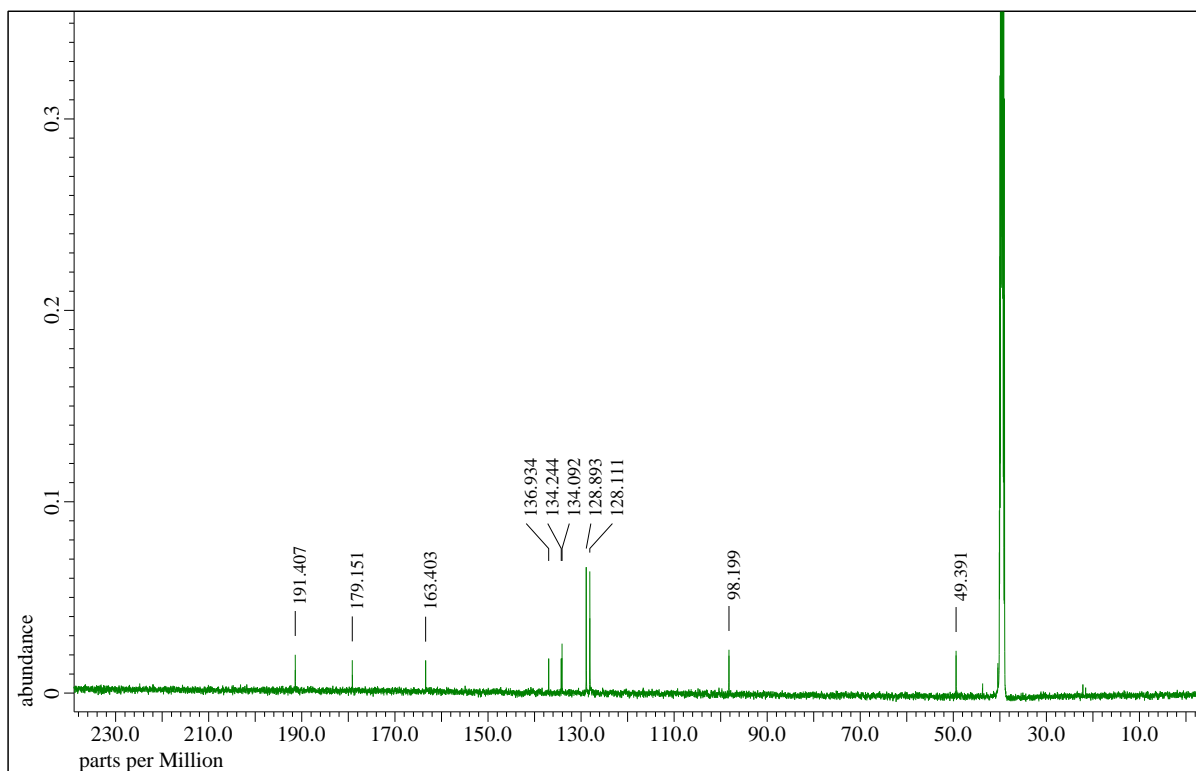

**1-(2-(4-fluorophenyl)-2-oxoethyl)-5-methylene-2-thioxoimidazolidin-4-one 6{4,1}**

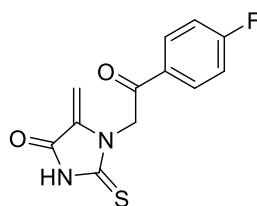

Crème amorphous solid, 6.9 mg (11%, 0.026 mmol). Cleaved from 505.7 mg of resin **2{4,1}** (0.460 mmol/g, 0.233 mmol of substrate). HPLC purity 98%.  $^1\text{H}$  NMR (500 MHz,  $\text{DMSO-}d_6$ ):  $\delta$  = 12.61 (br. s, 1H), 8.07 (br. dd,  $J$  = 8.9, 5.5 Hz, 2H), 7.42 (br. dd,  $J$  = 8.9, 8.9 Hz, 2H), 5.58 (s, 2H), 5.35 (d,  $J$  = 2.8 Hz, 1H), 5.31 (d,  $J$  = 2.8 Hz, 1H).  $^{13}\text{C}$  NMR (126 MHz,  $\text{DMSO-}d_6$ ):  $\delta$  = 190.10, 179.15, 165.49 (d,  $J$  = 253.1 Hz), 163.38, 136.91, 131.26 (d,  $J$  = 9.6 Hz), 131.02 (d,  $J$  = 2.4 Hz), 115.99 (d,  $J$  = 22.8 Hz), 98.20, 49.33. HRMS (ESI-TOF, pos.):  $m/z$  calcd for  $\text{C}_{12}\text{H}_{10}\text{FN}_2\text{O}_2\text{S}$   $[\text{M}+\text{H}]^+$  265.0442, found 265.0439.

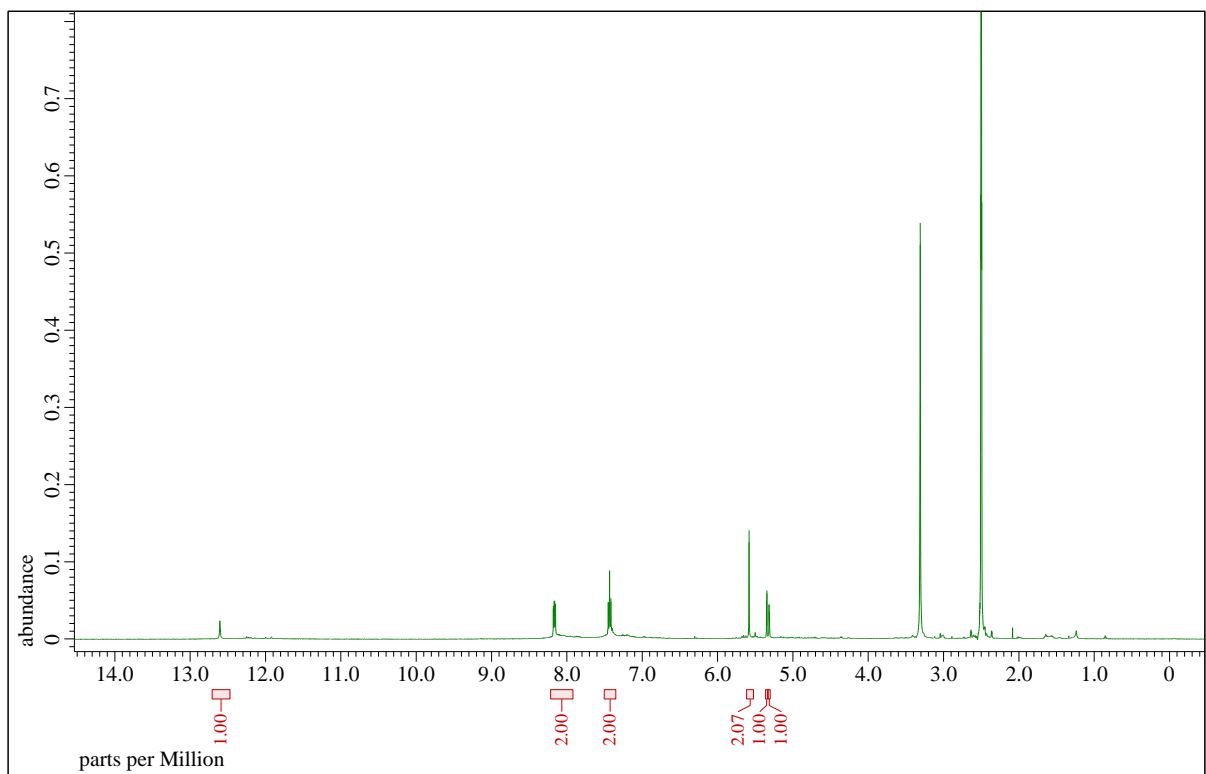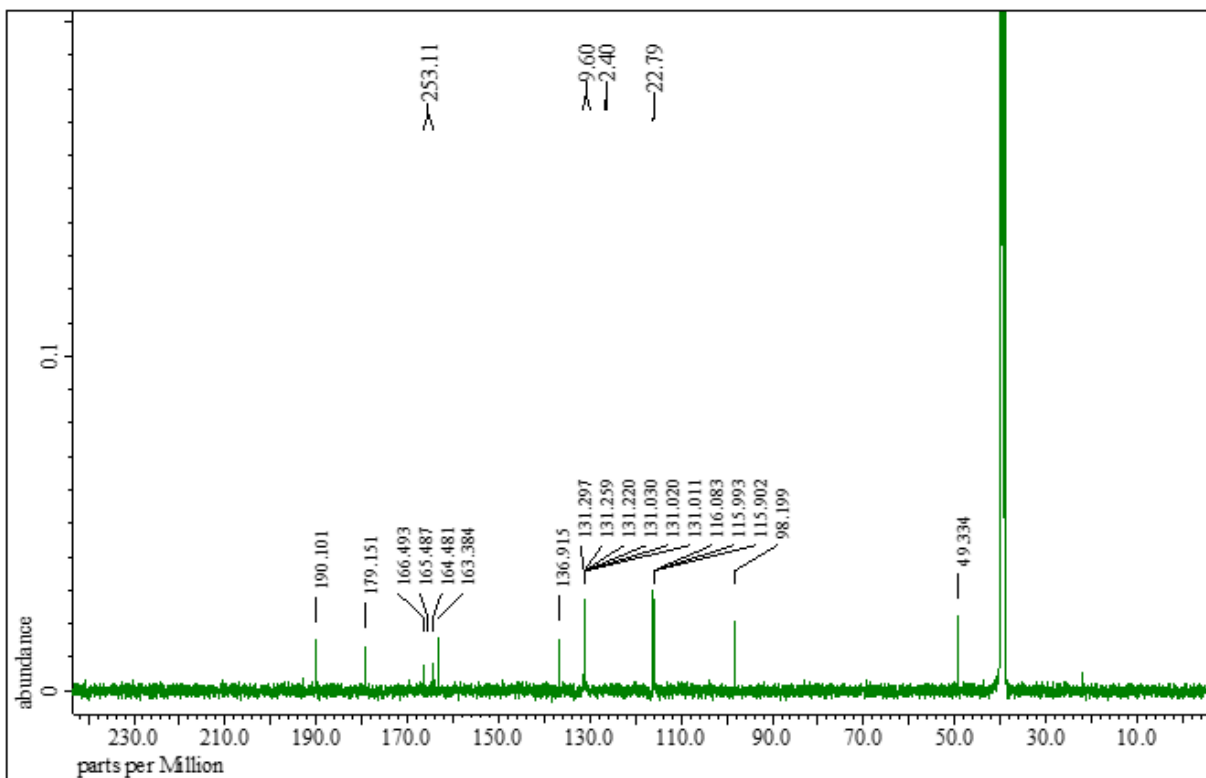

**1-(2-(4-bromophenyl)-2-oxoethyl)-5-methylene-2-thioxoimidazolidin-4-one 6{5,1}**

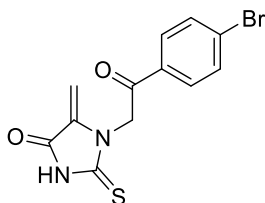

Creme amorphous solid, 6.0 mg (7%, 0.019 mmol). Cleaved from 546.6 mg of resin **2{5,1}** (0.503 mmol/g, 0.275 mmol of substrate). HPLC purity 97%.  $^1\text{H}$  NMR (500 MHz,  $\text{DMSO-}d_6$ ):  $\delta$  = 12.61 (br. s, 1H), 8.01 (br. d,  $J$  = 8.6 Hz, 2H), 7.82 (br. d,  $J$  = 8.6 Hz, 2H), 5.57 (s, 2H), 5.35 (d,  $J$  = 2.8 Hz, 1H), 5.30 (d,  $J$  = 2.8 Hz, 1H).  $^{13}\text{C}$  NMR (126 MHz,  $\text{DMSO-}d_6$ ):  $\delta$  = 190.85, 179.12, 163.36, 136.89, 133.23, 131.98, 130.11, 128.25, 98.24, 49.37. HRMS (ESI-TOF, neg.):  $m/z$  calcd for  $\text{C}_{12}\text{H}_8\text{BrN}_2\text{O}_2\text{S}$   $[\text{M-H}]^-$  322.9484, found 322.9483.

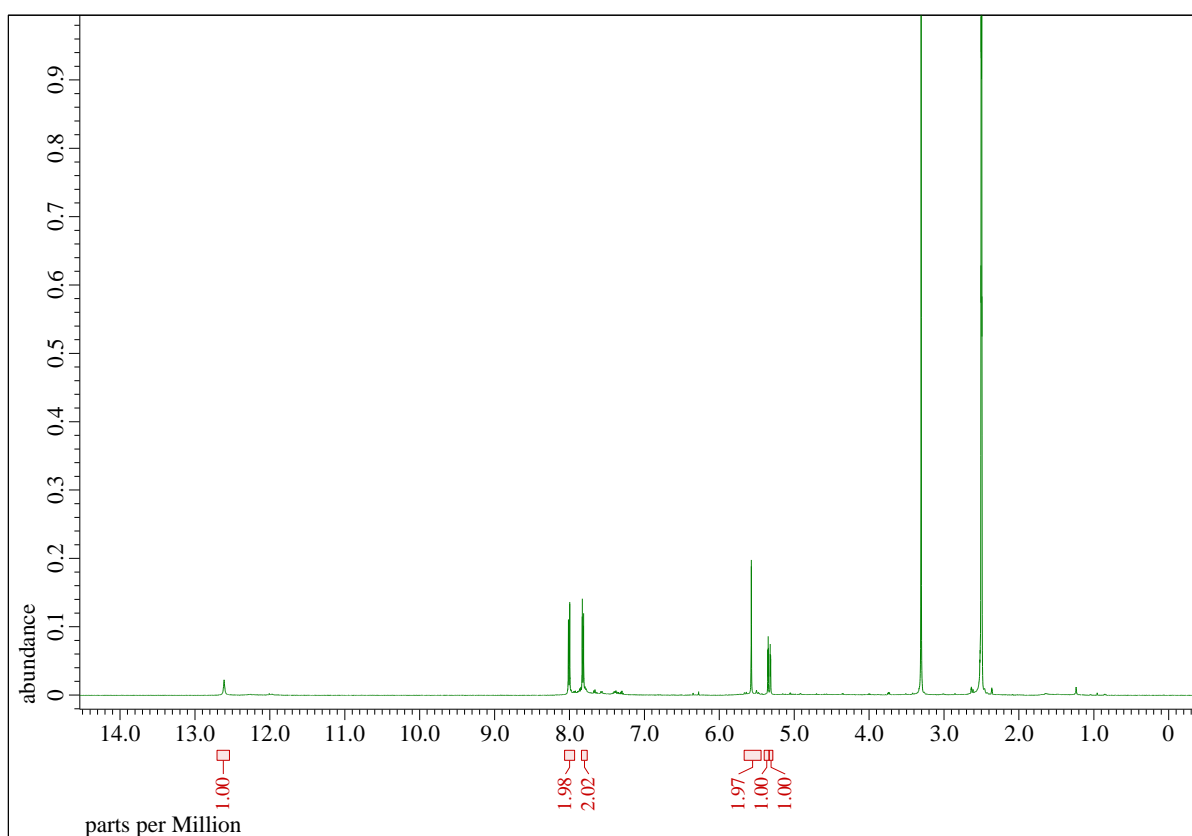



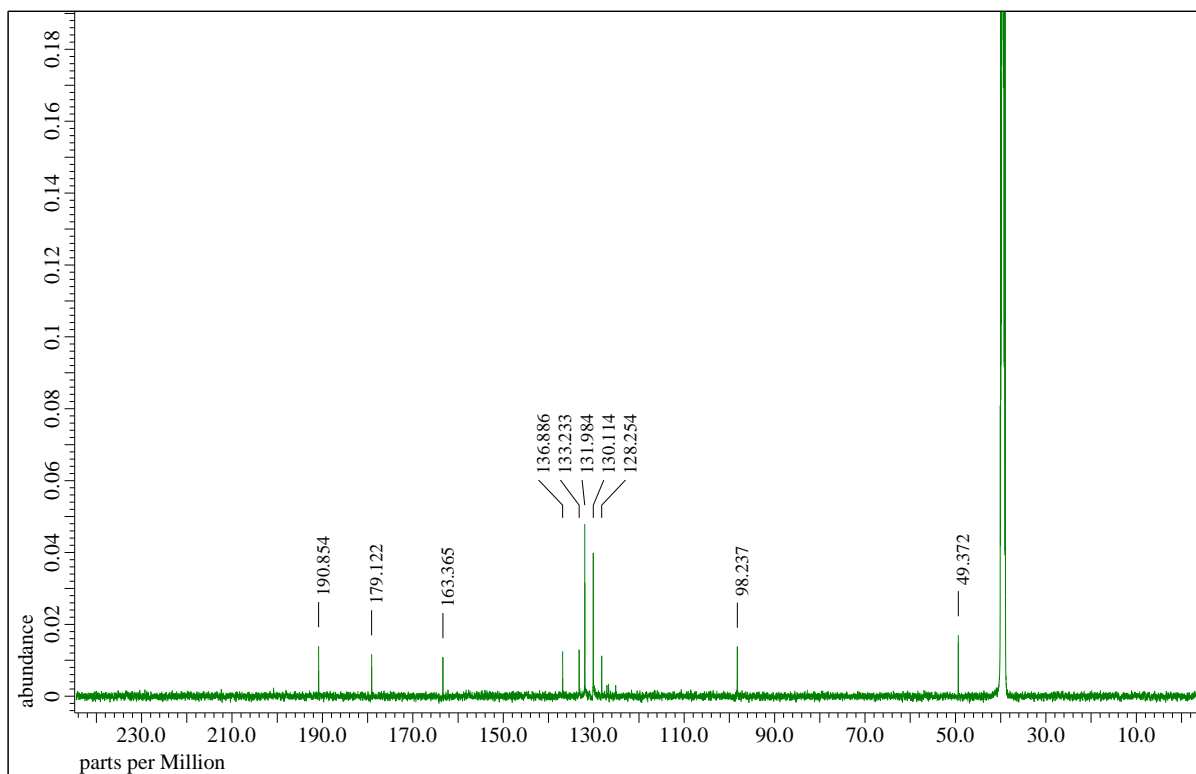

**1-(2-(4-amino-3,5-dichlorophenyl)-2-oxoethyl)-5-methylene-2-thioxoimidazolidin-4-one**  
**6{6,1}**

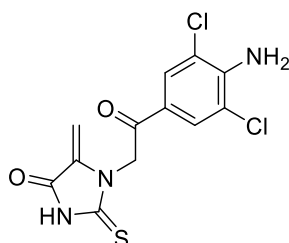

Creme amorphous solid, 7.8 mg (8%, 0.024 mmol). Cleaved from 490.8 mg of resin **2{6,1}** (0.460 mmol/g, 0.226 mmol of substrate). HPLC purity 98%.  $^1\text{H}$  NMR (500 MHz,  $\text{DMSO-}d_6$ ):  $\delta$  = 12.52 (br. s, 1H), 7.94 (s, 2H), 6.60 (br. s, 2H), 5.47 (s, 2H), 5.31 (d,  $J$  = 2.8 Hz, 1H), 5.24 (d,  $J$  = 2.8 Hz, 1H).  $^{13}\text{C}$  NMR (126 MHz,  $\text{DMSO-}d_6$ ):  $\delta$  = 187.54, 179.15, 163.39, 146.19, 136.94, 128.52, 122.60, 117.33, 98.04, 48.79. HRMS (ESI-TOF, pos.):  $m/z$  calcd for  $\text{C}_{12}\text{H}_{10}\text{Cl}_2\text{N}_3\text{O}_2\text{S}$   $[\text{M}+\text{H}]^+$  329.9865, found 329.9863.

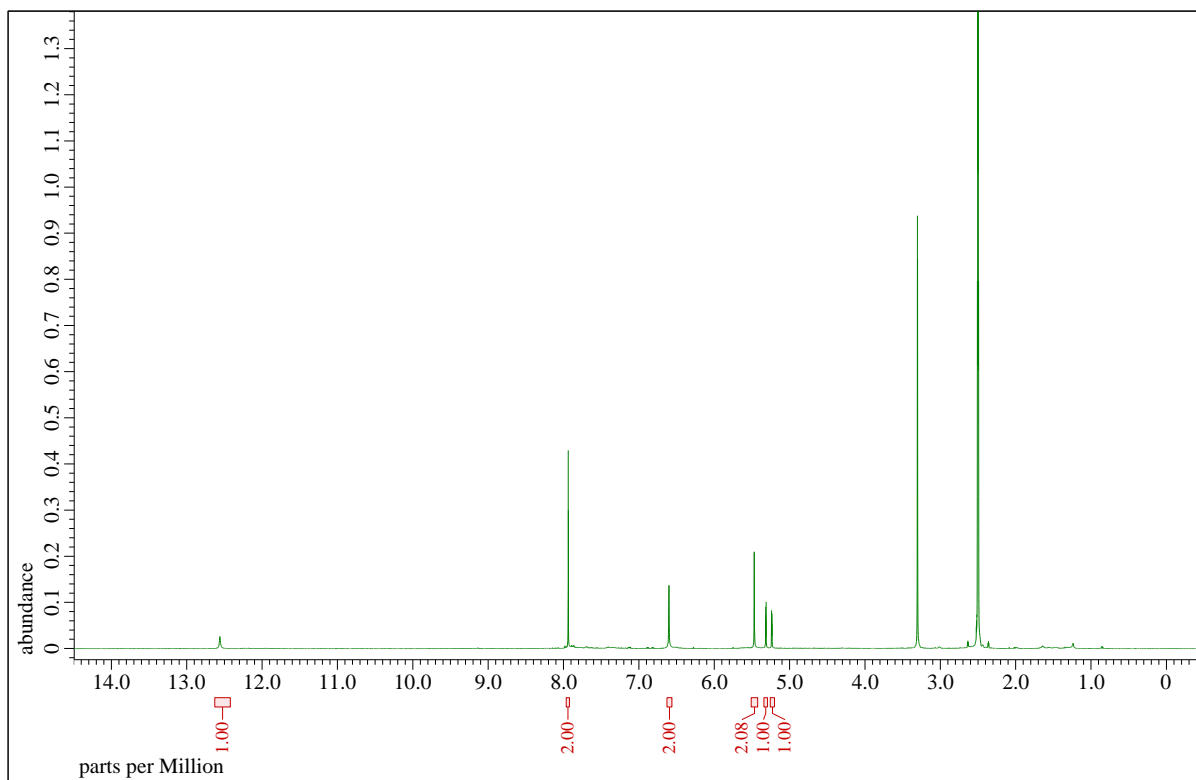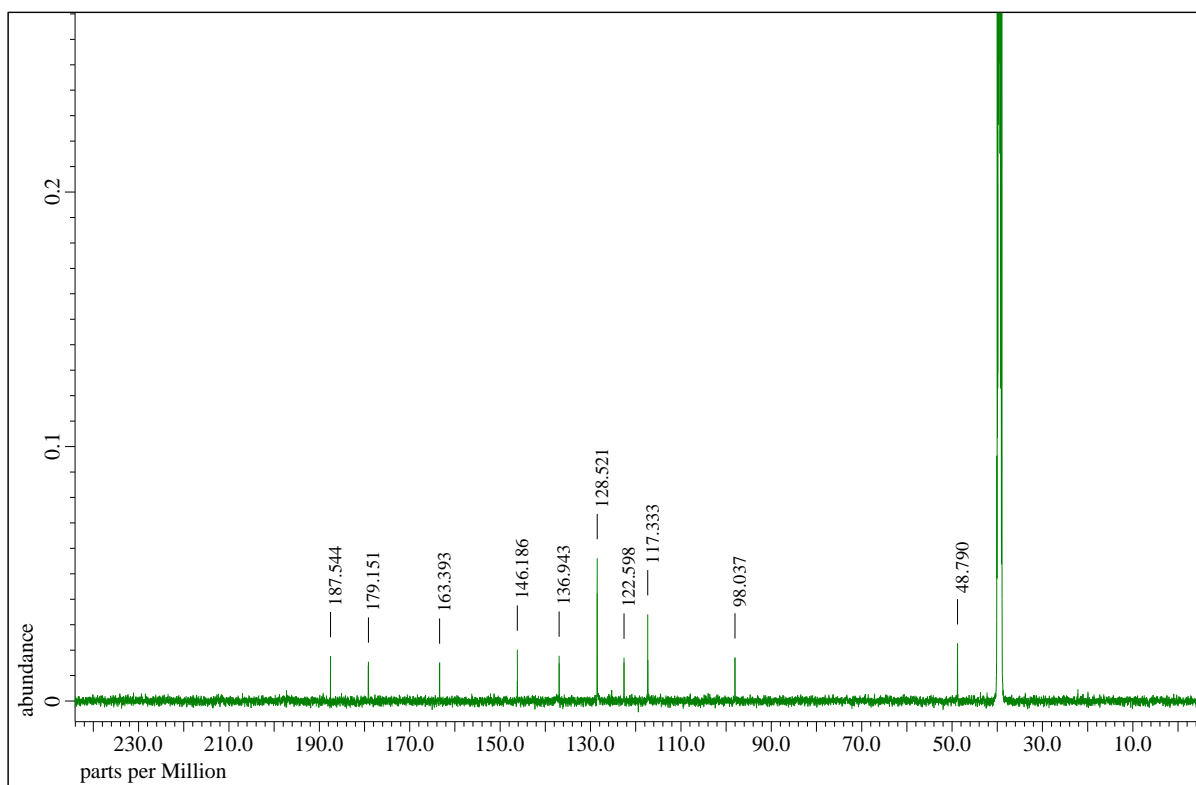

**5-methylene-1-(2-oxo-2-(thiophen-3-yl)ethyl)-2-thioxoimidazolidin-4-one 6{7,1}**

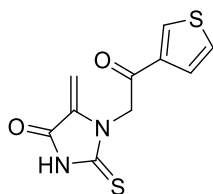

Creme amorphous solid, 7.9 mg (8%, 0.032 mmol). Cleaved from 749.1 mg of resin **2{7,1}** (0.503 mmol/g, 0.377 mmol of substrate). HPLC purity 97%.  $^1\text{H}$  NMR (500 MHz,  $\text{DMSO-}d_6$ ):  $\delta$  = 12.58 (br. s, 1H), 8.74 (dd,  $J$  = 2.8, 1.3 Hz, 1H), 7.71 (dd,  $J$  = 5.1, 2.8 Hz, 1H), 7.58 (dd,  $J$  = 5.1, 1.3 Hz, 1H), 5.48 (s, 2H), 5.34 (d,  $J$  = 2.8 Hz, 1H), 5.29 (d,  $J$  = 2.8 Hz, 1H).  $^{13}\text{C}$  NMR (126 MHz,  $\text{DMSO-}d_6$ ):  $\delta$  = 185.87, 179.13, 163.37, 138.84, 136.93, 134.71, 127.85, 126.36, 98.12, 49.63. HRMS (ESI-TOF, neg.):  $m/z$  calcd for  $\text{C}_{10}\text{H}_7\text{N}_2\text{O}_2\text{S}_2$   $[\text{M-H}]^-$  250.9943, found 250.9951.

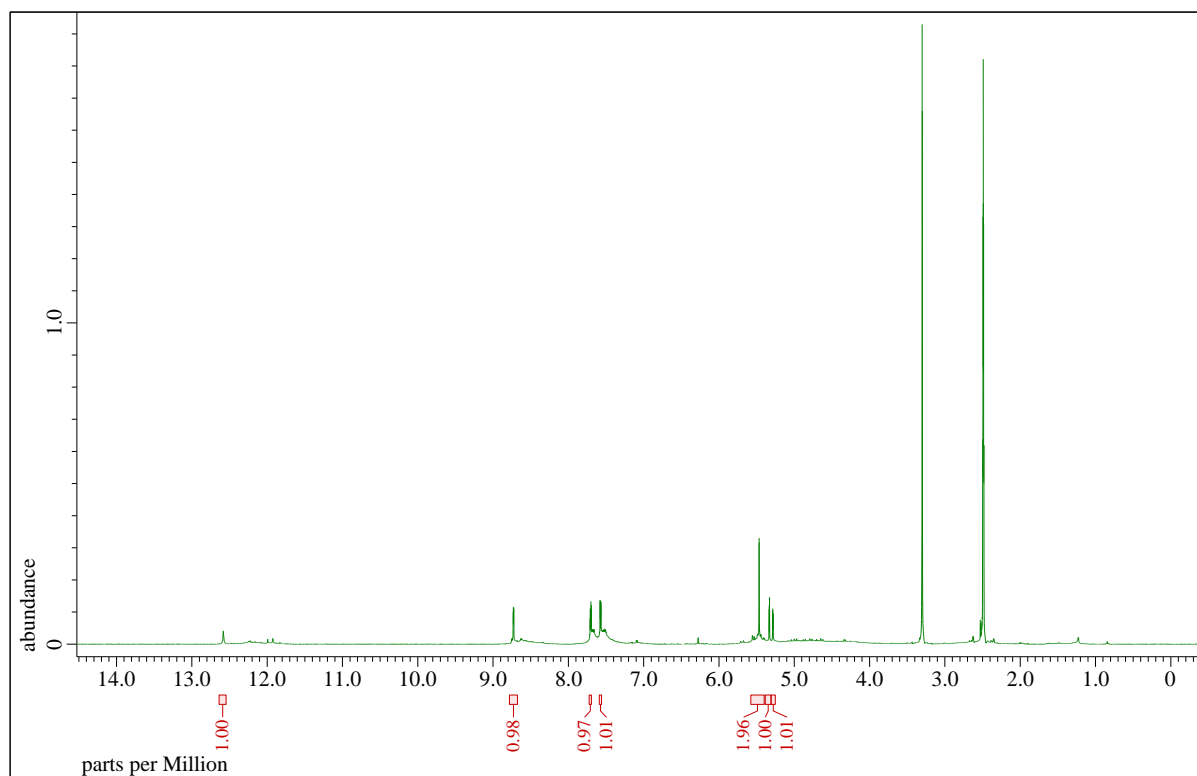

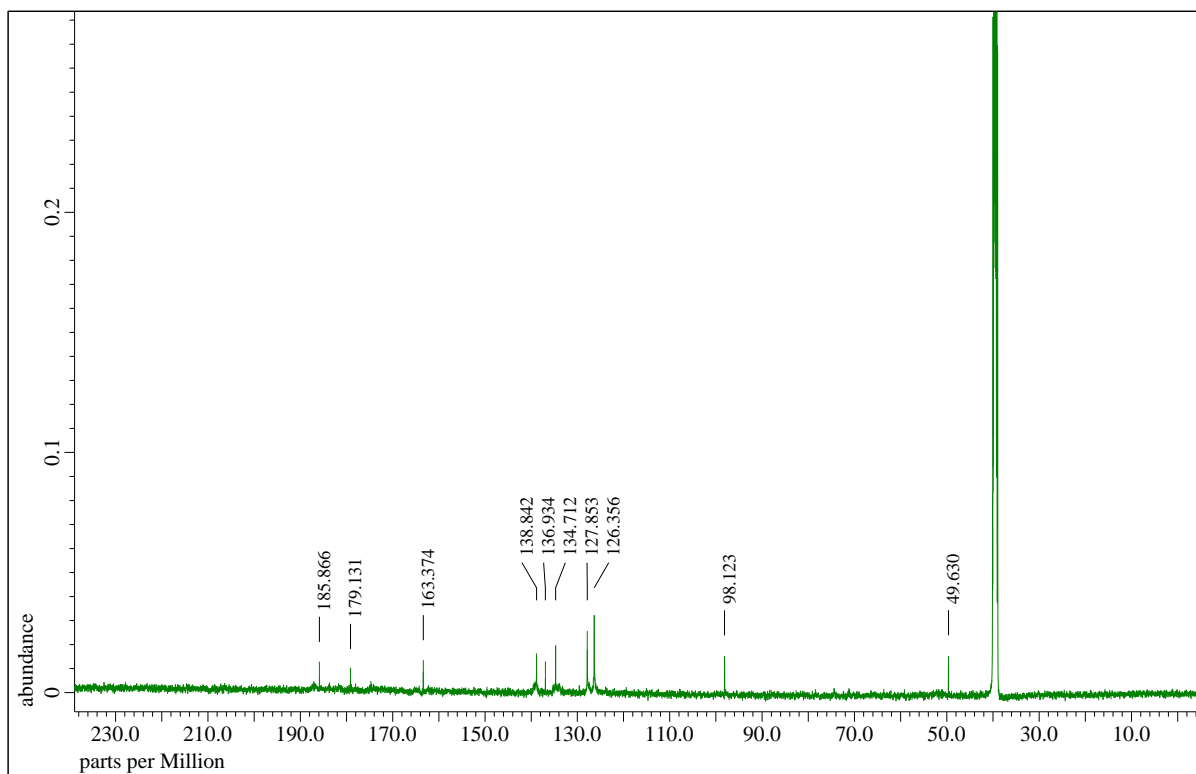

**(5S)-5-methyl-1-(2-oxo-2-phenylethyl)-2-thioxoimidazolidin-4-one 7{1,1}**

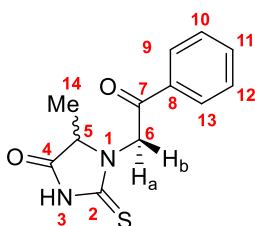

White amorphous solid, 23.0 mg (19%, 0.093 mmol). Cleaved from 1 029.0 mg of resin **2{1,1}** (0.475 mmol/g, 0.489 mmol of substrate). HPLC purity 99%.  $^1\text{H}$  NMR (500 MHz,  $\text{DMSO-}d_6$ ):  $\delta$  = 12.06 (br. s, 1H,  $\text{HN}^3$ ), 8.02-8.05 (m, 2H,  $\text{HC}^{9,13}$ ), 7.69-7.73 (m, 1H,  $\text{HC}^{11}$ ), 7.56-7.60 (m, 2H,  $\text{HC}^{10,12}$ ), 5.42 (d,  $J$  = 18.2 Hz, 1H,  $\text{H}_a\text{C}^6$ ), 5.14 (d,  $J$  = 18.2 Hz, 1H,  $\text{H}_b\text{C}^6$ ), 4.31 (q,  $J$  = 7.1 Hz, 1H,  $\text{HC}^5$ ), 1.35 (d,  $J$  = 7.1 Hz, 3H,  $\text{HC}^{14}$ ).  $^{13}\text{C}$  NMR (126 MHz,  $\text{DMSO-}d_6$ ):  $\delta$  = 192.90 (C7), 182.43 (C2), 175.66 (C4), 134.50 (C8), 134.02 (C11), 128.95 (C10,12), 128.02 (C9,13), 60.01 (C5), 50.36 (C6), 14.54 (C14).  $^{15}\text{N}$  NMR (51 MHz,  $\text{DMSO-}d_6$ ):  $\delta$  = 167.0 (N3), 130.6 (N1). HRMS (ESI-TOF, pos.):  $m/z$  calcd for  $\text{C}_{12}\text{H}_{13}\text{N}_2\text{O}_2\text{S}$   $[\text{M}+\text{H}]^+$  249.0692, found 249.0692.

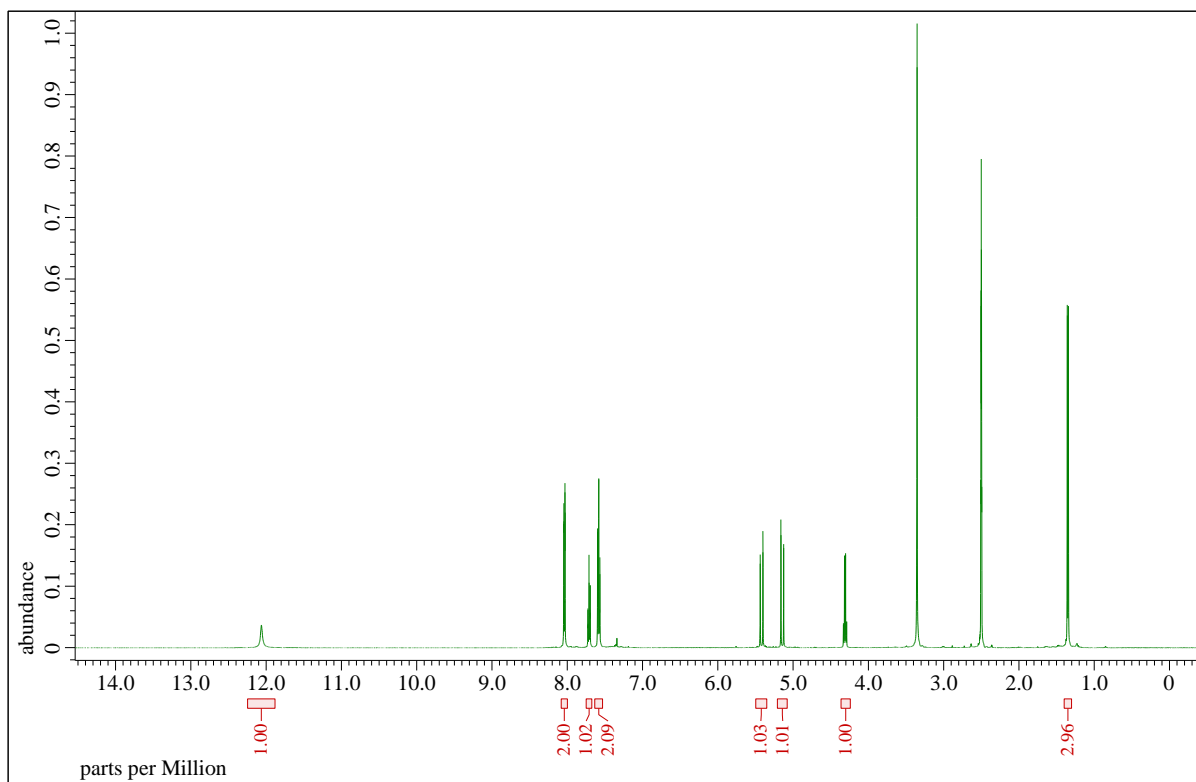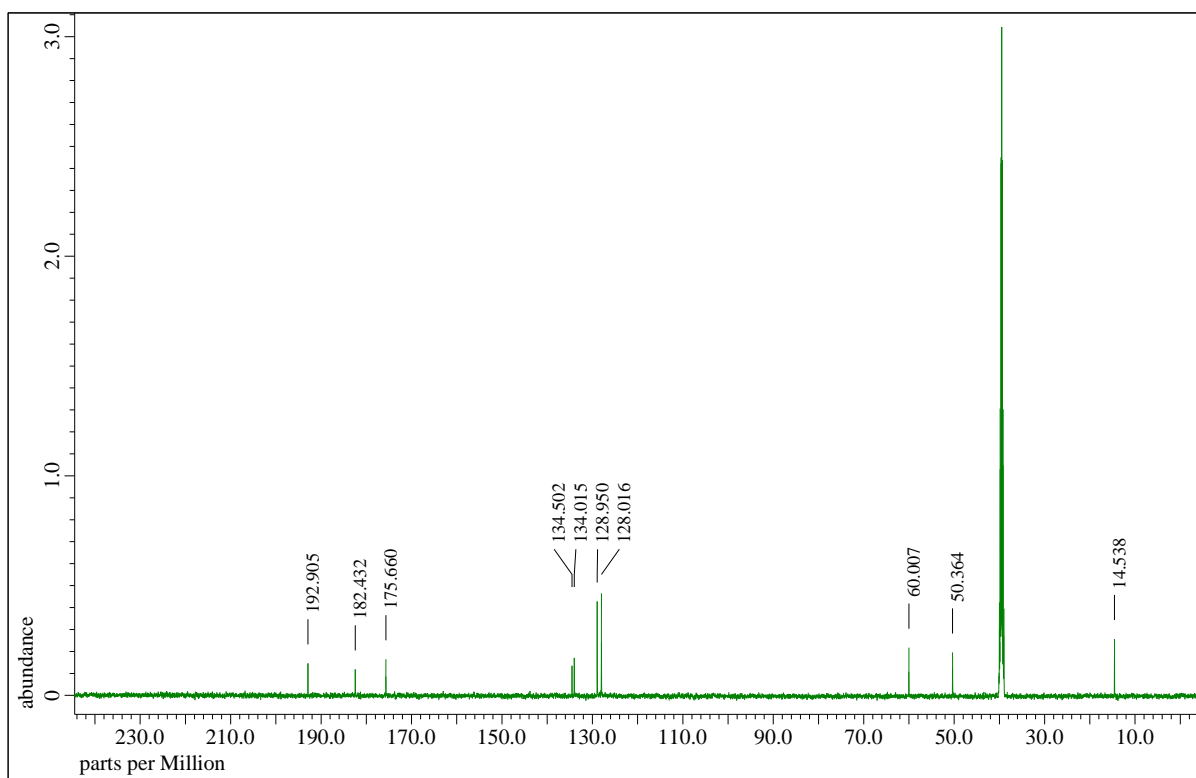

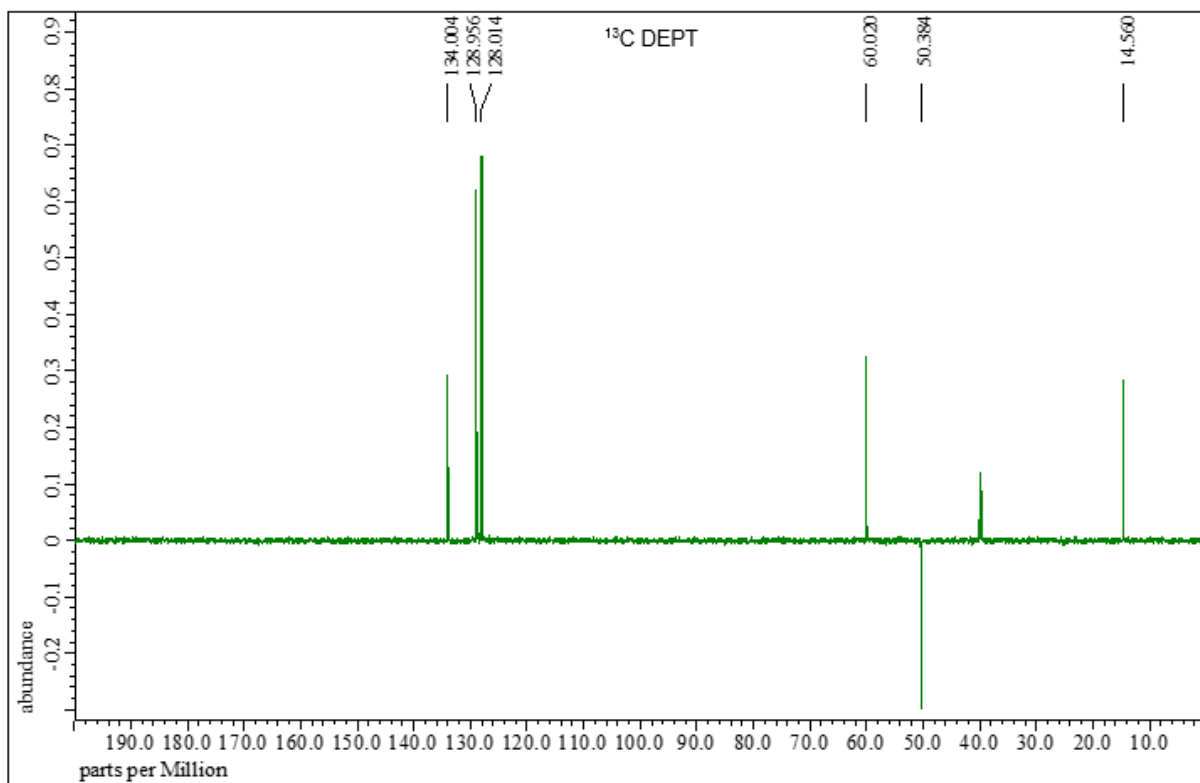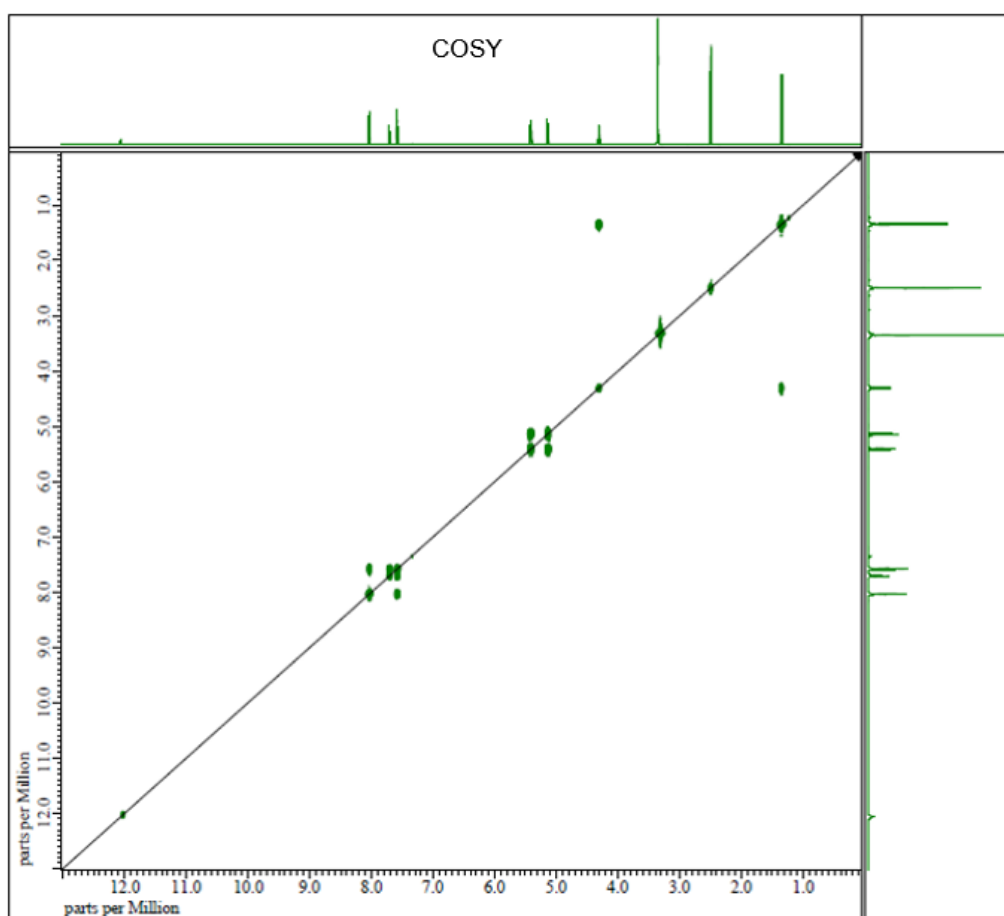

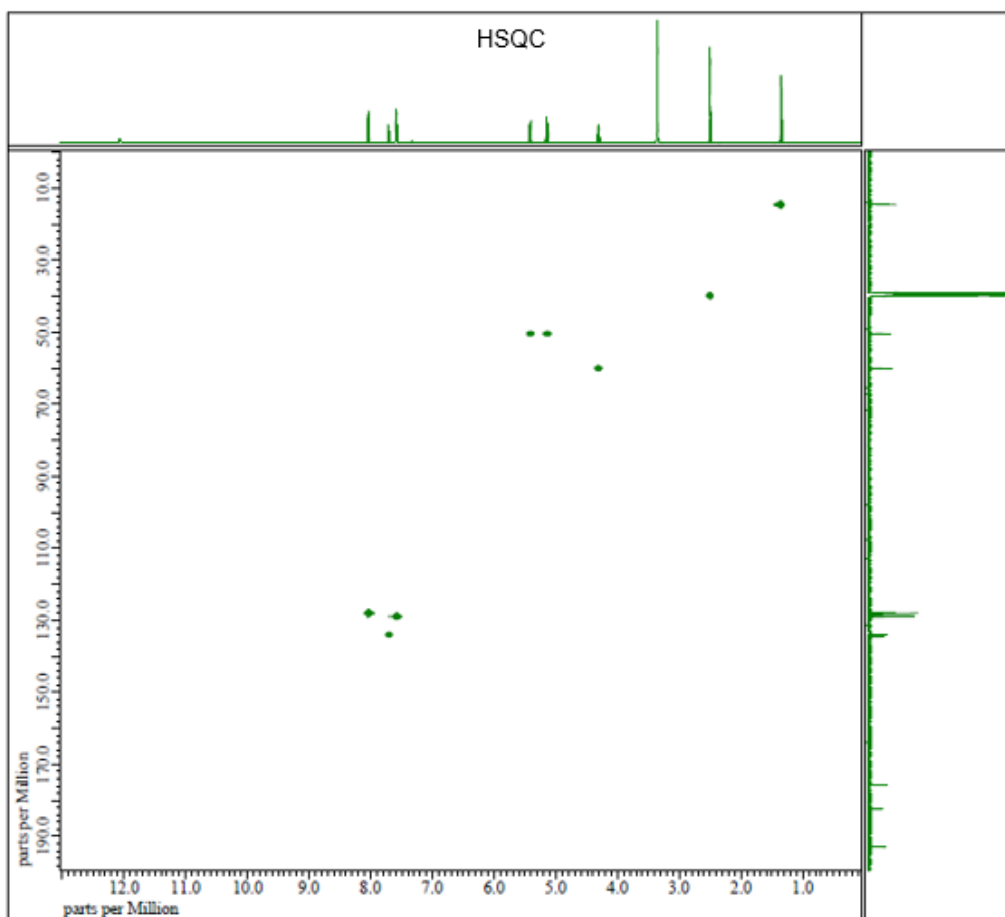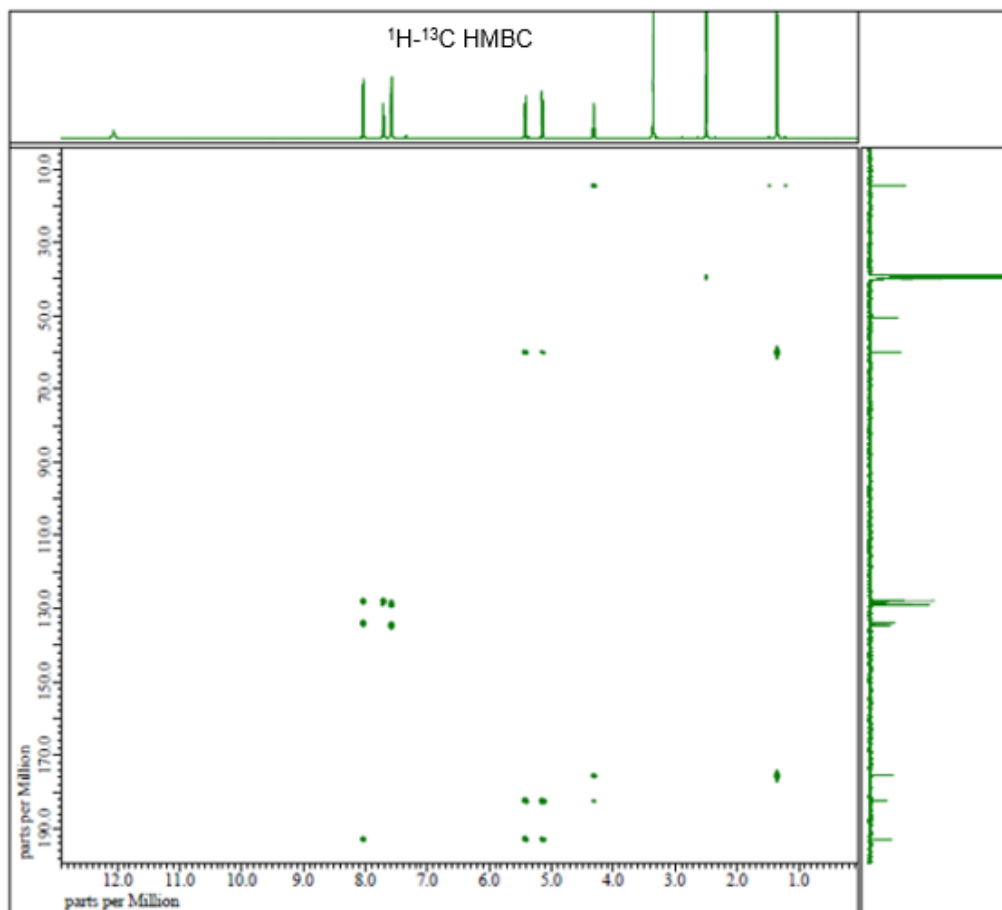

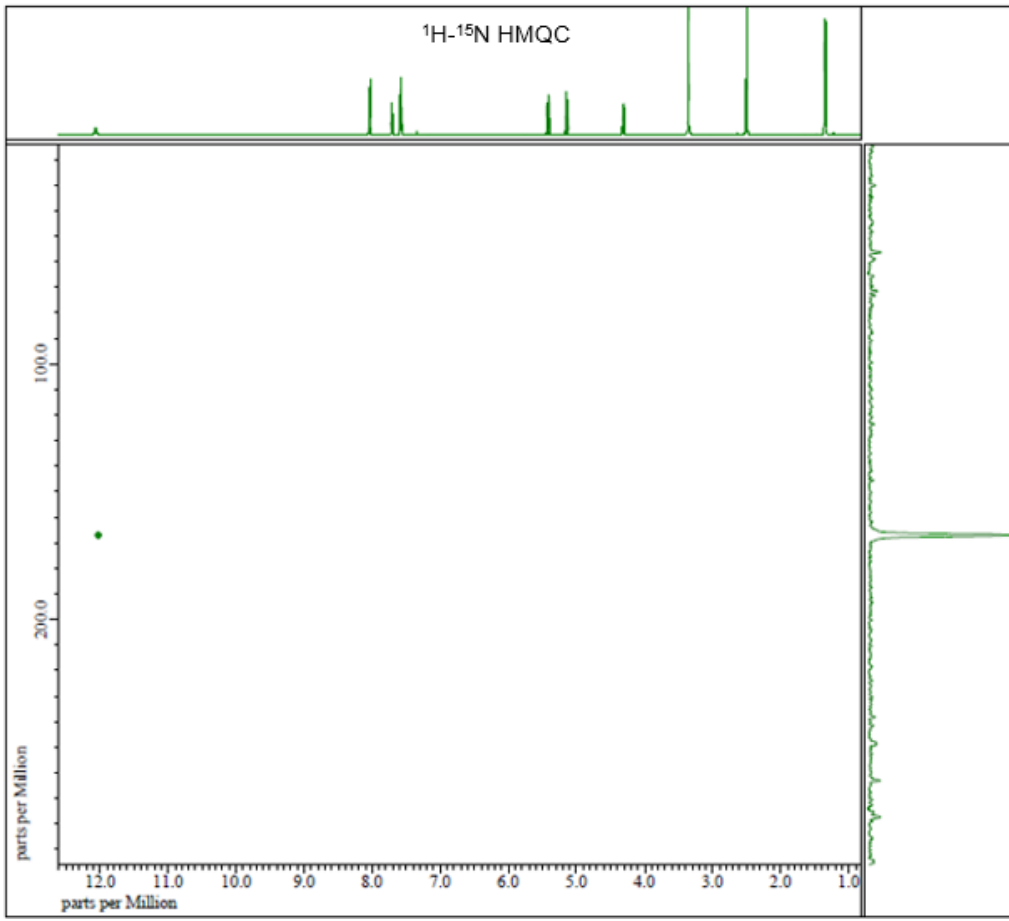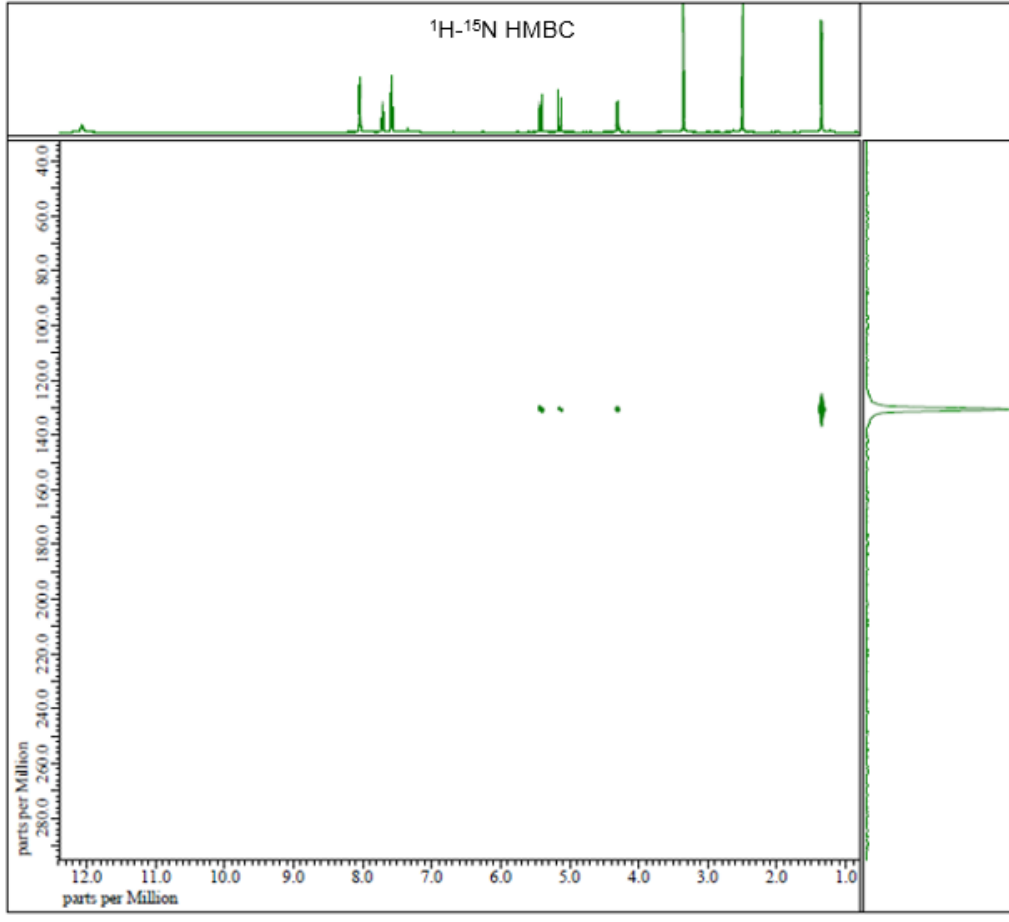



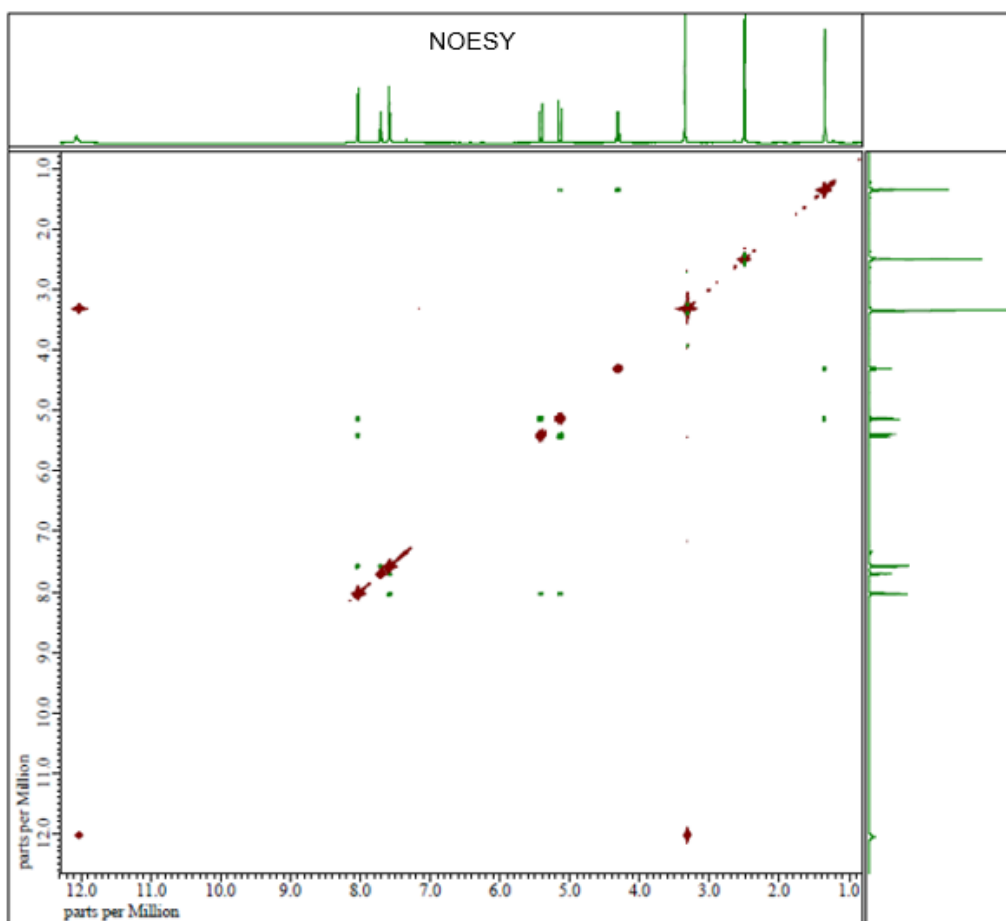

**(5S)-1-(2-(4-bromophenyl)-2-oxoethyl)-5-methyl-2-thioxoimidazolidin-4-one 7{5,1}**

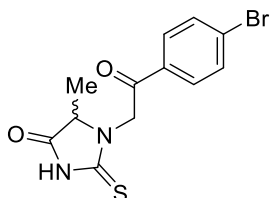

Brown amorphous solid, 12.2 mg (16%, 0.038 mmol). Cleaved from 517.5 mg of resin **2{5,1}** (0.460 mmol/g, 0.238 mmol of substrate). Final purity 98%.  $^1\text{H}$  NMR (500 MHz,  $\text{DMSO-}d_6$ ):  $\delta$  = 12.07 (br. s, 1H), 7.97 (br. d,  $J$  = 8.7 Hz, 2H), 7.80 (br. d,  $J$  = 8.7 Hz, 2H), 5.38 (d,  $J$  = 18.2 Hz, 1H), 5.13 (d,  $J$  = 18.2 Hz, 1H), 4.30 (q,  $J$  = 7.2 Hz, 1H), 1.34 (d,  $J$  = 7.2 Hz, 3H).  $^{13}\text{C}$  NMR (126 MHz,  $\text{DMSO-}d_6$ ):  $\delta$  = 192.26, 182.39, 175.52, 133.51, 131.95, 129.94, 128.03, 59.92, 50.28, 14.47. HRMS (ESI-TOF, pos.):  $m/z$  calcd for  $\text{C}_{12}\text{H}_{12}\text{BrN}_2\text{O}_2\text{S}$   $[\text{M}+\text{H}]^+$  326.9620, found 326.9628.

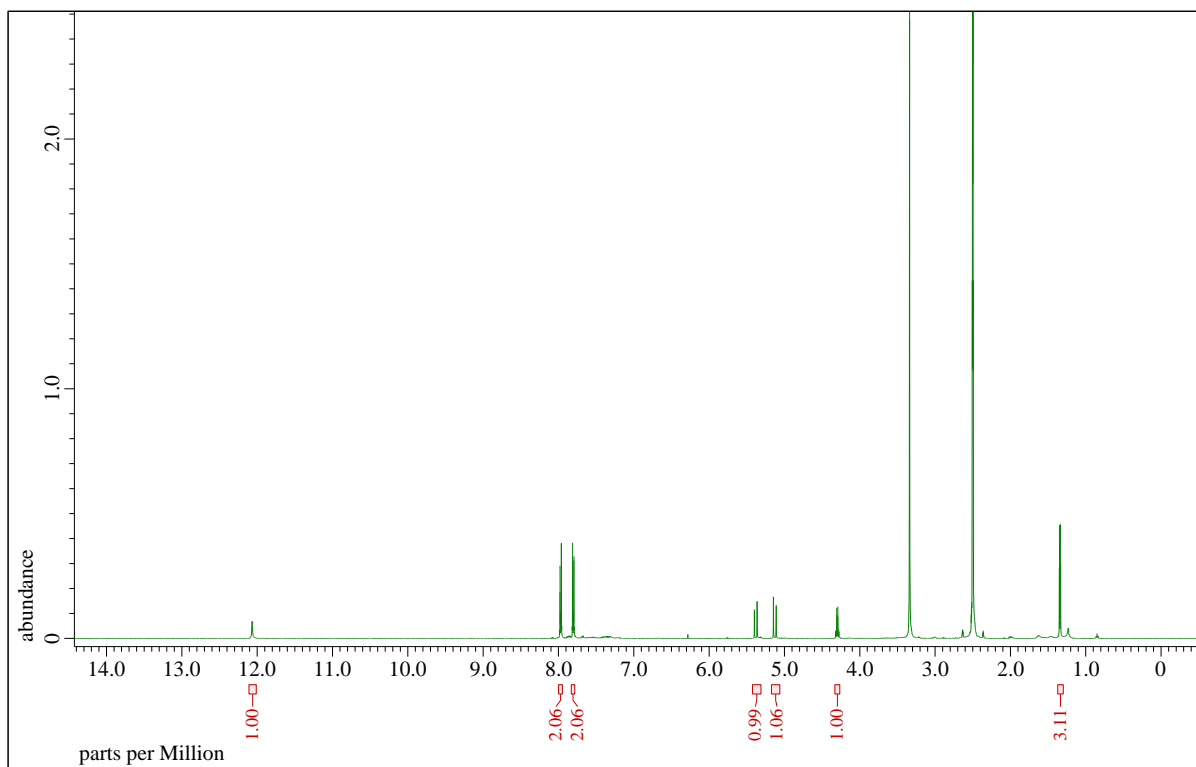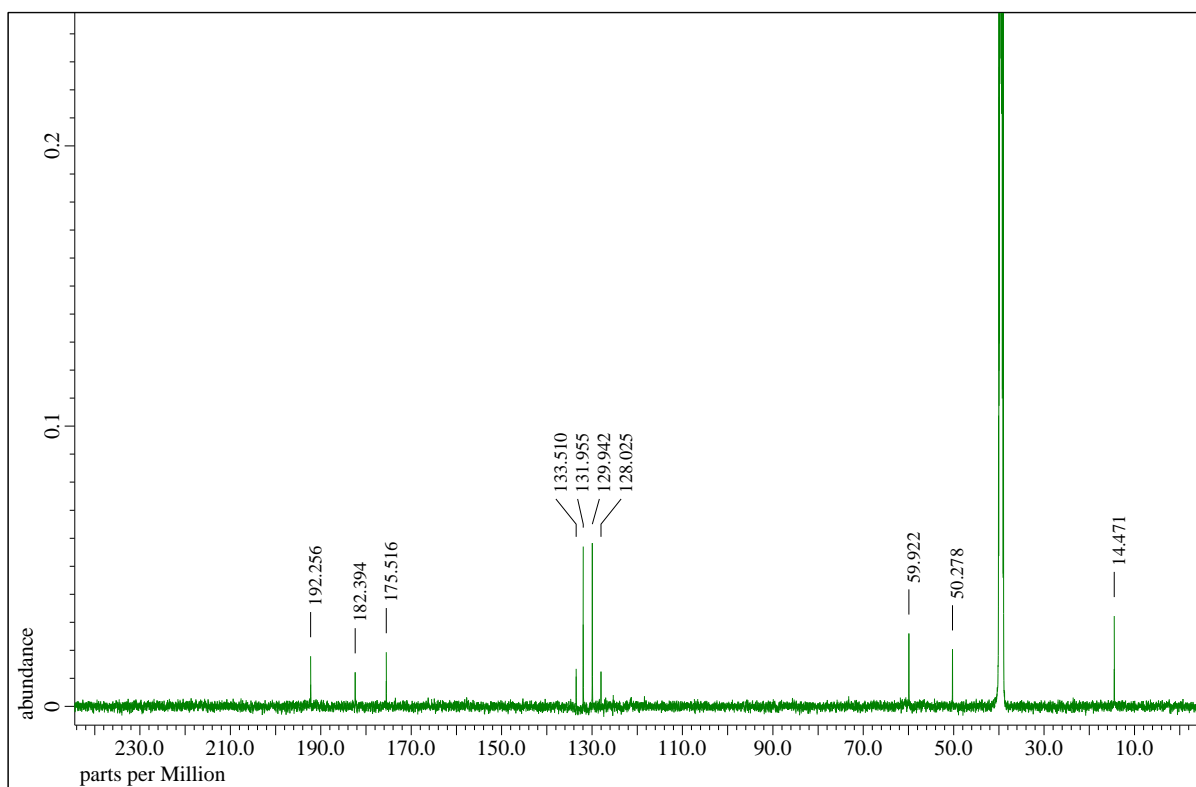

**(5S)-5-methyl-1-(2-oxo-2-(thiophen-3-yl)ethyl)-2-thioxoimidazolidin-4-one 7{7,1}**

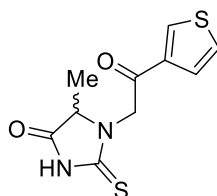

Creme amorphous solid, 14.6 mg (15%, 0.057 mmol). Cleaved from 637.0 mg of resin **2{7,1}** (0.460 mmol/g, 0.293 mmol of substrate). HPLC purity 99%.  $^1\text{H}$  NMR (500 MHz,  $\text{DMSO-}d_6$ ):  $\delta$  = 12.11 (br. s, 1H), 8.68 (dd,  $J$  = 2.8, 1.2 Hz, 1H), 7.70 (dd,  $J$  = 5.0, 2.8 Hz, 1H), 7.56 (dd,  $J$  = 5.0, 1.2 Hz, 1H), 5.30 (d,  $J$  = 18.2 Hz, 1H), 5.02 (d,  $J$  = 18.2 Hz, 1H), 4.30 (q,  $J$  = 7.1 Hz, 1H), 1.34 (d,  $J$  = 7.1 Hz, 3H).  $^{13}\text{C}$  NMR (126 MHz,  $\text{DMSO-}d_6$ ):  $\delta$  = 187.34, 182.35, 175.51, 139.06, 134.31, 127.78, 126.31, 59.94, 50.62, 14.47. HRMS (ESI-TOF, neg.):  $m/z$  calcd for  $\text{C}_{10}\text{H}_9\text{N}_2\text{O}_2\text{S}_2$   $[\text{M-H}]^-$  253.0100, found 253.0107.

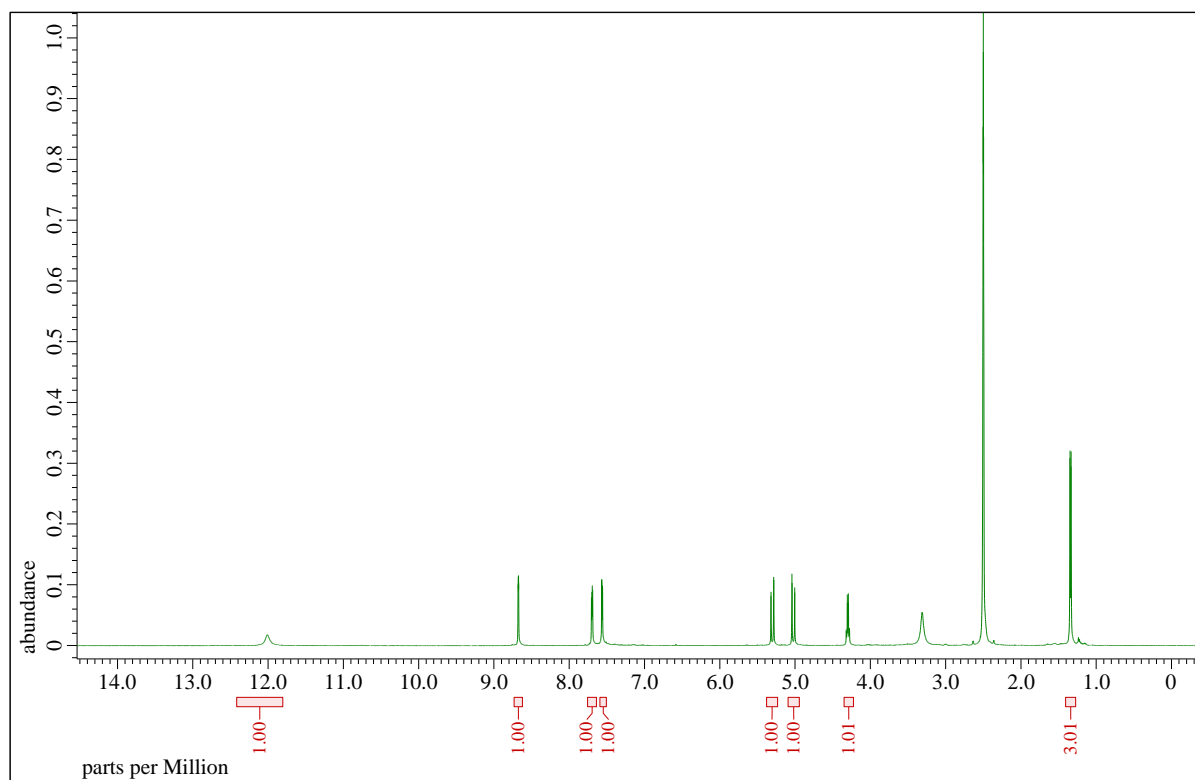

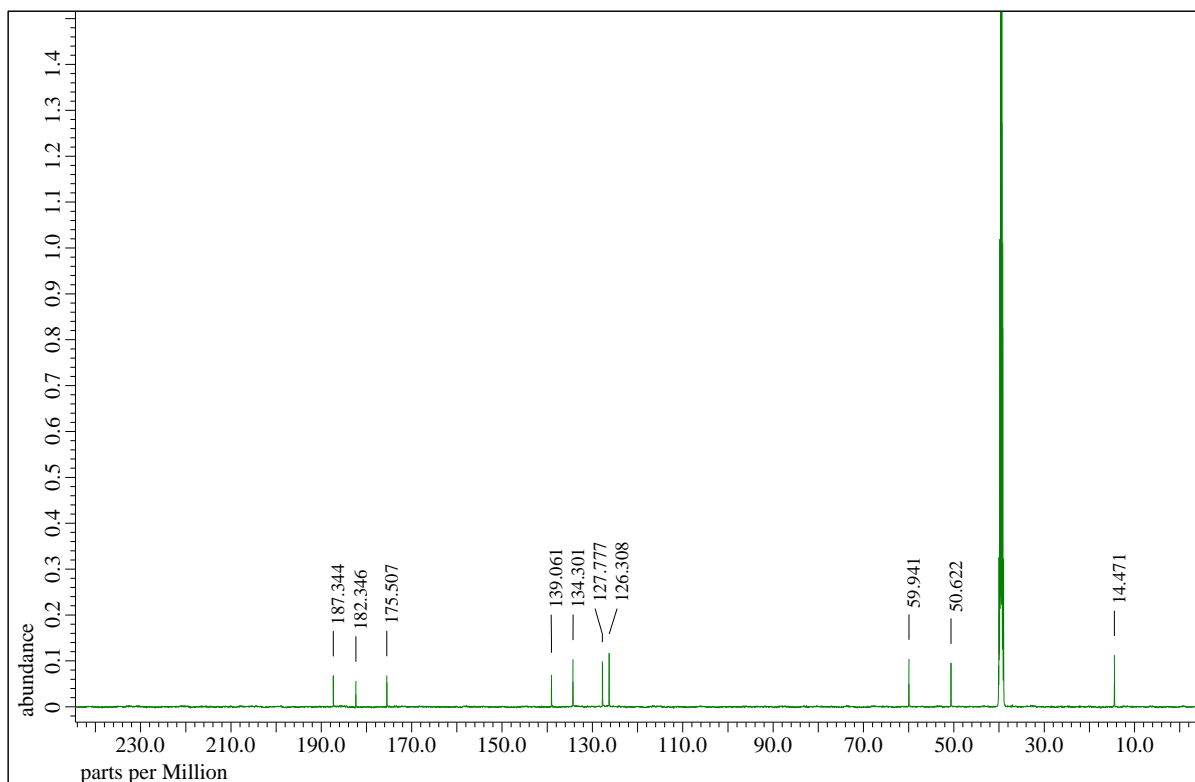

**(3R)-7-benzyl-6-phenyl-2,3-dihydroimidazo[2,1-*b*]thiazol-7-ium-3-carboxylate 8{1,2}**

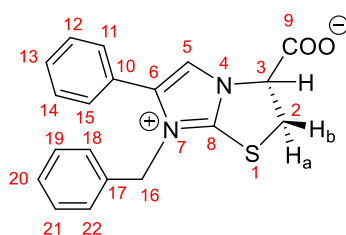

NMR: Mixture with 7% of **9{1,2}**. Creme amorphous solid, 19.0 mg (53%, 0.057 mmol). Cleaved from 212.8 mg of resin **2{1,2}** (0.503 mmol/g, 0.107 mmol of substrate). HPLC purity 98%.  $^1\text{H}$  NMR (500 MHz,  $\text{DMSO-}d_6$ ):  $\delta$  = 7.93 (s, 1H, HC<sup>5</sup>), 7.47-7.52 (m, 5H, HC<sup>11-15</sup>), 7.34-7.40 (m, 3H, HC<sup>19-21</sup>), 7.00-7.12 (m, 2H, HC<sup>18,22</sup>), 5.28 (s, 2H, HC<sup>16</sup>), 4.96 (dd,  $J$  = 8.6, 6.2 Hz, 1H, HC<sup>3</sup>), 4.29 (dd,  $J$  = 11.1, 8.6 Hz, 1H, H<sub>b</sub>C<sup>2</sup>), 4.23 (dd,  $J$  = 11.1, 6.2 Hz, 1H, H<sub>a</sub>C<sup>2</sup>).  $^{13}\text{C}$  NMR (126 MHz,  $\text{DMSO-}d_6$ ):  $\delta$  = 165.49 (C9), 150.04 (C8), 136.50 (C6), 133.19 (C17), 129.86 (C13), 129.11 (C12,14), 129.09 (C11,15), 128.86 (C19,21), 128.59 (C20), 127.67 (C18,22), 126.20 (C10), 119.30 (C5), 63.99 (C3), 50.13 (C16), 41.59 (C2).  $^{15}\text{N}$  NMR (51 MHz,  $\text{DMSO-}d_6$ ):  $\delta$  = 189.1 (N4); 162.6 (N7). HRMS (ESI-TOF, neg.):  $m/z$  calcd for  $\text{C}_{19}\text{H}_{15}\text{N}_2\text{O}_2\text{S}$  [M-H]<sup>-</sup> 335.0849, found 335.0846.

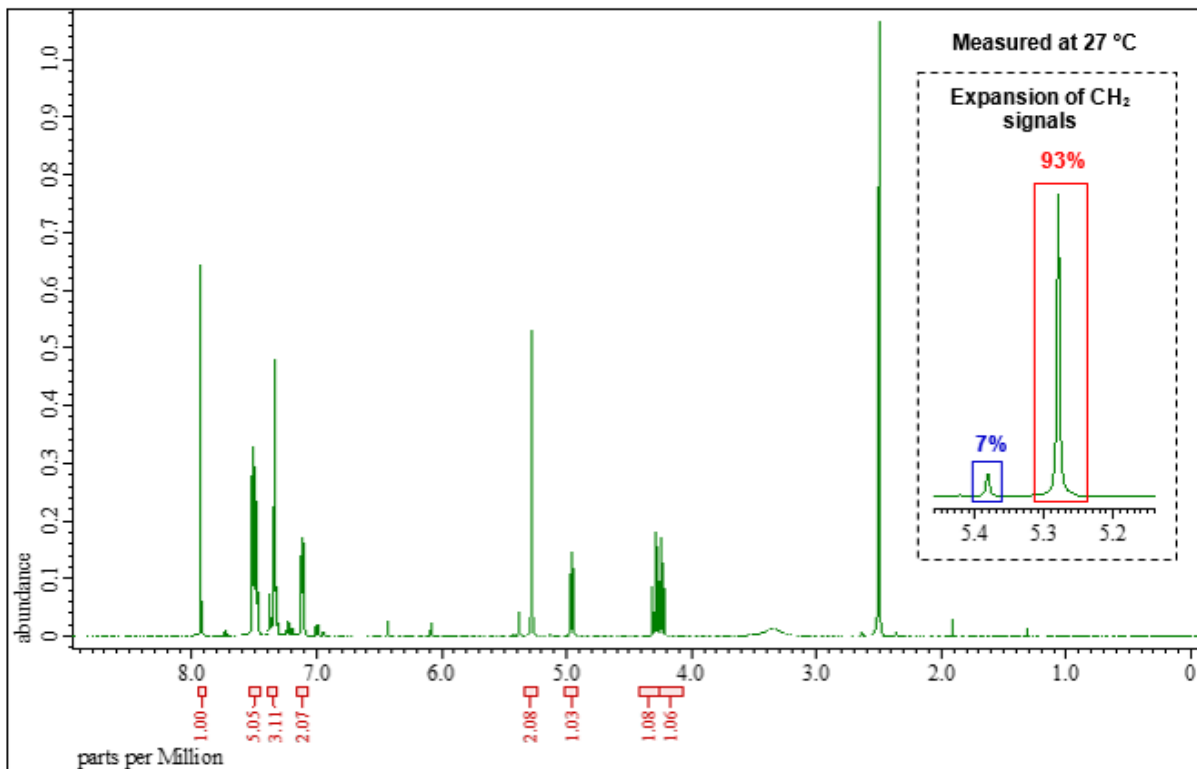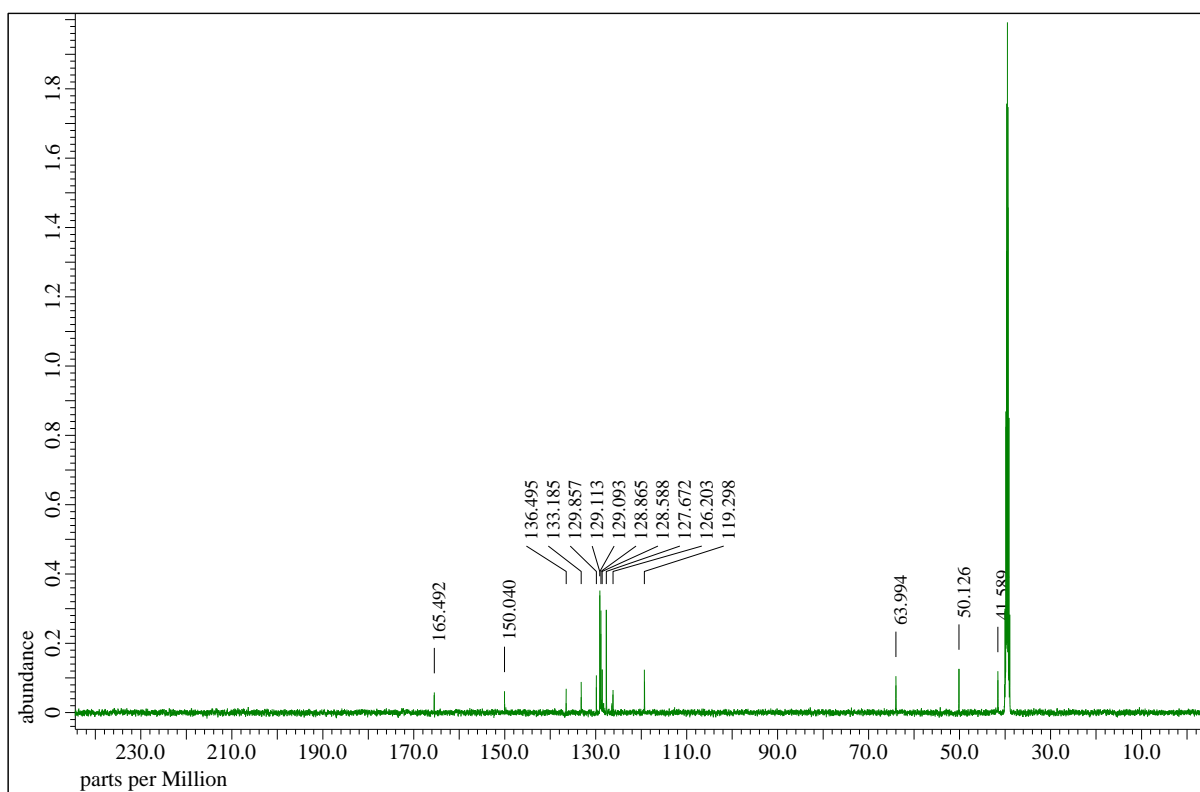

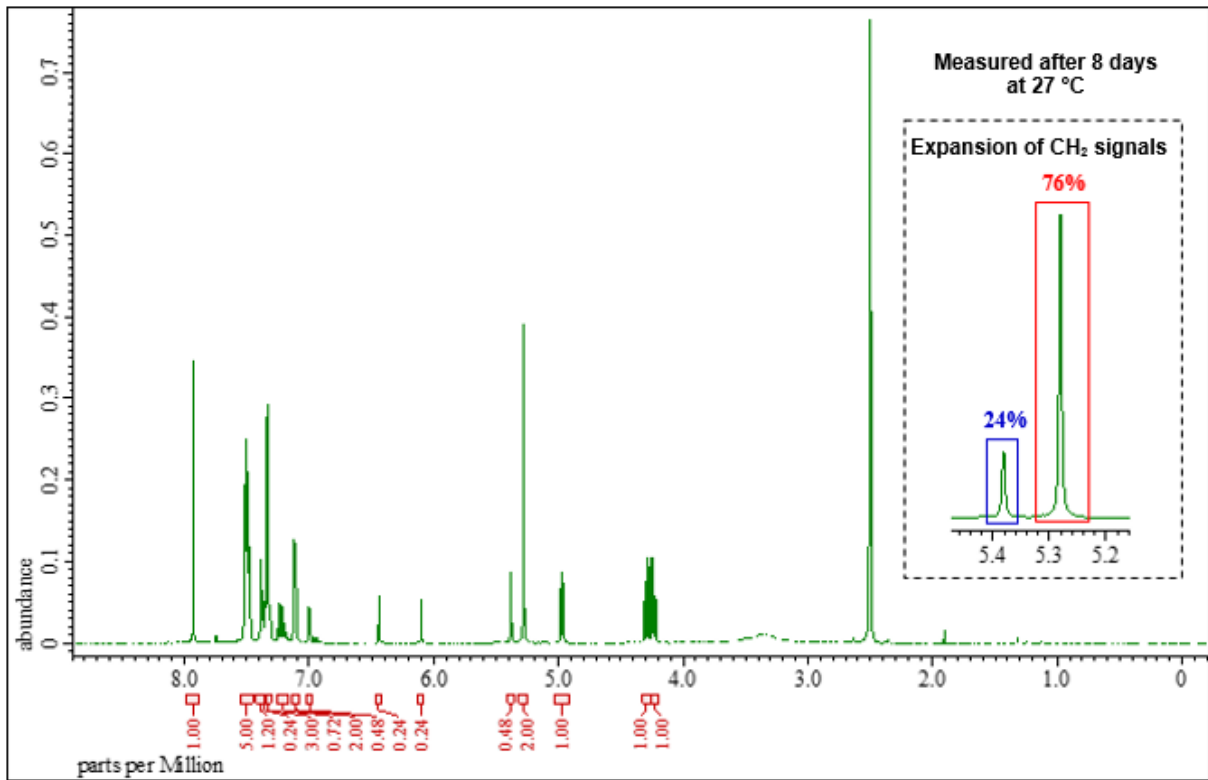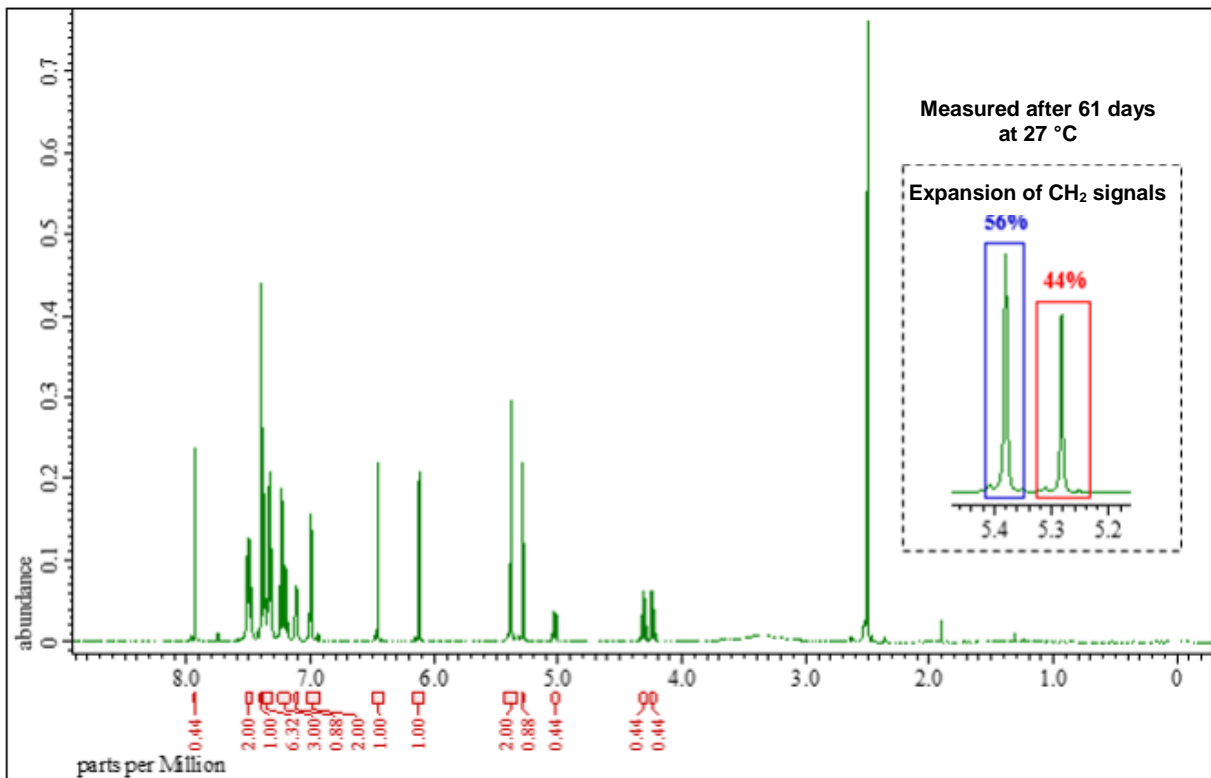

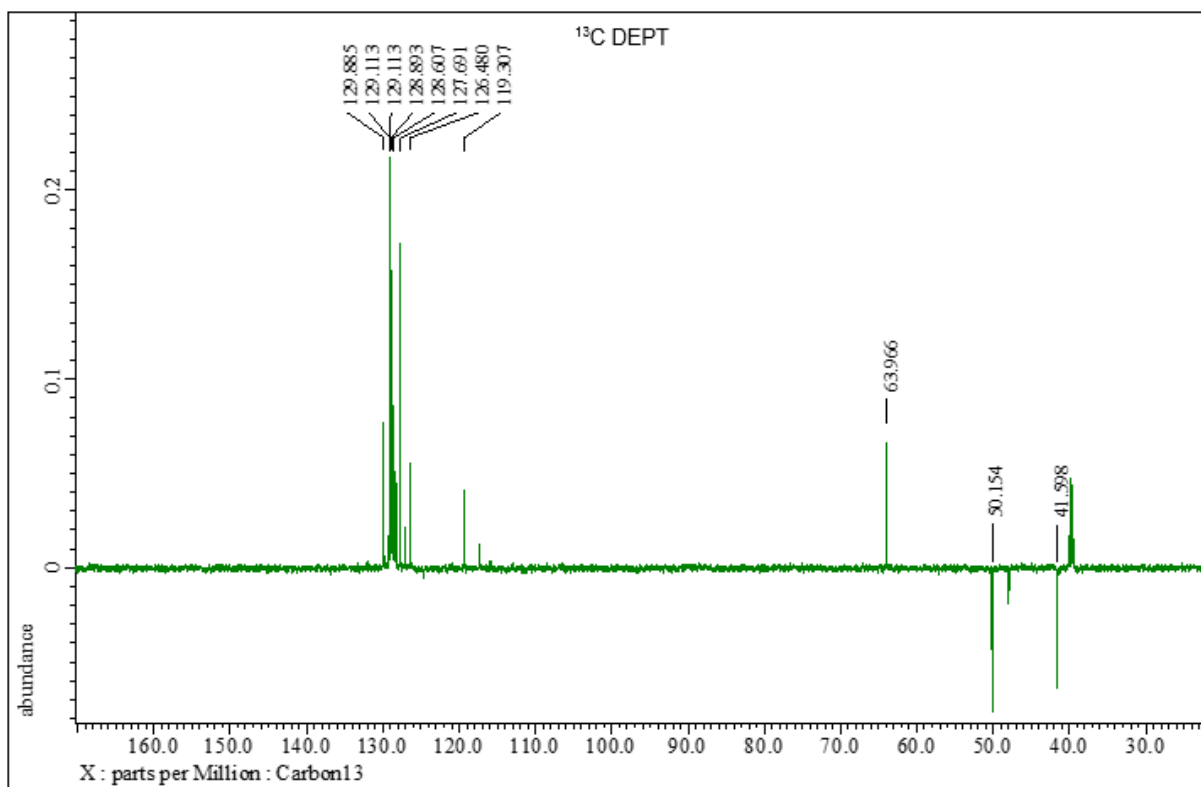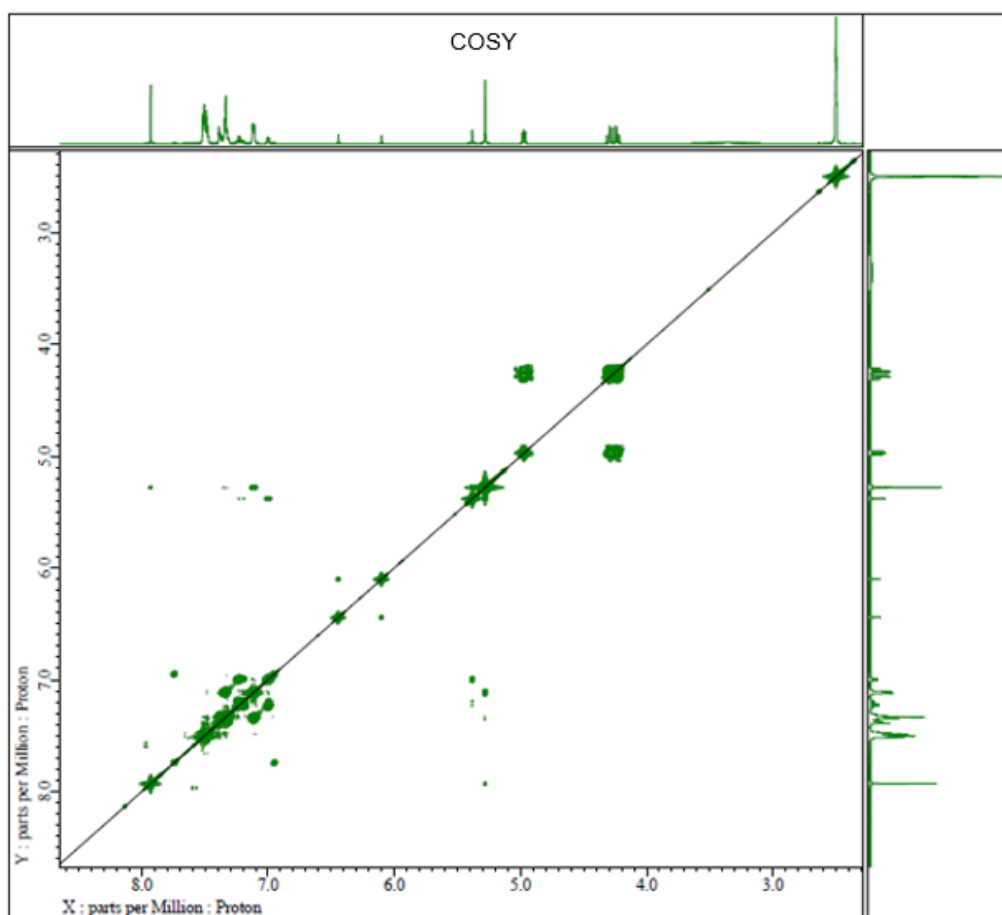

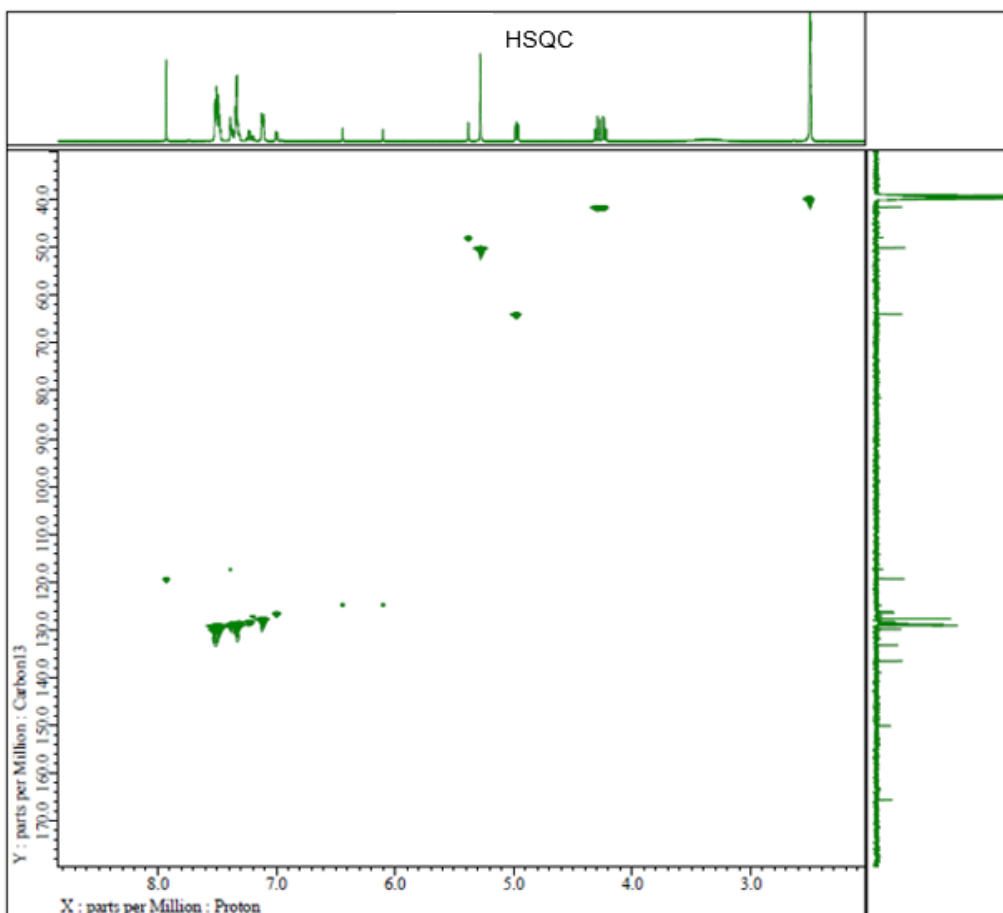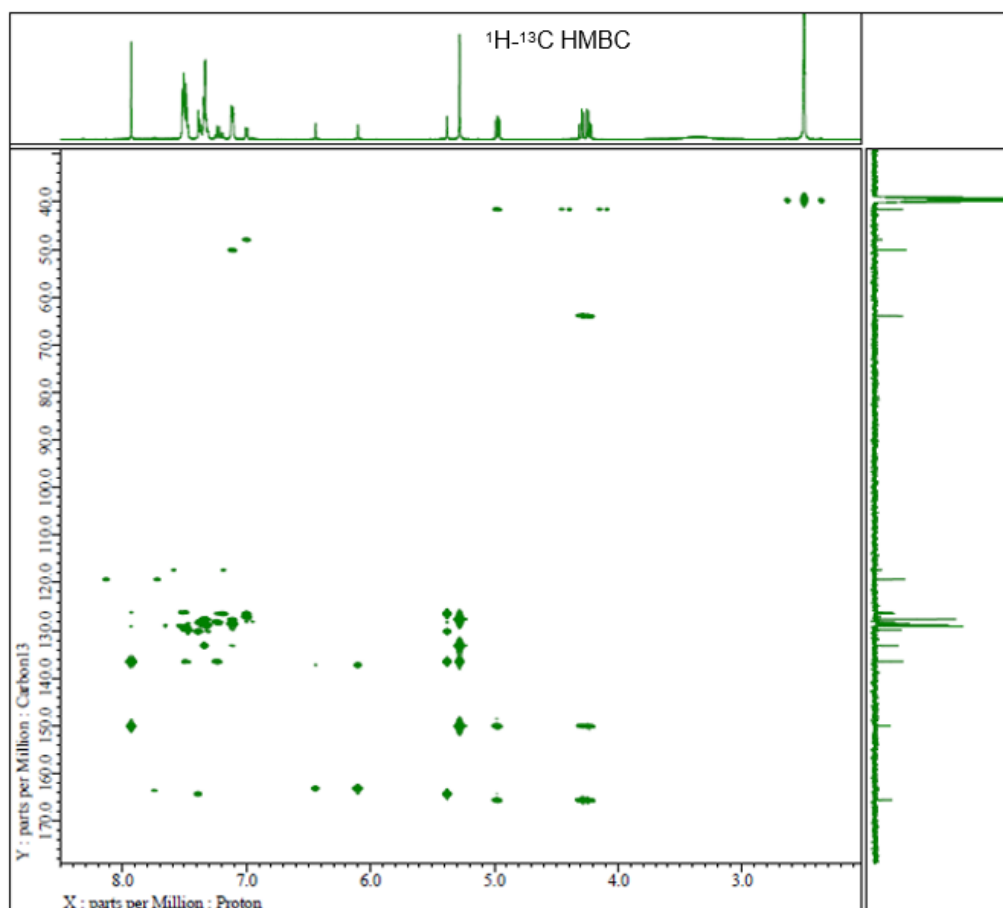



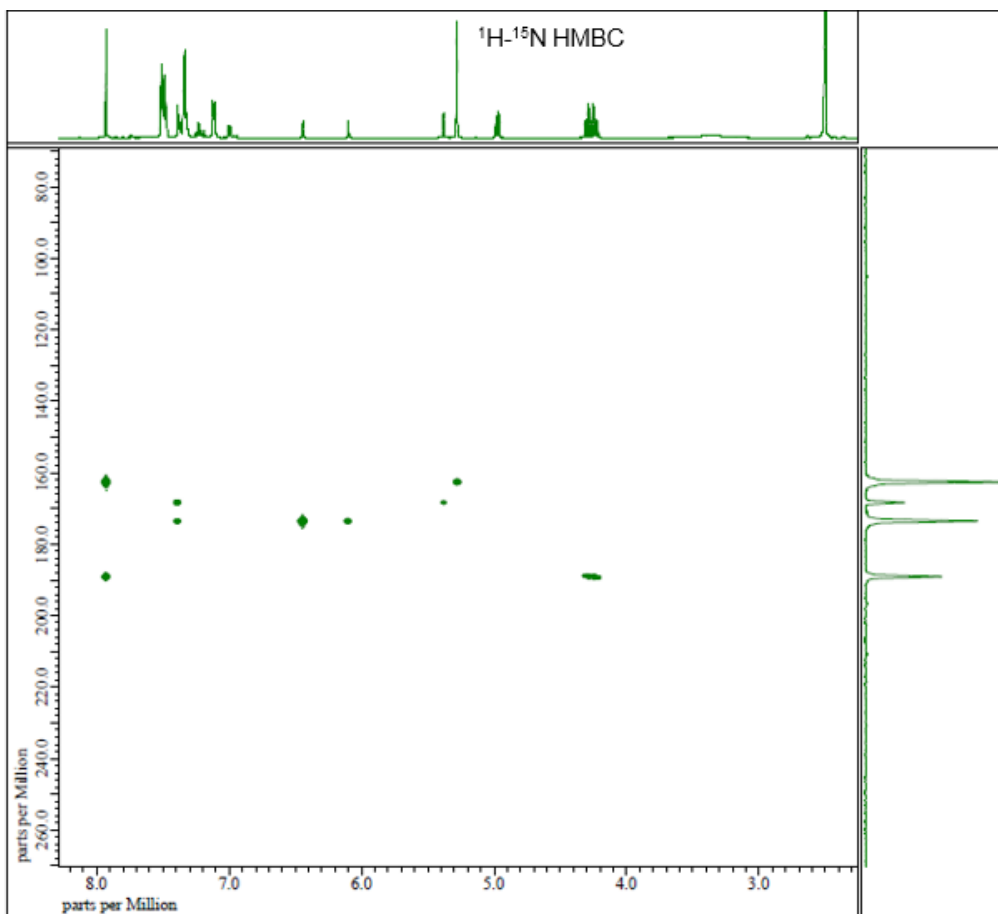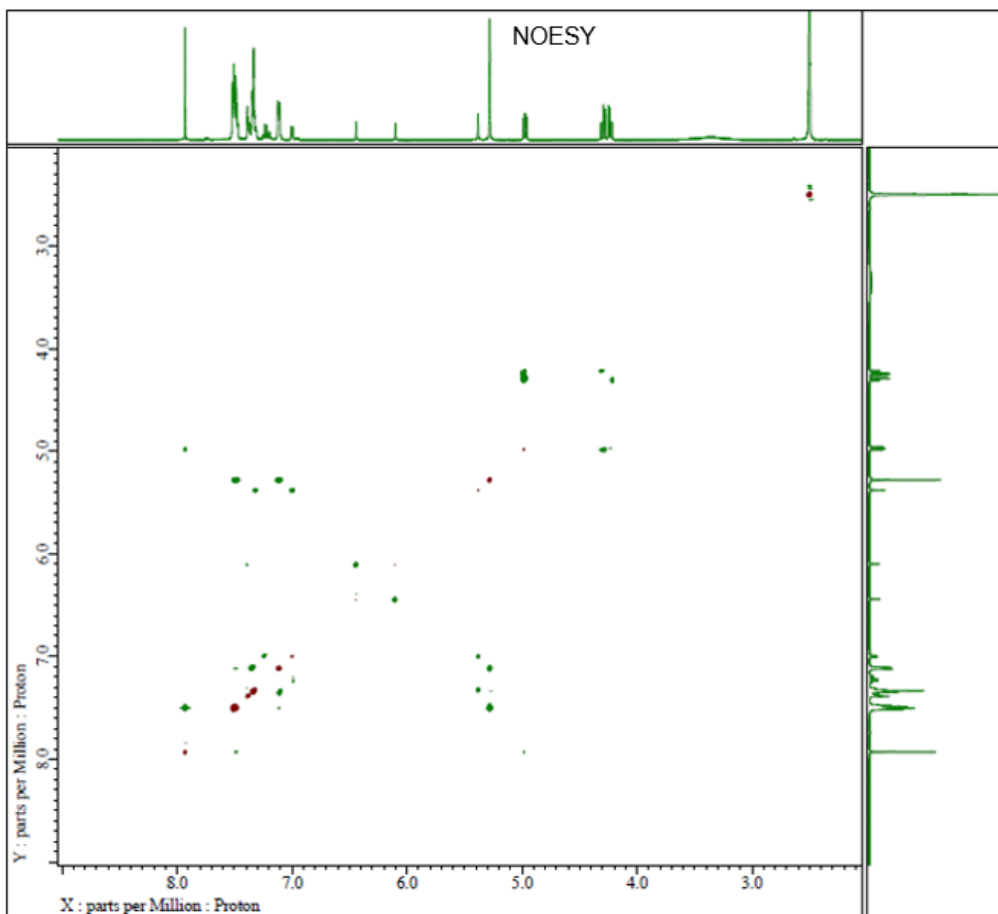

## 2-(3-benzyl-4-phenyl-2-thioxo-2,3-dihydro-1H-imidazol-1-yl)acrylic acid **9**{1,2}

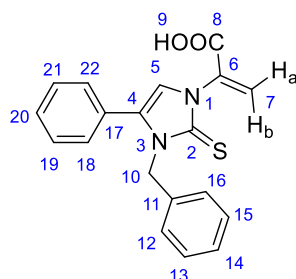

NMR purity 99%, yield quantitative (calculated from **8**{1,2}).  $^1\text{H}$  NMR (500 MHz,  $\text{DMSO-}d_6$ ):  $\delta$  = 13.28 (br. s, 1H,  $\text{HO}^9$ ), 7.41 (s, 1H,  $\text{HC}^5$ ), 7.37-7.39 (m, 3H,  $\text{HC}^{19-21}$ ), 7.31-7.33 (m, 2H,  $\text{HC}^{18,22}$ ), 7.18-7.25 (m, 3H,  $\text{HC}^{13-15}$ ), 6.98-7.01 (m, 2H,  $\text{HC}^{12,16}$ ), 6.47 (d,  $J$  = 0.7 Hz, 1H,  $\text{H}_a\text{C}^7$ ), 6.14 (d,  $J$  = 0.7 Hz, 1H,  $\text{H}_b\text{C}^7$ ), 5.38 (s, 2H,  $\text{HC}^{10}$ ).  $^{13}\text{C}$  NMR (126 MHz,  $\text{DMSO-}d_6$ ):  $\delta$  = 164.39 (C2), 163.08 (C8), 136.65 (C6), 136.48 (C11), 130.37 (C4), 128.88 (C20), 128.72 (C19,21), 128.45 (C18,22), 128.30 (C13,15), 127.92 (C17), 127.12 (C14), 126.47 (C12,16), 125.28 (C7), 117.20 (C5), 47.95 (C10).  $^{15}\text{N}$  NMR (51 MHz,  $\text{DMSO-}d_6$ ):  $\delta$  = 173.5 (N1); 168.3 (N3). The 2D assignments are made from the previous sample **8**{1,2} presented as the mixture with 24% of **9**{1,2}. HRMS (ESI-TOF, neg.):  $m/z$  calcd for  $\text{C}_{19}\text{H}_{15}\text{N}_2\text{O}_2\text{S}$  [ $\text{M-H}$ ] 335.0849, found 335.0846.

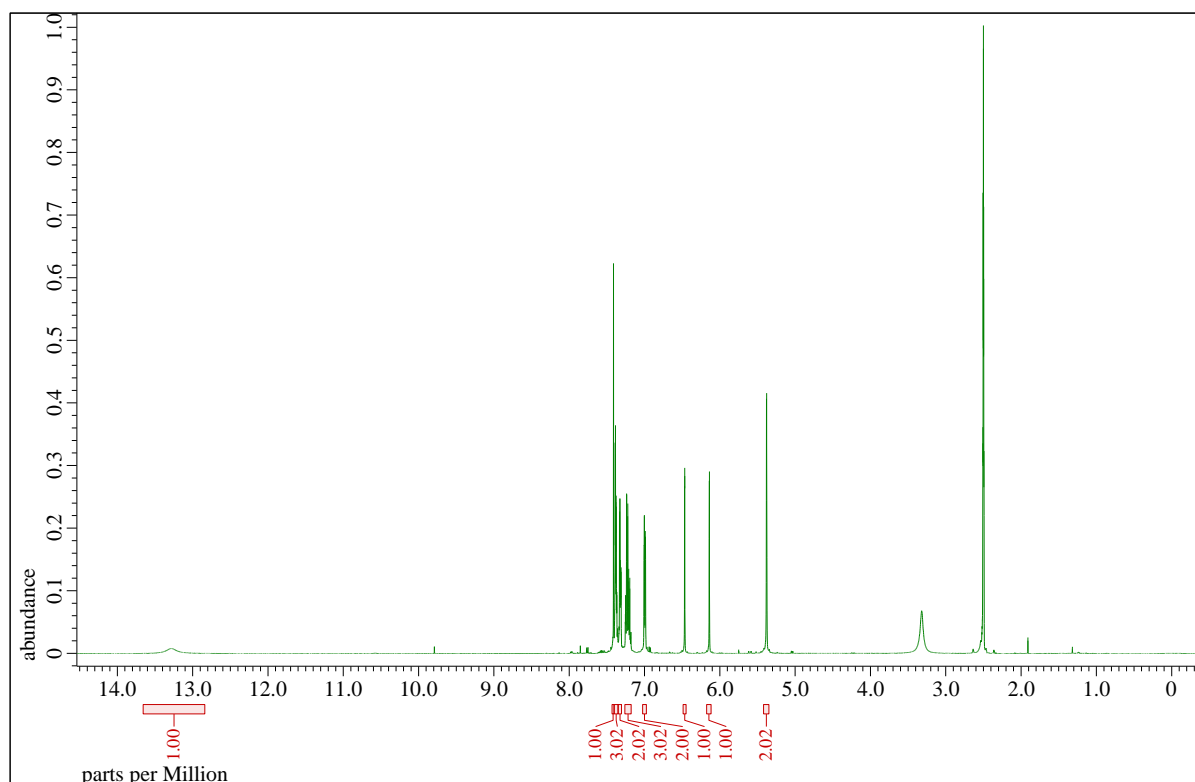

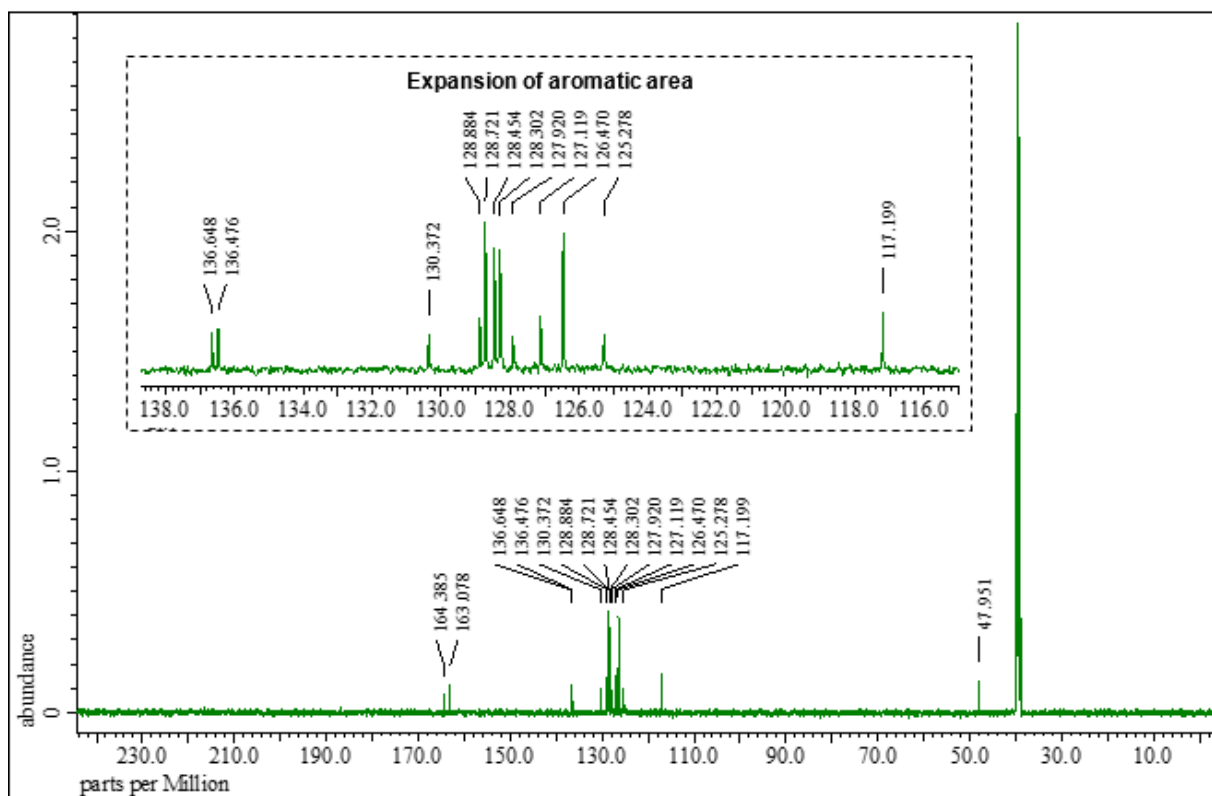

**(3R)-7-allyl-6-phenyl-2,3-dihydroimidazo[2,1-*b*]thiazol-7-ium-3-carboxylate 8{1,3}**

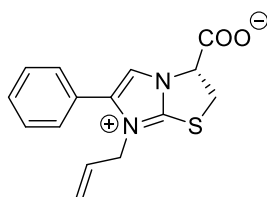

Crème amorphous solid, 17.7 mg (34%, 0.062 mmol). Cleaved from 316.9 mg of resin **2{1,3}** (0.575 mmol/g, 0.182 mmol of substrate). HPLC purity 98%.  $^1\text{H}$  NMR (500 MHz,  $\text{DMSO-}d_6$ ):  $\delta$  = 7.91 (s, 1H), 7.50-7.55 (m, 5H), 5.88-5.94 (m, 1H), 5.33 (br. d,  $J$  = 10.4 Hz, 1H), 5.14 (br. d,  $J$  = 17.1 Hz, 1H), 4.96 (dd,  $J$  = 8.4, 6.0 Hz, 1H), 4.64 (ddd,  $J$  = 4.7, 1.4, 1.4 Hz, 2H), 4.34 (dd,  $J$  = 11.0, 8.4 Hz, 1H), 4.28 (dd,  $J$  = 11.0, 6.0 Hz, 1H).  $^{13}\text{C}$  NMR (126 MHz,  $\text{DMSO-}d_6$ ):  $\delta$  = 165.55, 149.92, 136.48, 130.23, 129.84, 129.16, 128.86, 126.17, 119.56, 118.98, 64.07, 49.00, 41.68. HRMS (ESI-TOF, pos.):  $m/z$  calcd for  $\text{C}_{15}\text{H}_{15}\text{N}_2\text{O}_2\text{S}$   $[\text{M}+\text{H}]^+$  287.0849, found 287.0847.

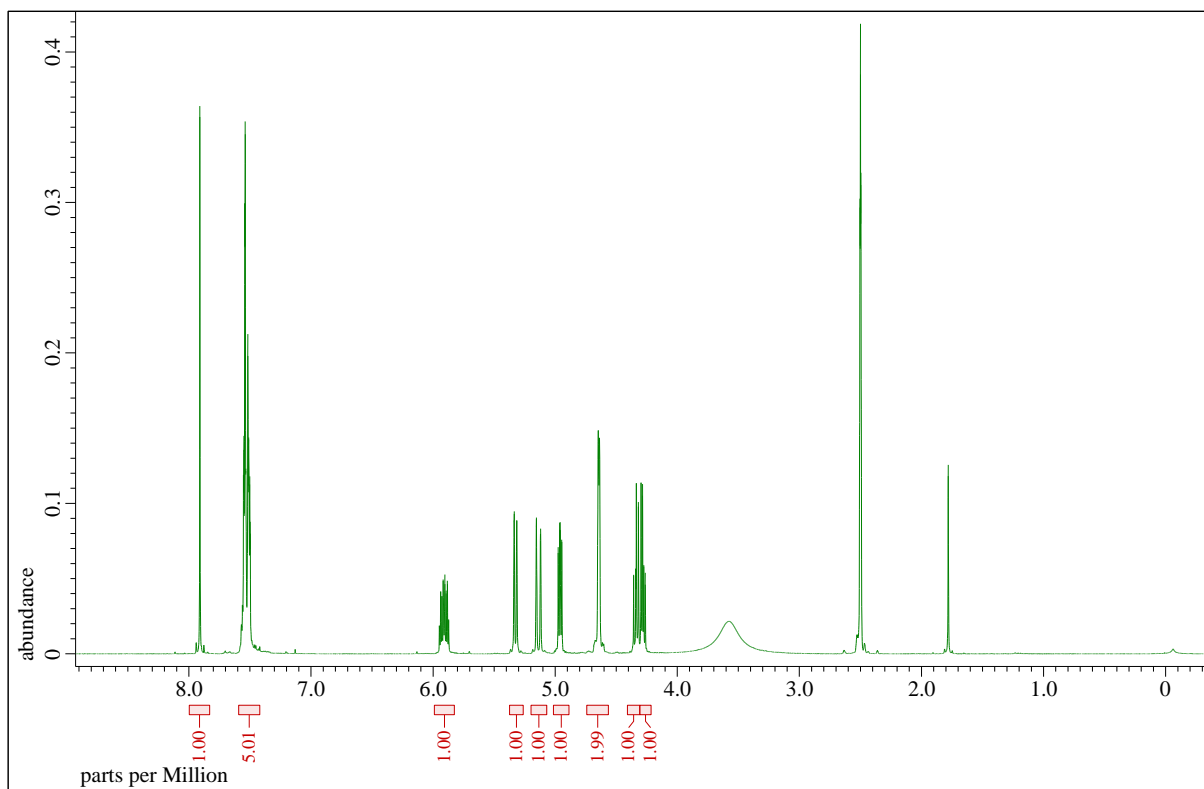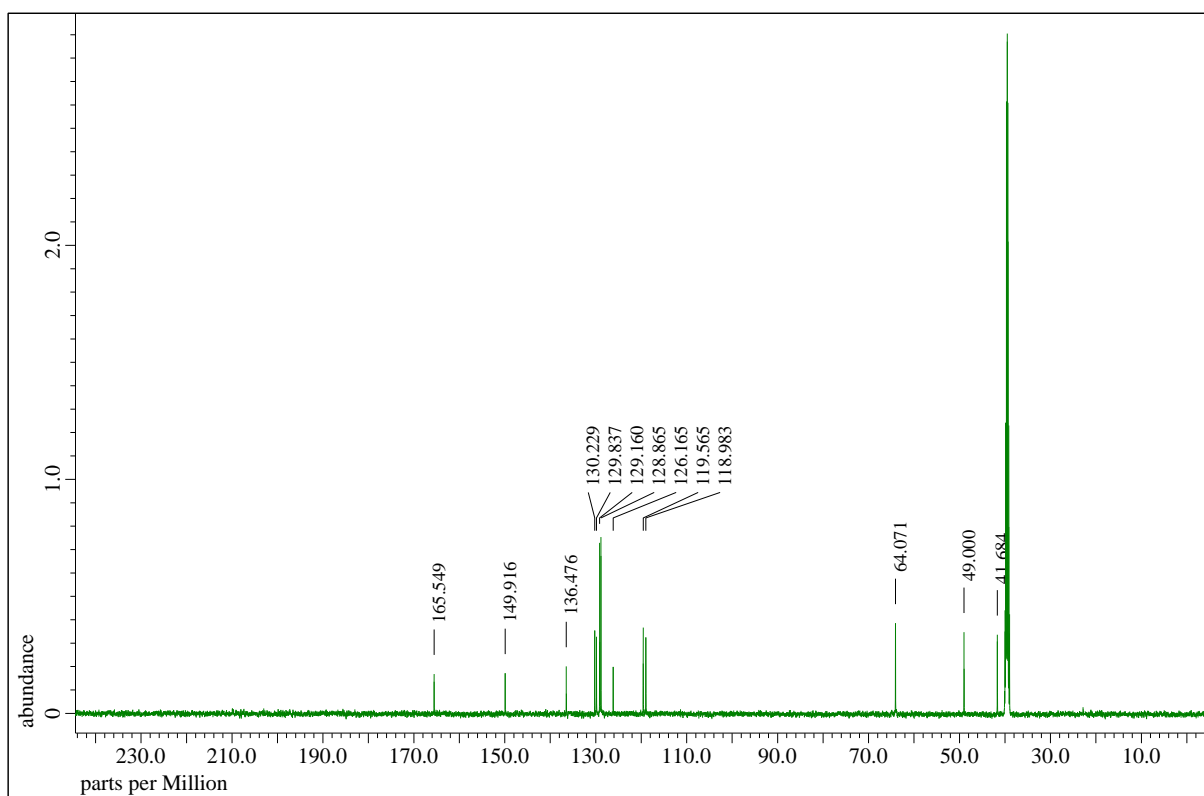

## 2-(3-allyl-4-phenyl-2-thioxo-2,3-dihydro-1H-imidazol-1-yl)acrylic acid 9{1,3}

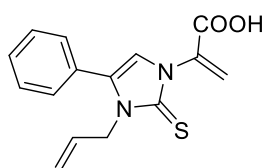

NMR: Mixture with 8% of **8**{1,3}.  $^1\text{H}$  NMR (500 MHz,  $\text{DMSO-}d_6$ ):  $\delta$  = 7.44-7.50 (m, 5H), 7.35 (s, 1H), 6.42 (d,  $J$  = 0.7 Hz, 1H), 6.05 (d,  $J$  = 0.7 Hz, 1H), 5.78-5.84 (m, 1H), 5.10 (br. d,  $J$  = 10.4 Hz, 1H), 4.84 (br. d,  $J$  = 17.2 Hz, 1H), 4.71 (ddd,  $J$  = 4.8, 1.8, 1.8 Hz, 2H).  $^{13}\text{C}$  NMR (126 MHz,  $\text{DMSO-}d_6$ ):  $\delta$  = 163.68, 163.20, 137.13, 132.34, 130.18, 128.86, 128.82, 128.44, 128.05, 124.60, 116.98, 116.89, 47.10. HRMS (ESI-TOF, pos.):  $m/z$  calcd for  $\text{C}_{15}\text{H}_{15}\text{N}_2\text{O}_2\text{S}$   $[\text{M}+\text{H}]^+$  287.0849, found 287.0847.

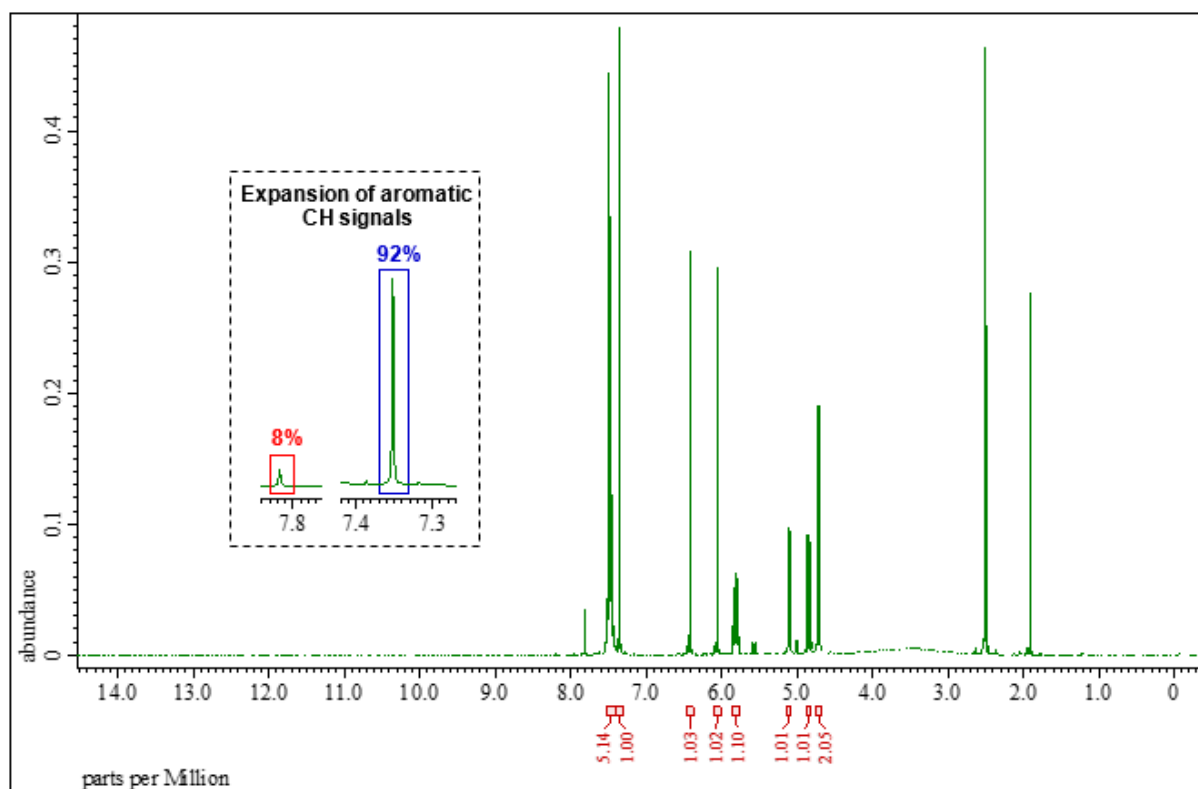

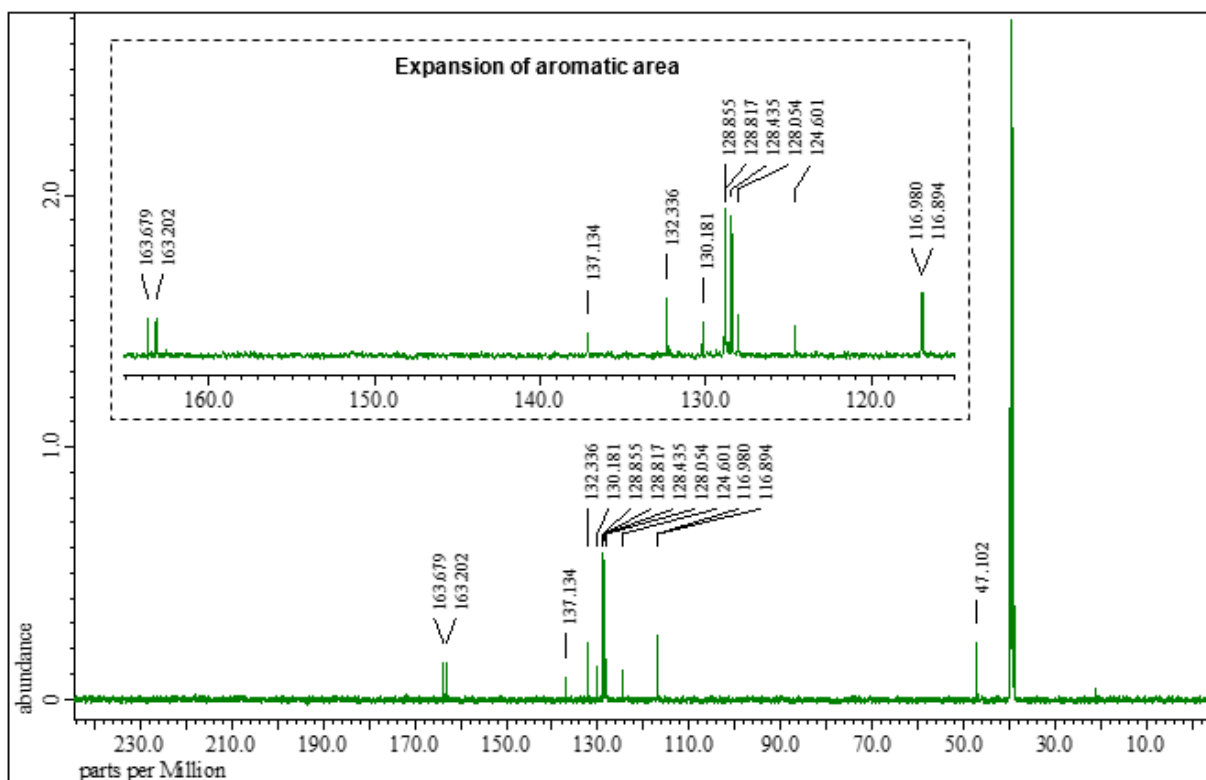

**(3R)-7-ethyl-6-phenyl-2,3-dihydroimidazo[2,1-b]thiazol-7-ium-3-carboxylate 8{1,4}**

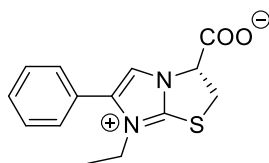

NMR: Mixture with 55% of **9{1,4}**. Creme amorphous solid, 11.4 mg (23%, 0.042 mmol) of which **8{1,4}** 4.3 mg (9%, 0.016 mmol) and **9{1,4}** 7.1 mg (14%, 0.026 mmol). Cleaved from 312.8 mg of resin **2{1,4}** (0.575 mmol/g, 0.180 mmol of substrate). HPLC purity 99%. <sup>1</sup>H NMR (500 MHz, DMSO-*d*<sub>6</sub>):  $\delta$  = 7.88 (s, 1H), 7.47-7.51 (m, 5H), 5.09 (m, 1H), 4.40 (dd, *J* = 11.1, 8.4 Hz, 1H), 4.32 (dd, *J* = 11.1, 6.0 Hz, 1H), 4.05 (q, *J* = 7.3 Hz, 2H), 1.22 (t, *J* = 7.3 Hz, 3H). HRMS (ESI-TOF, pos.): *m/z* calcd for C<sub>14</sub>H<sub>15</sub>N<sub>2</sub>O<sub>2</sub>S [M+H]<sup>+</sup> 275.0849, found 275.0848.

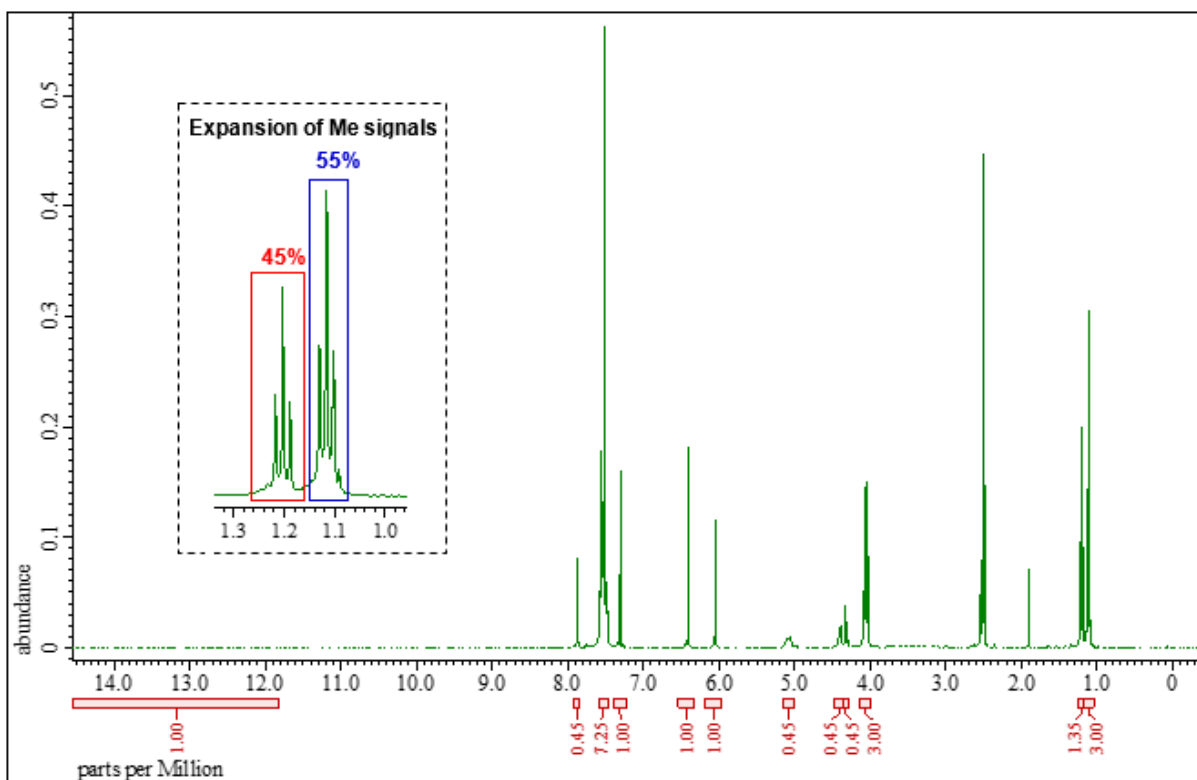

**2-(3-ethyl-4-phenyl-2-thioxo-2,3-dihydro-1H-imidazol-1-yl)acrylic acid 9{1,4}**

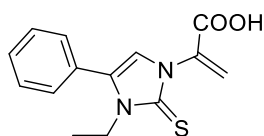

NMR: Mixture with 11% of **8**{1,4}.  $^1\text{H}$  NMR (500 MHz,  $\text{DMSO-}d_6$ ):  $\delta$  = 13.24 (br. s, 1H), 7.48-7.53 (m, 5H), 7.32 (s, 1H), 6.41 (d,  $J$  = 0.7 Hz, 1H), 6.06 (d,  $J$  = 0.7 Hz, 1H), 4.06 (q,  $J$  = 7.1 Hz, 2H), 1.12 (t,  $J$  = 7.1 Hz, 3H).  $^{13}\text{C}$  NMR (126 MHz,  $\text{DMSO-}d_6$ ):  $\delta$  = 163.13, 162.78, 136.51, 129.97, 128.97, 128.92, 128.68, 128.08, 125.00, 116.85, 40.03, 13.39. HRMS (ESI-TOF, pos.):  $m/z$  calcd for  $\text{C}_{14}\text{H}_{15}\text{N}_2\text{O}_2\text{S}$   $[\text{M}+\text{H}]^+$  275.0849, found 275.0848.

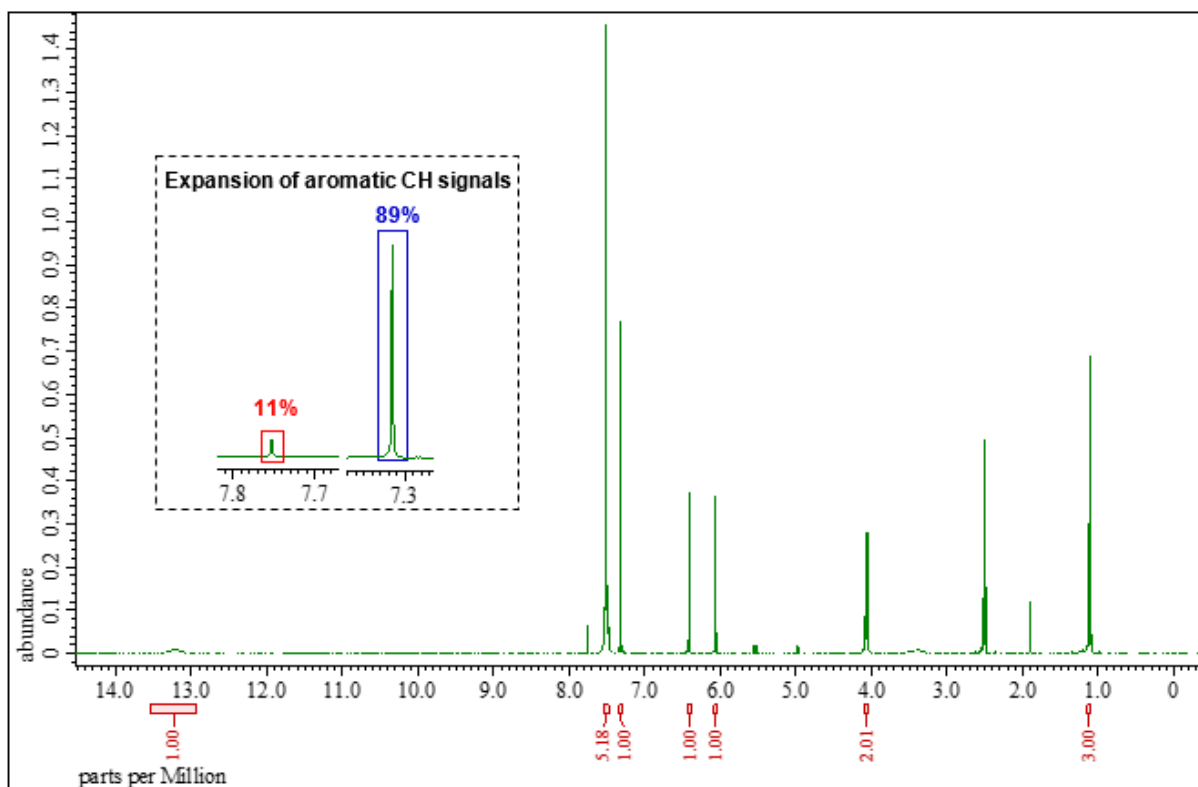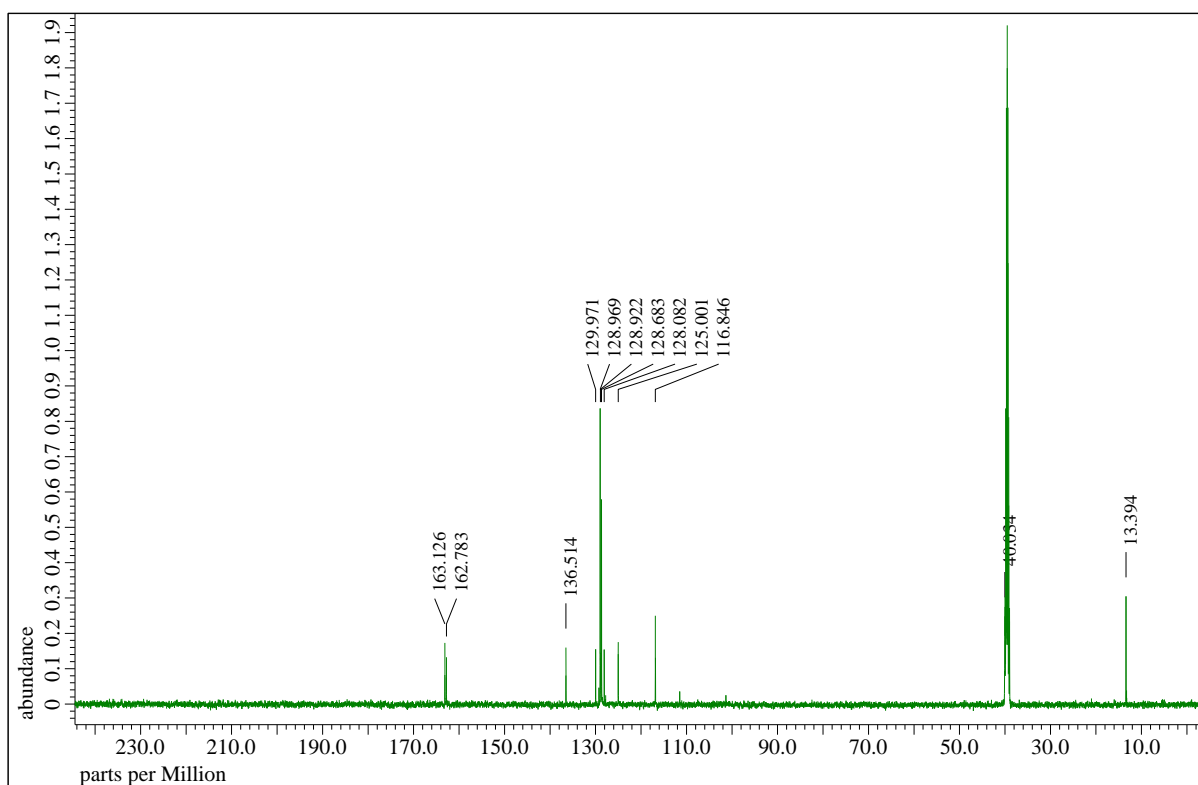



**(3R)-7-benzyl-6-(*p*-tolyl)-2,3-dihydroimidazo[2,1-*b*]thiazol-7-ium-3-carboxylate 8{2,2}**

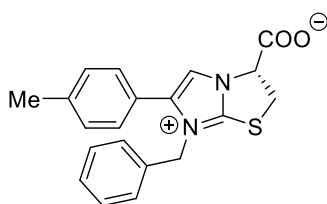

NMR: Mixture with 3% of **9**{2,2}. Creme amorphous solid, 23.3 mg (38%, 0.067 mmol). Cleaved from 308.4 mg of resin **2**{2,2} (0.565 mmol/g, 0.174 mmol of substrate). HPLC purity 99%. <sup>1</sup>H NMR (500 MHz, DMSO-*d*<sub>6</sub>):  $\delta$  = 7.91 (s, 1H), 7.31-7.38 (m, 7H), 7.12-7.14 (m, 2H), 5.28 (s, 2H), 5.18 (dd, *J* = 8.7, 5.5 Hz, 1H), 4.36 (dd, *J* = 11.3, 8.7 Hz, 1H), 4.22 (dd, *J* = 11.3, 5.5 Hz, 1H), 2.35 (s, 3H). <sup>13</sup>C NMR (126 MHz, DMSO-*d*<sub>6</sub>):  $\delta$  = 166.70, 150.33, 139.80, 136.97, 133.11, 129.69, 129.10, 128.93, 128.66, 127.71, 123.16, 118.90, 63.30, 50.15, 41.35, 20.84. HRMS (ESI-TOF, pos.): *m/z* calcd for C<sub>20</sub>H<sub>19</sub>N<sub>2</sub>O<sub>2</sub>S [M+H]<sup>+</sup> 351.1162, found 351.1165.

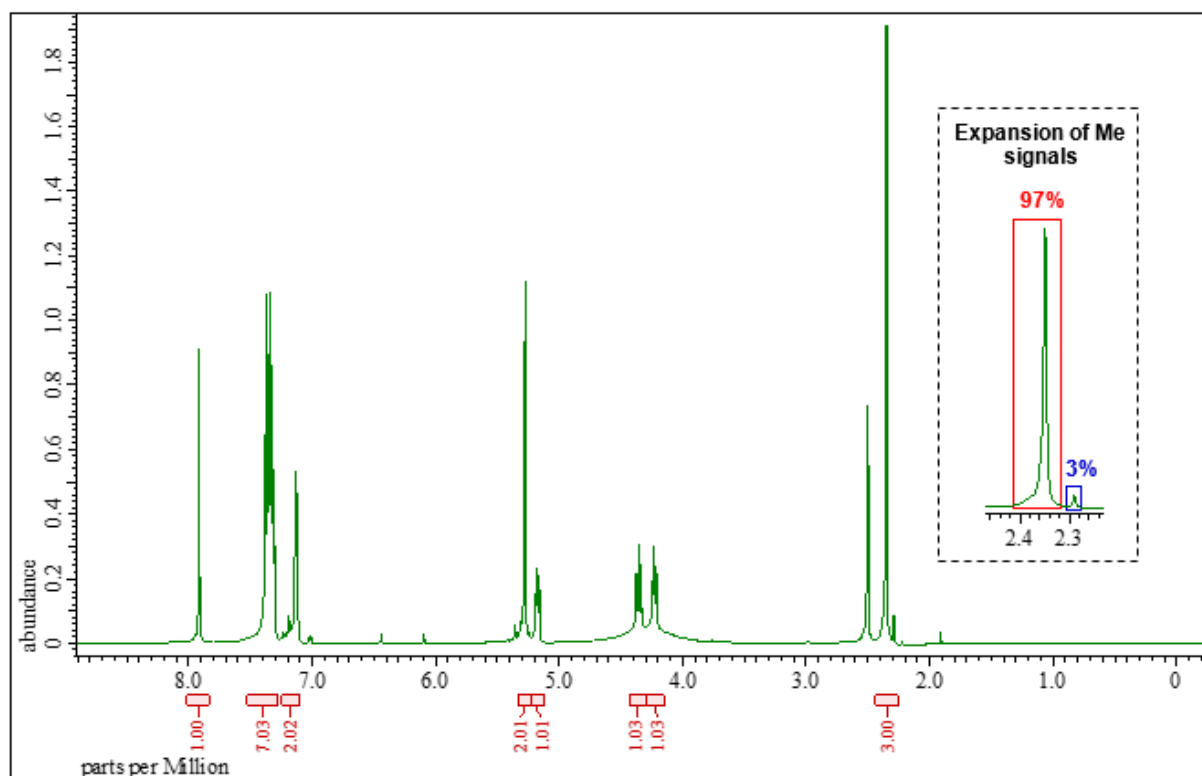

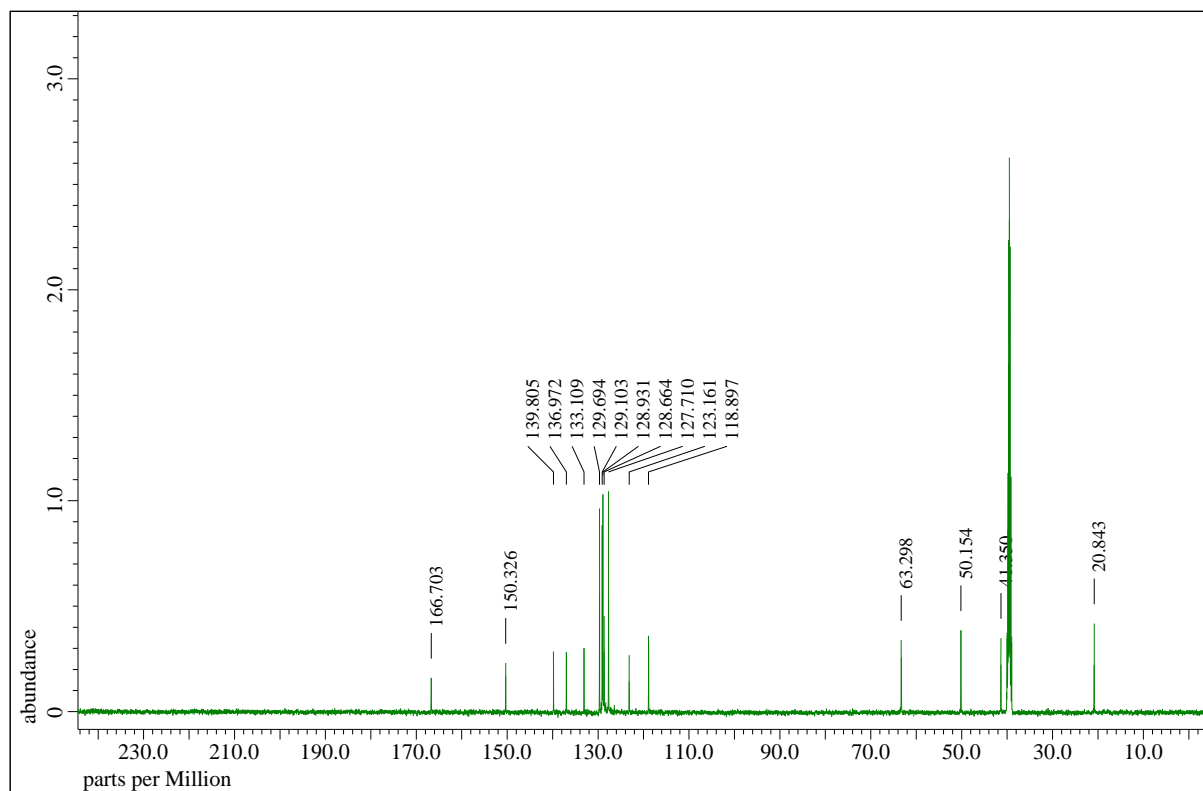

**2-(3-benzyl-2-thioxo-6-(*p*-tolyl)-2,3-dihydro-1*H*-imidazol-1-yl)acrylic acid 9{2,2}**

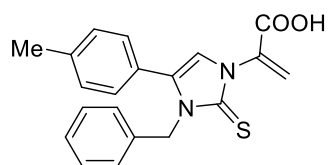

NMR: Mixture with 3% of **8{2,2}**.  $^1\text{H}$  NMR (500 MHz,  $\text{DMSO-}d_6$ ):  $\delta$  = 7.35 (s, 1H), 7.15-7.26 (m, 7H), 7.01 (d,  $J$  = 7.2 Hz, 2H), 6.46 (d,  $J$  = 0.7 Hz, 1H), 6.12 (d,  $J$  = 0.7 Hz, 1H), 5.35 (s, 2H), 2.29 (s, 3H).  $^{13}\text{C}$  NMR (126 MHz,  $\text{DMSO-}d_6$ ):  $\delta$  = 164.30, 163.15, 138.53, 136.71, 136.58, 130.51, 129.33, 128.42, 128.35, 127.14, 126.45, 125.24, 125.04, 116.90, 47.96, 20.76. HRMS (ESI-TOF, pos.):  $m/z$  calcd for  $\text{C}_{20}\text{H}_{19}\text{N}_2\text{O}_2\text{S}$   $[\text{M}+\text{H}]^+$  351.1162, found 351.1165.

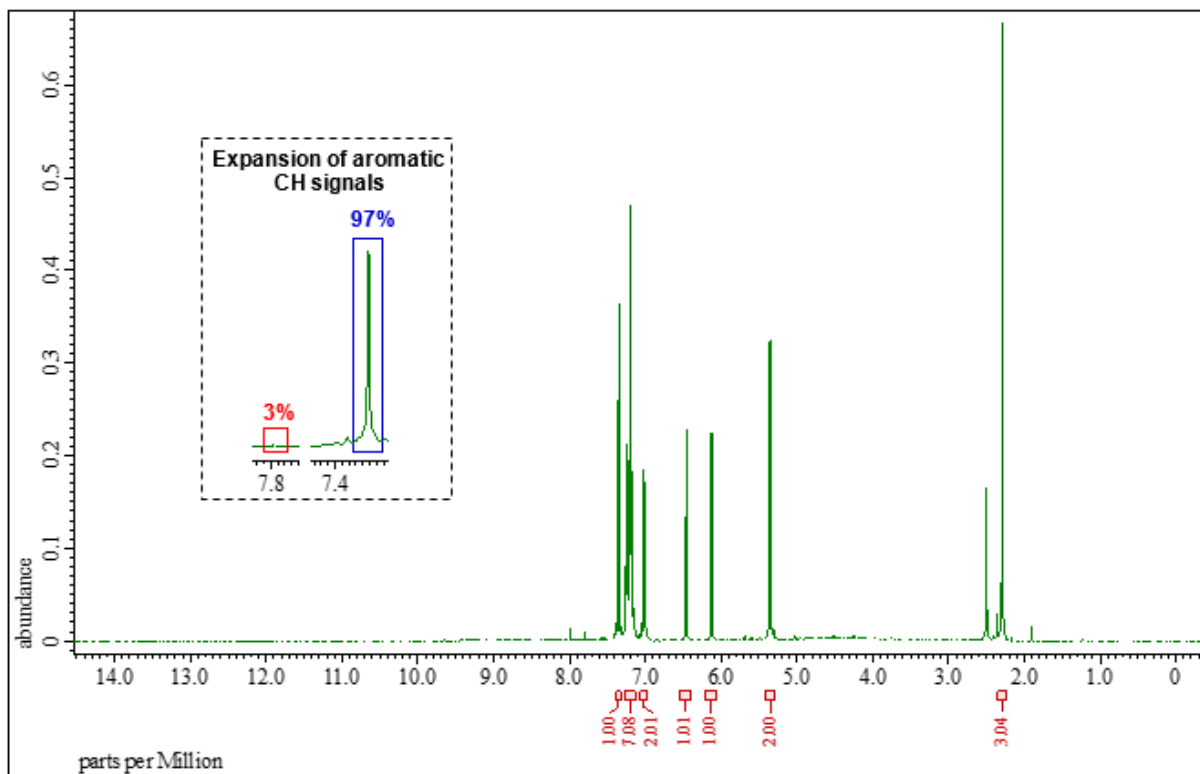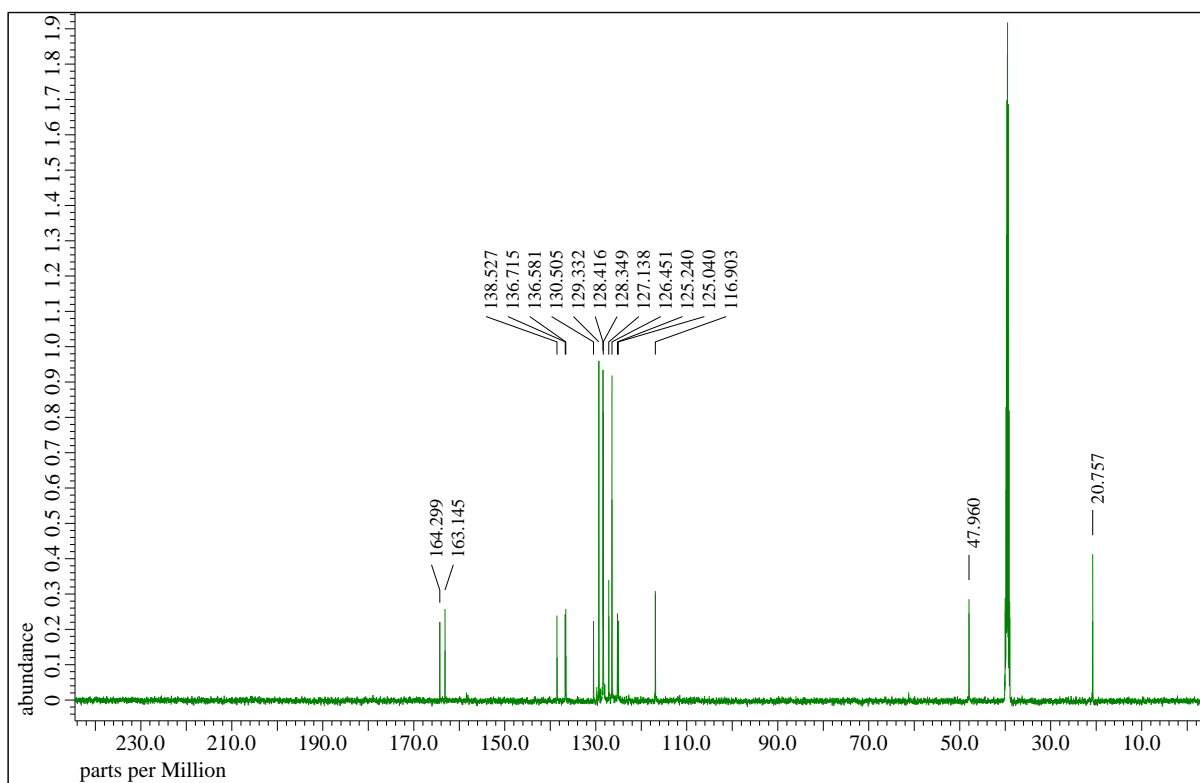

**(3R)-7-(cyclohexylmethyl)-6-(p-tolyl)-2,3-dihydroimidazo[2,1-b]thiazol-7-ium-3-carboxylate  
8{2,5}**

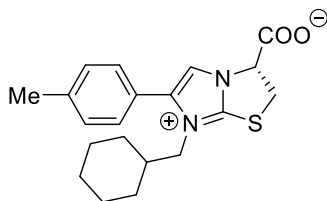

Crème amorphous solid, 13.3 mg (49%, 0.038 mmol). Cleaved from 135.7 mg of resin **2{2,5}** (0.565 mmol/g, 0.077 mmol of substrate). HPLC purity 99%.  $^1\text{H}$  NMR (500 MHz,  $\text{DMSO-}d_6$ ):  $\delta$  = 7.71 (s, 1H), 7.41 (br. d,  $J$  = 8.0 Hz, 2H), 7.35 (br. d,  $J$  = 8.0 Hz, 2H), 5.00 (dd,  $J$  = 8.6, 5.4 Hz, 1H), 4.36 (dd,  $J$  = 11.1, 8.6 Hz, 1H), 4.25 (q,  $J$  = 11.1, 5.4 Hz, 1H), 3.85 (d,  $J$  = 7.2 Hz, 2H), 2.36 (s, 3H), 1.37-1.54 (m, 6H), 0.96-1.00 (m, 3H), 0.69-0.78 (m, 2H).  $^{13}\text{C}$  NMR (126 MHz,  $\text{DMSO-}d_6$ ):  $\delta$  = 167.26, 150.22, 140.27, 137.29, 130.30, 129.60, 124.12, 119.33, 64.55, 53.29, 41.91, 37.37, 29.95, 25.87, 25.33, 21.40. HRMS (ESI-TOF, pos.):  $m/z$  calcd for  $\text{C}_{20}\text{H}_{25}\text{N}_2\text{O}_2\text{S}$   $[\text{M}+\text{H}]^+$  357.1631, found 357.1630.

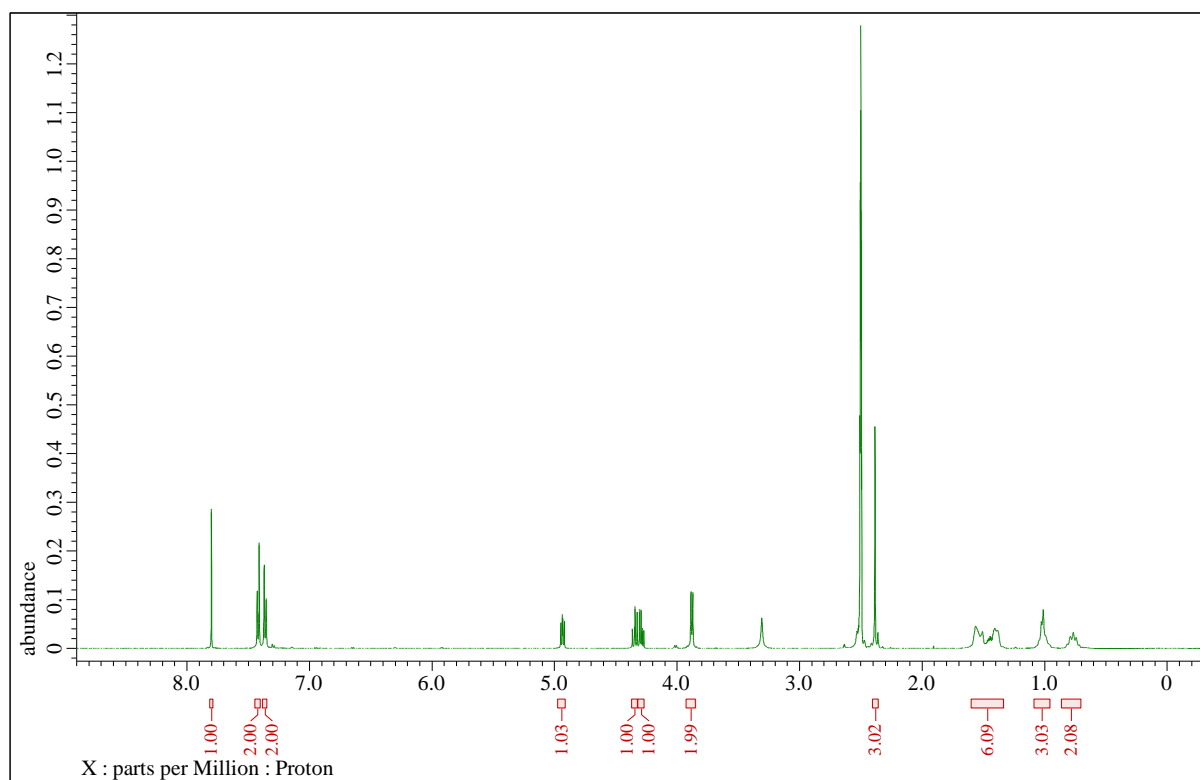

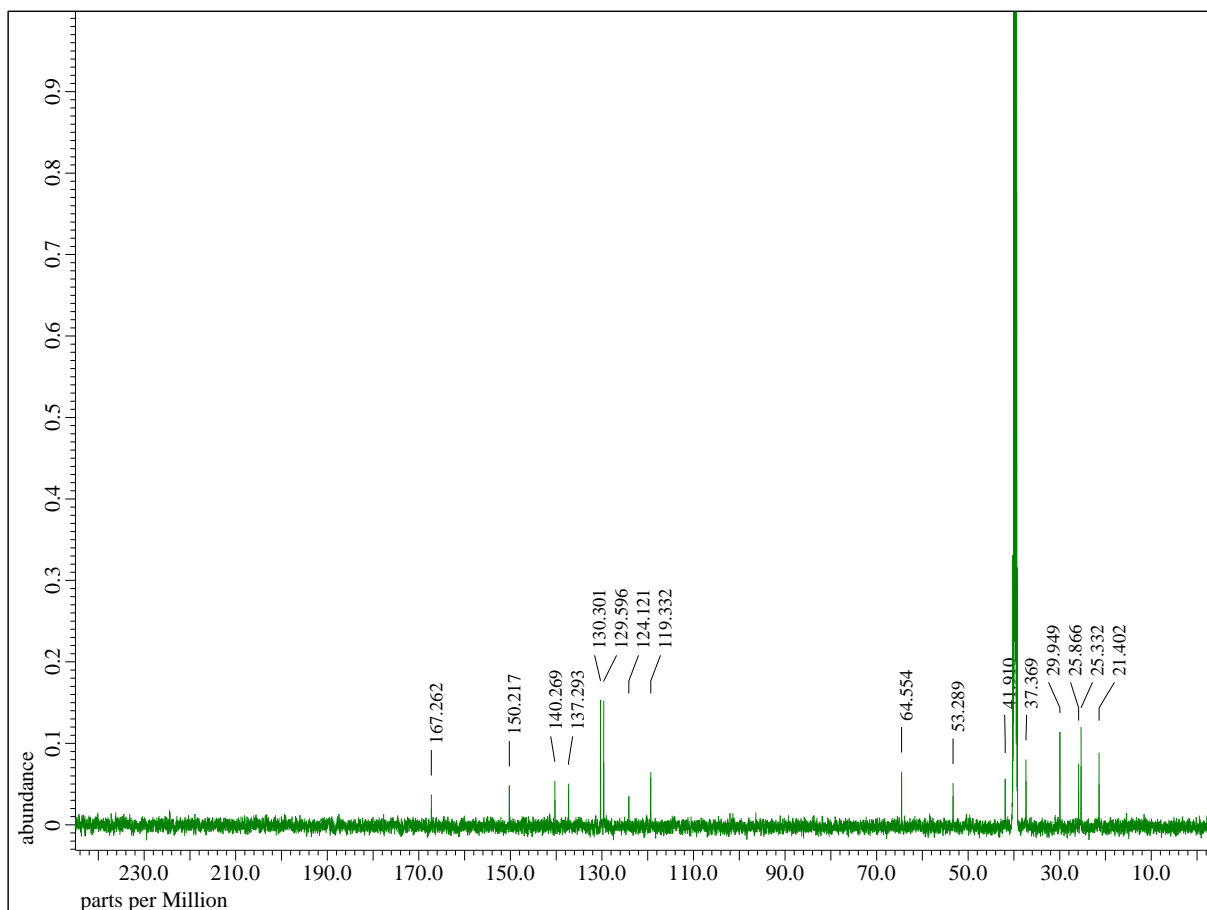

**(3R)-7-allyl-6-(4-methoxyphenyl)-2,3-dihydroimidazo[2,1-*b*]thiazol-7-ium-3-carboxylate  
8{3,3}**

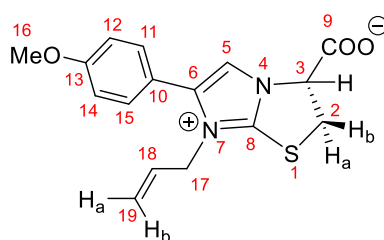

NMR: Mixture with 16% of **9**{3,3}. Creme amorphous solid, yield 25.3 mg (32%, 0.080 mmol) of which **8** 22.3 mg (28%, 0.071 mmol) and **9** 3.0 mg (4%, 0.009 mmol). Cleaved from 443.8 mg of resin **2**{3,3} (0.575 mmol/g, 0.255 mmol of substrate). HPLC purity 99%. <sup>1</sup>H NMR (500 MHz, DMSO-*d*<sub>6</sub>):  $\delta$  = 7.85 (s, 1H, HC<sup>5</sup>), 7.43 (br. d,  $J$  = 8.8 Hz, 2H, HC<sup>11,15</sup>), 7.09 (br. d,  $J$  = 8.8 Hz, 2H, HC<sup>12,14</sup>), 5.86-5.94 (m, 1H, HC<sup>18</sup>), 5.32 (br. d,  $J$  = 10.4 Hz, 1H, H<sub>b</sub>C<sup>19</sup>), 5.15 (dd,  $J$  = 8.7, 5.4 Hz, 1H, HC<sup>3</sup>), 5.12 (br. d,  $J$  = 17.2 Hz, 1H, H<sub>a</sub>C<sup>19</sup>), 4.61 (ddd,  $J$  = 5.0, 1.8, 1.8 Hz, 2H, HC<sup>17</sup>), 4.39 (dd,  $J$  = 11.2, 8.7 Hz, 1H, H<sub>b</sub>C<sup>2</sup>), 4.27 (dd,  $J$  = 11.2, 5.4 Hz, 1H, H<sub>a</sub>C<sup>2</sup>), 3.82 (s, 3H, HC<sup>16</sup>). <sup>13</sup>C NMR (126 MHz, DMSO-*d*<sub>6</sub>):  $\delta$  = 167.19 (C<sup>9</sup>), 161.01 (C<sup>13</sup>), 150.37 (C<sup>8</sup>), 137.31 (C<sup>6</sup>), 131.19 (C<sup>11,15</sup>), 130.80 (C<sup>18</sup>), 120.10 (C<sup>5</sup>), 118.91 (C<sup>19</sup>), 118.65 (C<sup>10</sup>), 115.17 (C<sup>12,14</sup>), 64.03 (C<sup>3</sup>), 55.92 (C<sup>16</sup>), 49.45 (C<sup>17</sup>), 41.99 (C<sup>2</sup>). HRMS (ESI-TOF, pos.):  $m/z$  calcd for C<sub>16</sub>H<sub>17</sub>N<sub>2</sub>O<sub>3</sub>S [M+H]<sup>+</sup> 317.0954, found 317.0957.

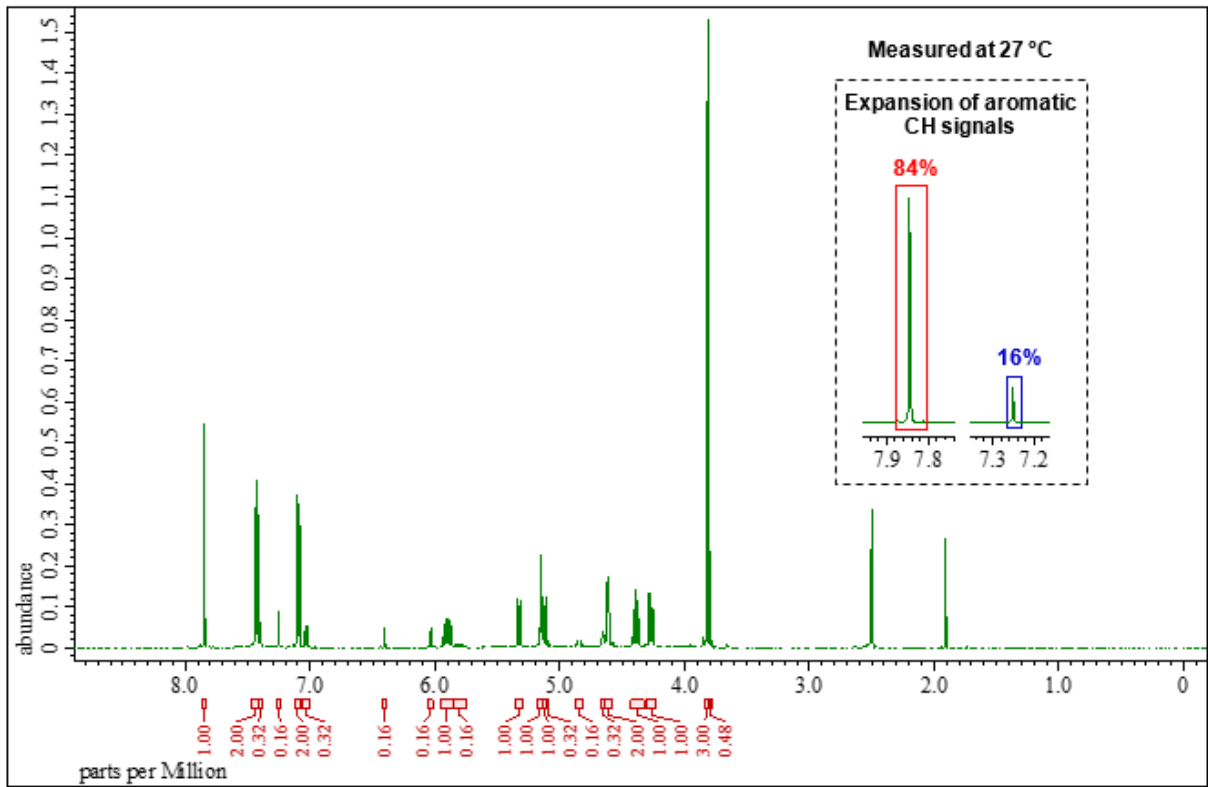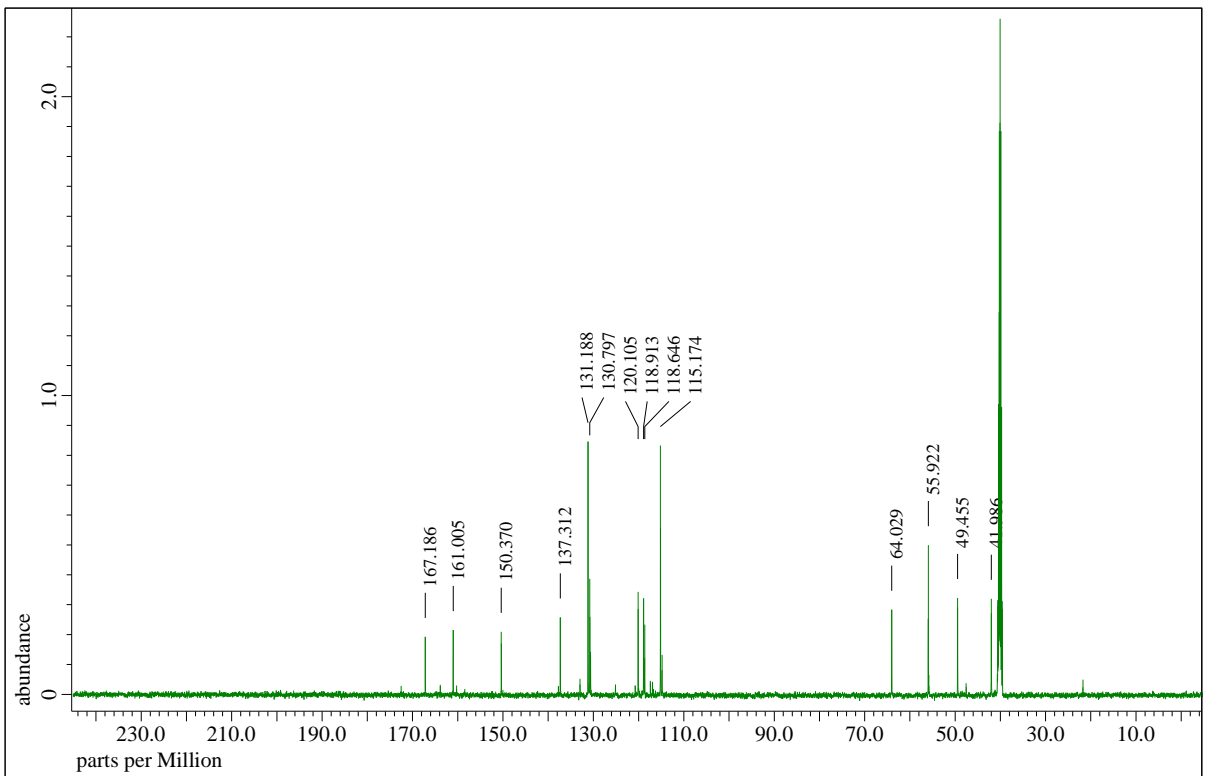

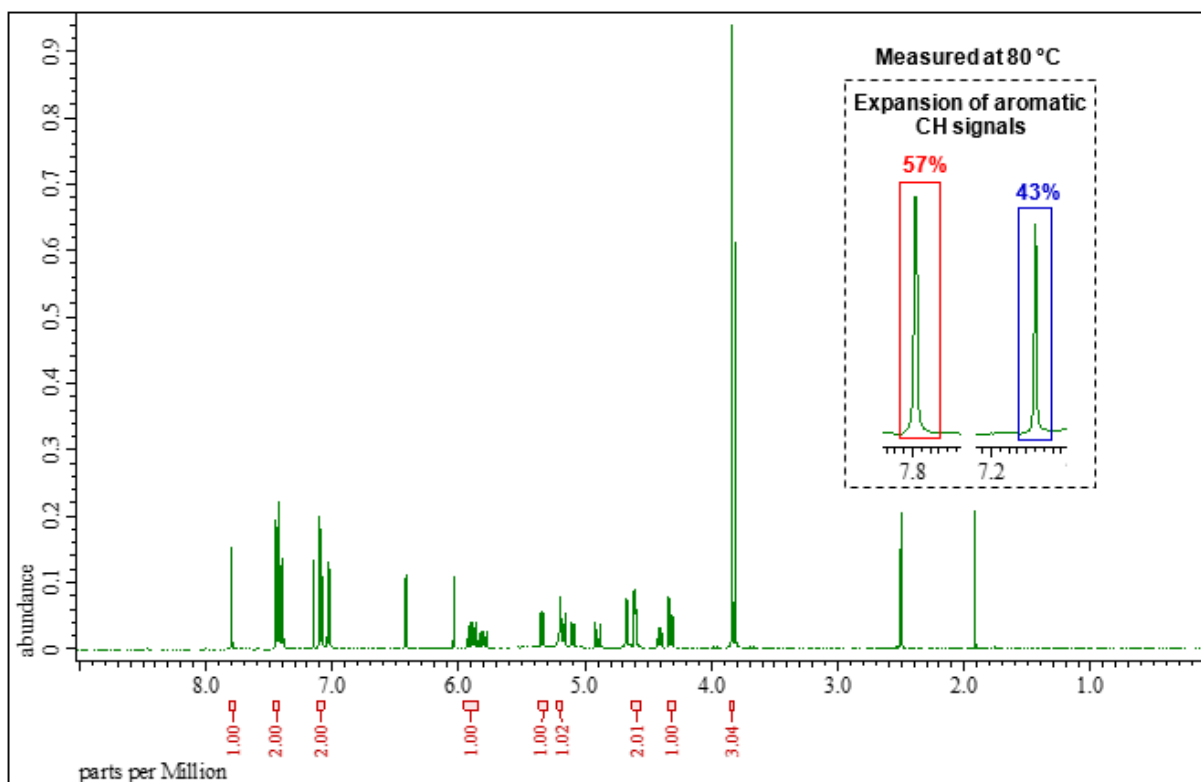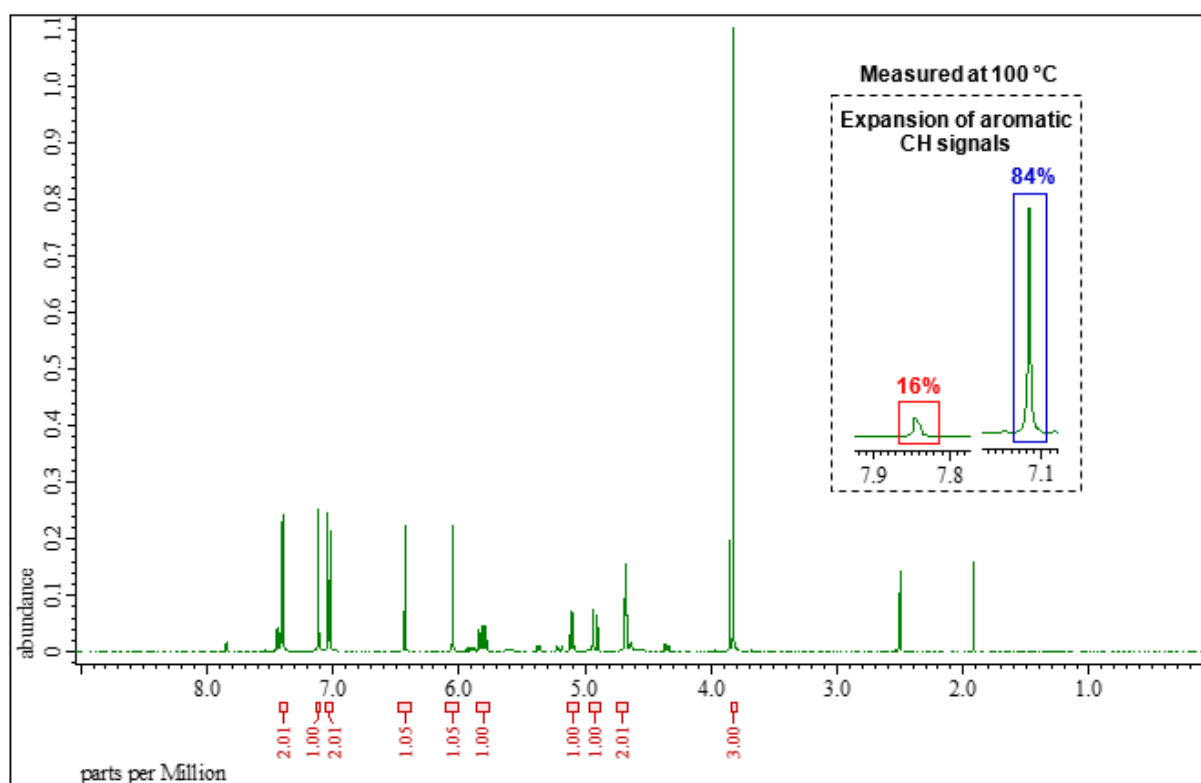

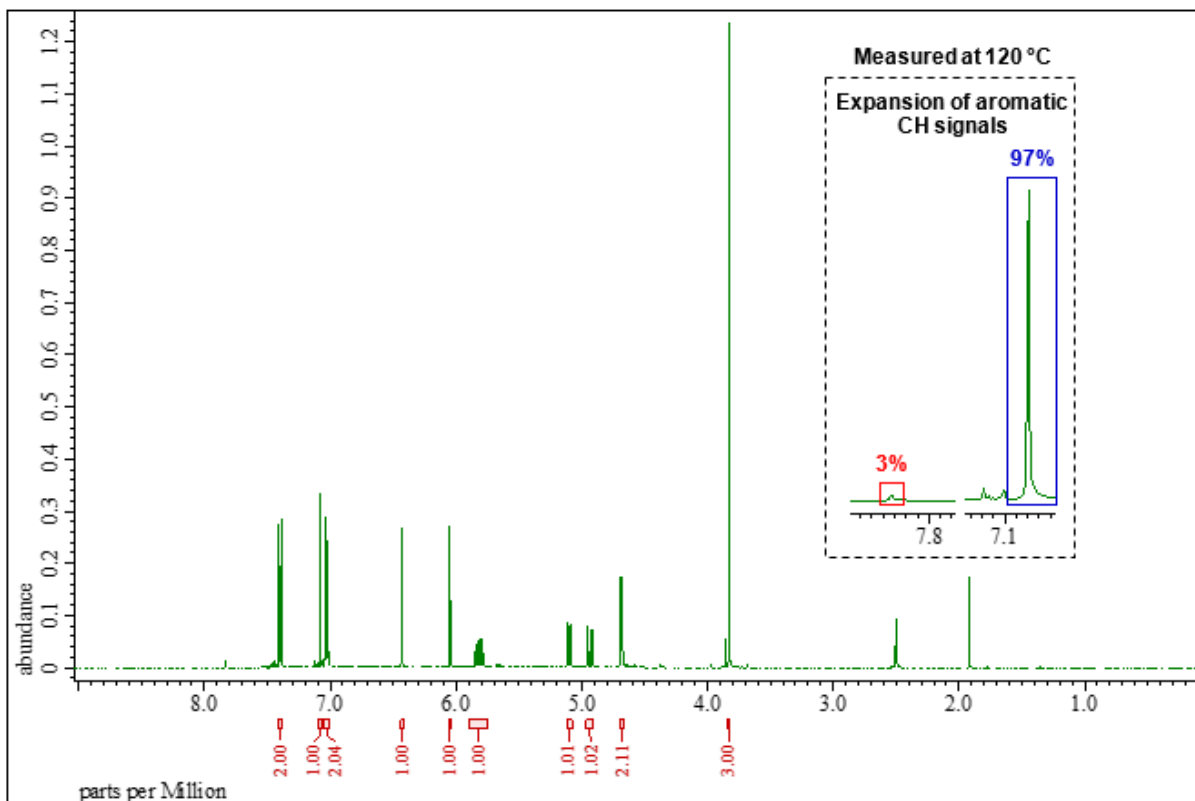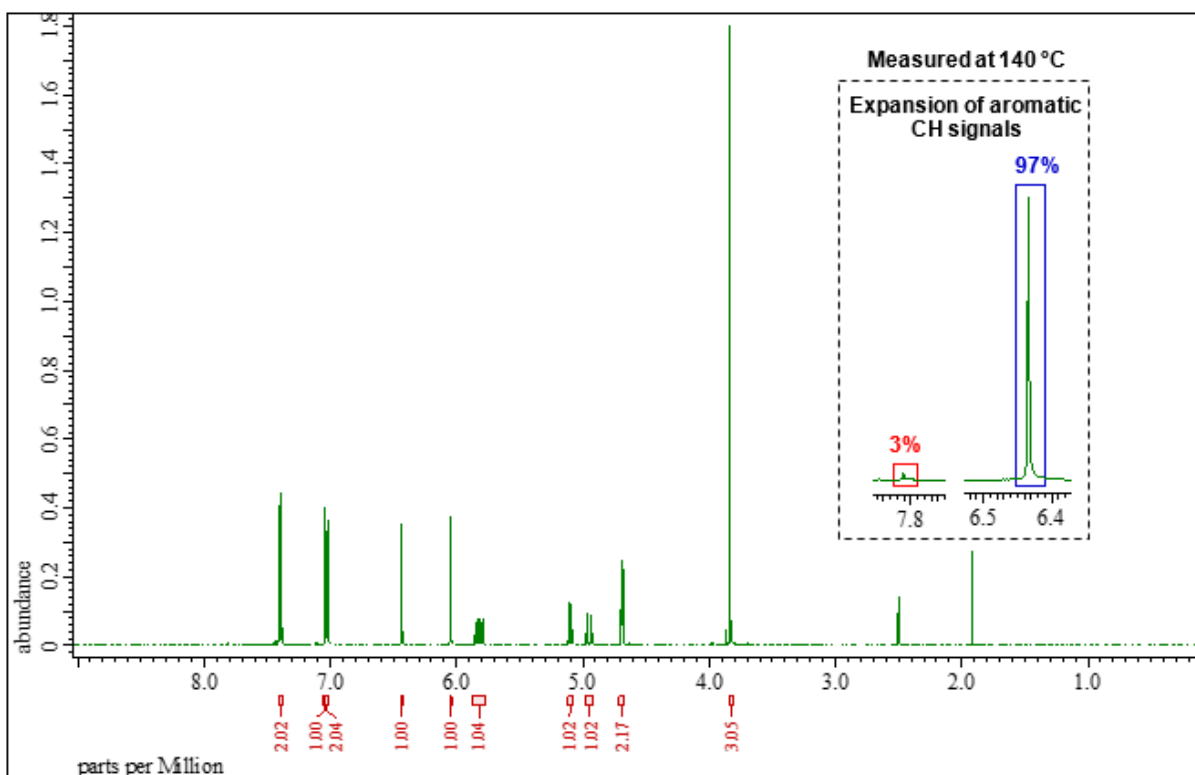



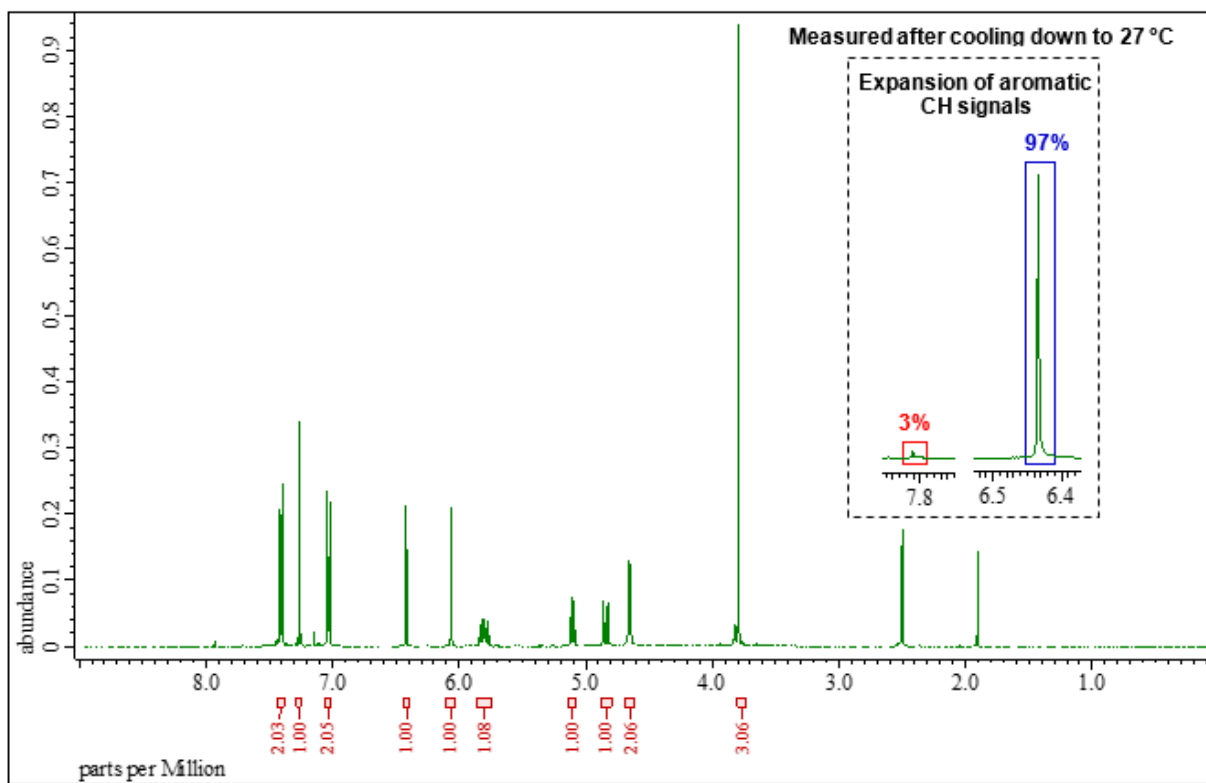

**2-(3-allyl-4-(4-methoxyphenyl)-2-thioxo-2,3-dihydro-1H-imidazol-1-yl)acrylic acid **9**{3,3}**

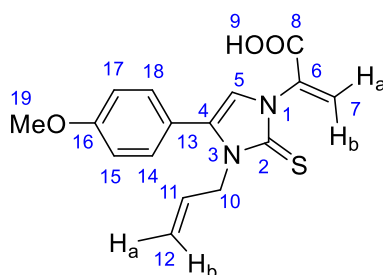

NMR: Mixture with 3% of **8**{3,3}. Creme amorphous solid, 25.3 mg (32%, 0.080 mmol) of which **8**{3,3} 0.8 mg (1%, 0.003 mmol) and **9**{3,3} 24.5 mg (31%, 0.078 mmol).  $^1\text{H}$  NMR (500 MHz,  $\text{DMSO-}d_6$ ):  $\delta$  = 12.93 (br. s, 1H,  $\text{HO}^9$ ), 7.40 (br. d,  $J$  = 8.8 Hz, 2H,  $\text{HC}^{14,18}$ ), 7.26 (s, 1H,  $\text{HC}^5$ ), 7.03 (br. d,  $J$  = 8.8 Hz, 2H,  $\text{HC}^{15,17}$ ), 6.42 (d,  $J$  = 0.7 Hz, 1H,  $\text{H}_a\text{C}^7$ ), 6.06 (d,  $J$  = 0.7 Hz, 1H,  $\text{H}_b\text{C}^7$ ), 5.76-5.85 (m, 1H,  $\text{HC}^{11}$ ), 5.10 (br. d,  $J$  = 10.4 Hz, 1H,  $\text{H}_b\text{C}^{12}$ ), 4.84 (br. d,  $J$  = 17.2 Hz, 1H,  $\text{H}_a\text{C}^{12}$ ), 4.65 (ddd,  $J$  = 4.8, 1.6, 1.6 Hz, 2H,  $\text{HC}^{10}$ ), 3.79 (s, 3H,  $\text{HC}^{19}$ ).  $^{13}\text{C}$  NMR (126 MHz,  $\text{DMSO-}d_6$ ):  $\delta$  = 163.36 (C2), 163.15 (C8), 159.73 (C16), 136.67 (C6), 132.36 (C11), 130.25 (C4), 130.12 (C14,18), 125.04 (C7), 120.13 (C13), 116.86 (C12), 116.29 (C5), 114.26 (C15,17), 55.24 (C19), 47.00 (C10).  $^{15}\text{N}$  NMR (51 MHz,  $\text{DMSO-}d_6$ ):  $\delta$  = 172.4 (N1), 166.6 (N3). HRMS (ESI-TOF, pos.):  $m/z$  calcd for  $\text{C}_{16}\text{H}_{17}\text{N}_2\text{O}_3\text{S}$   $[\text{M}+\text{H}]^+$  317.0954, found 317.0957.

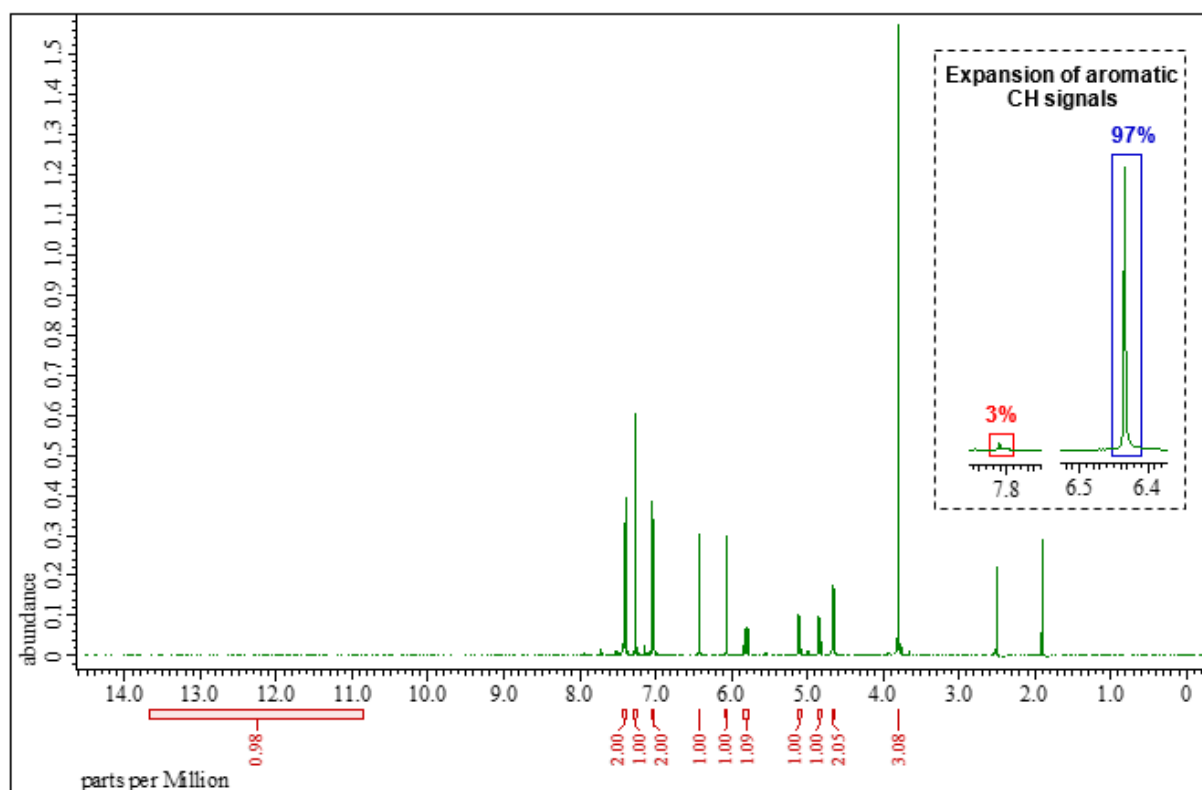

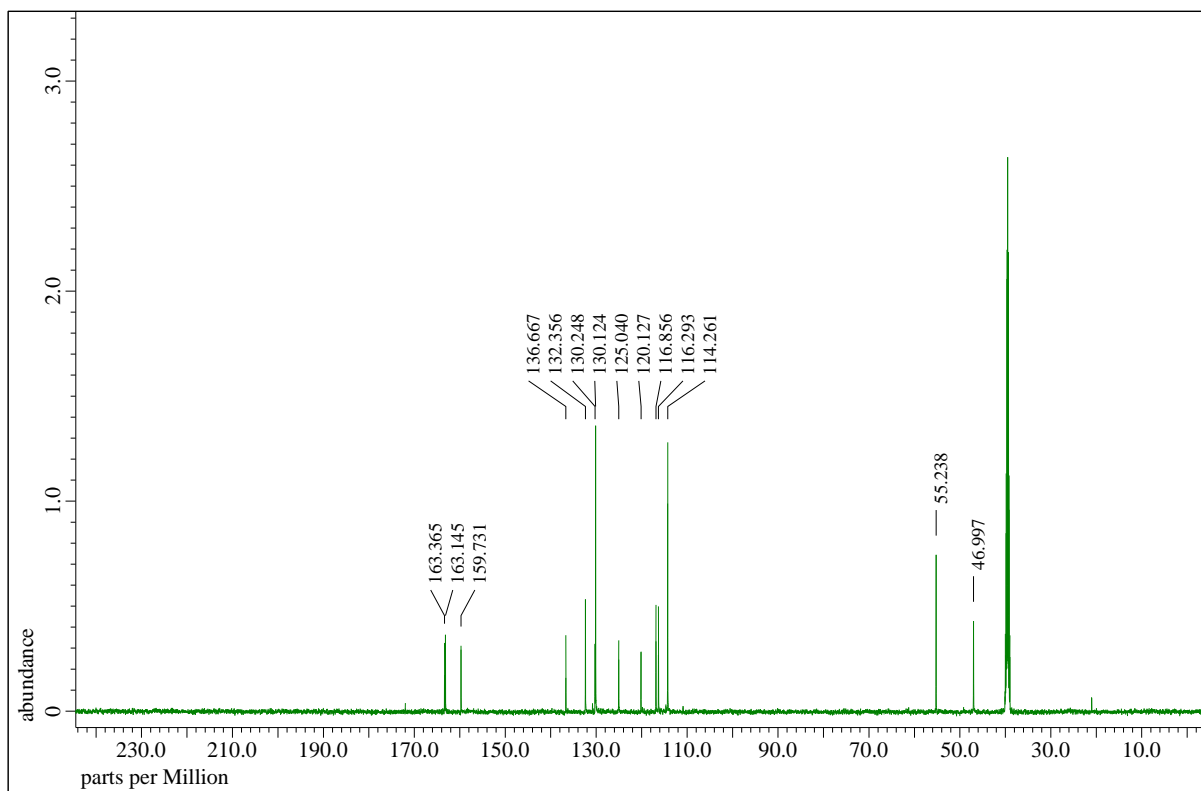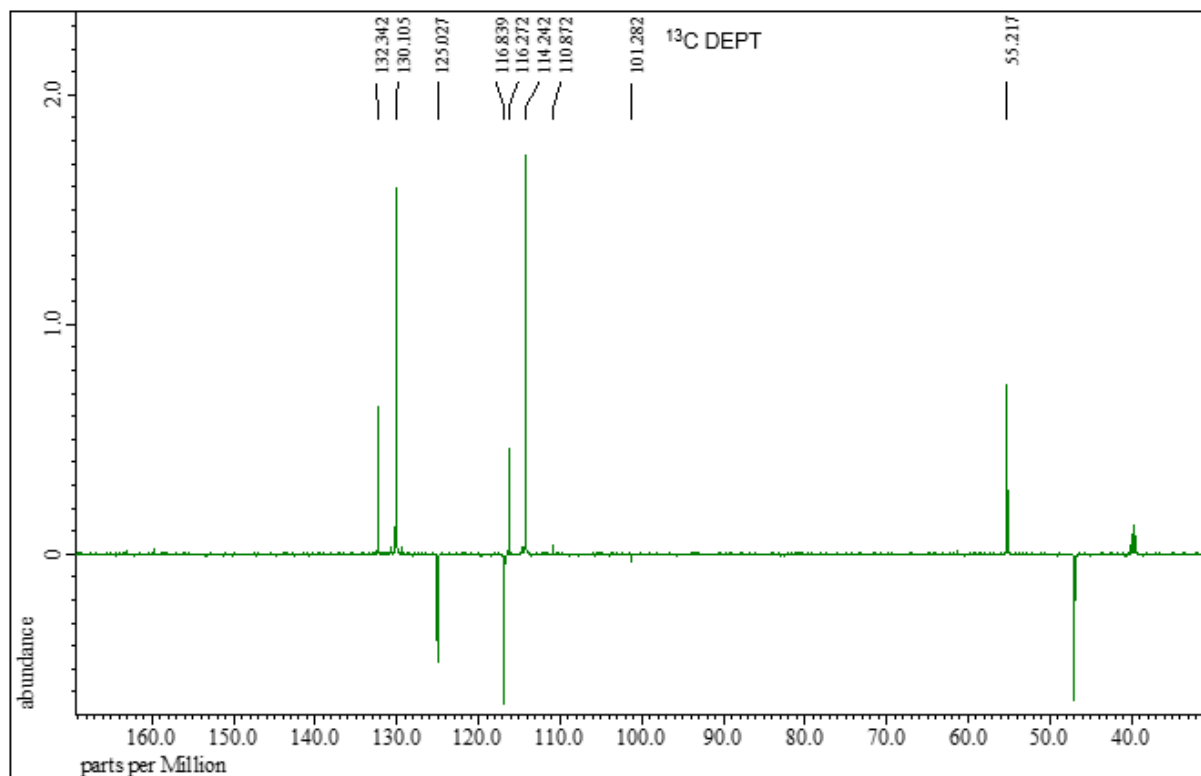

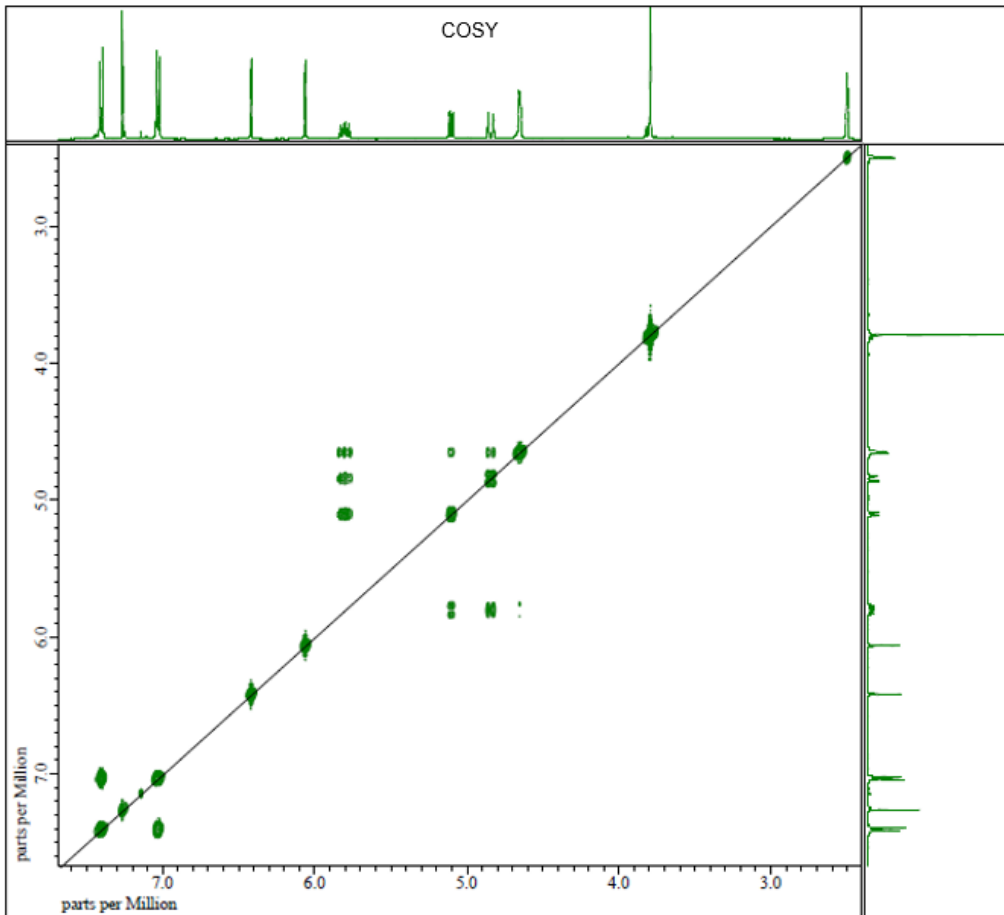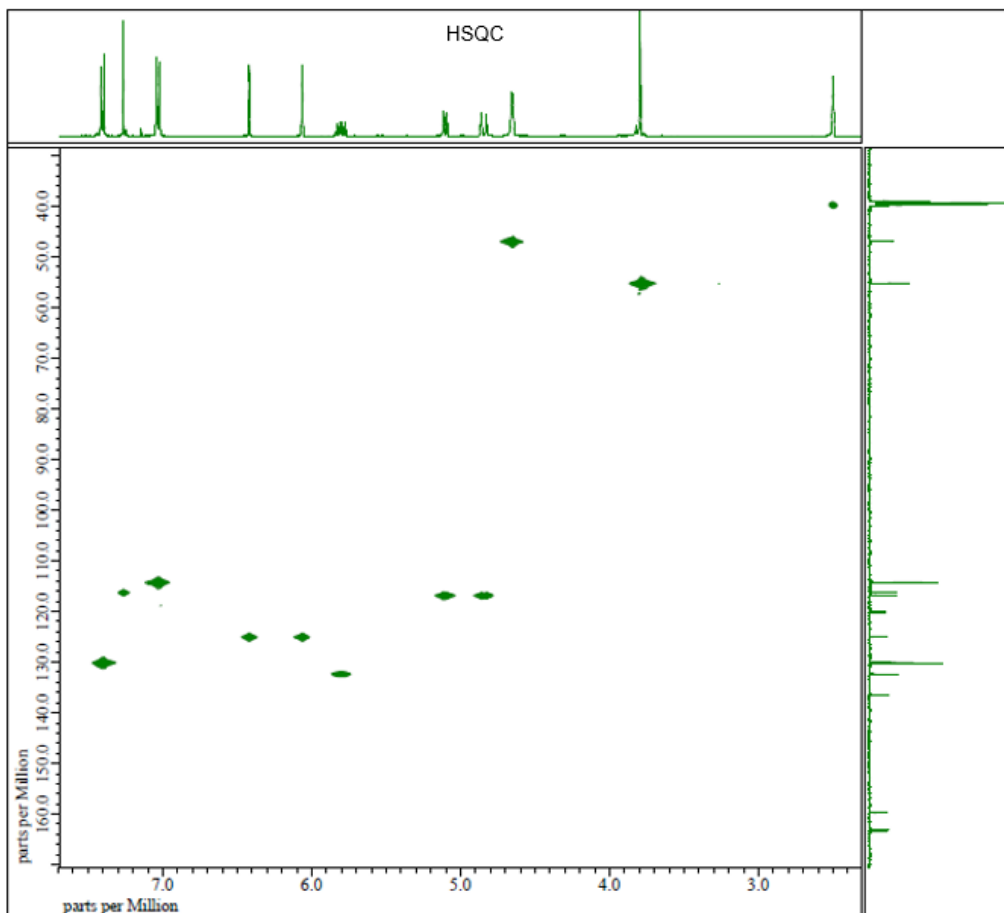

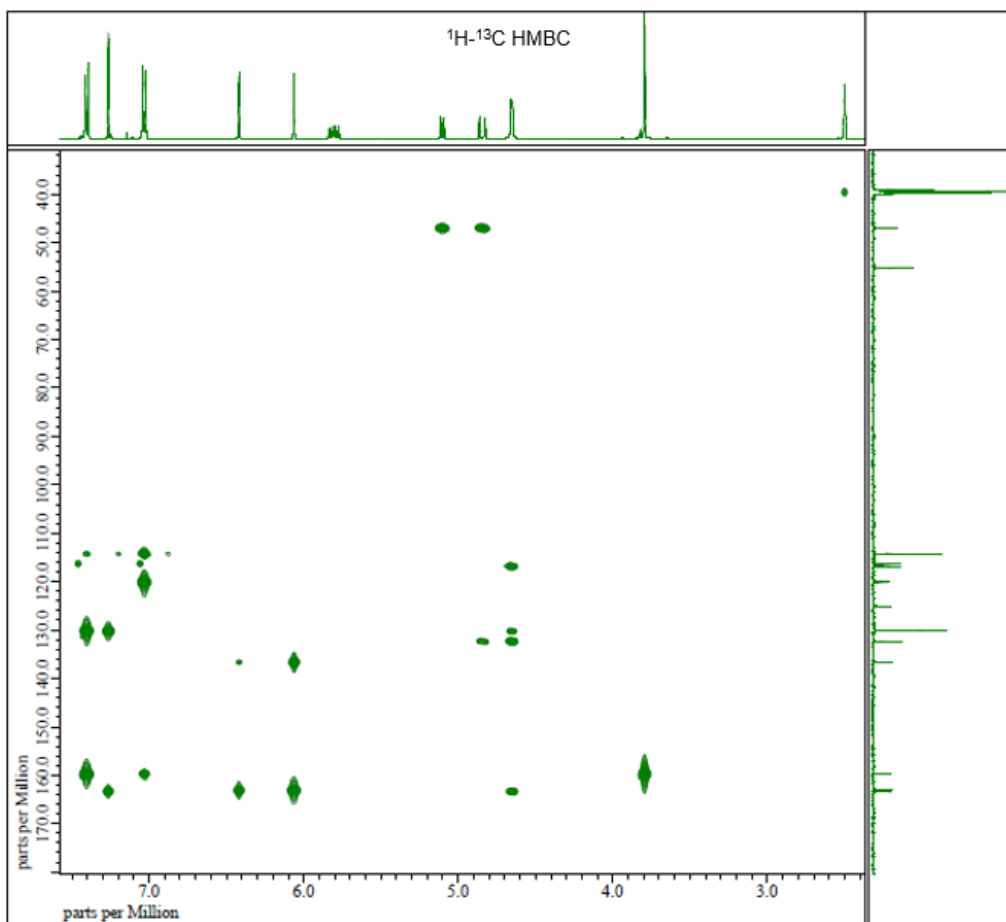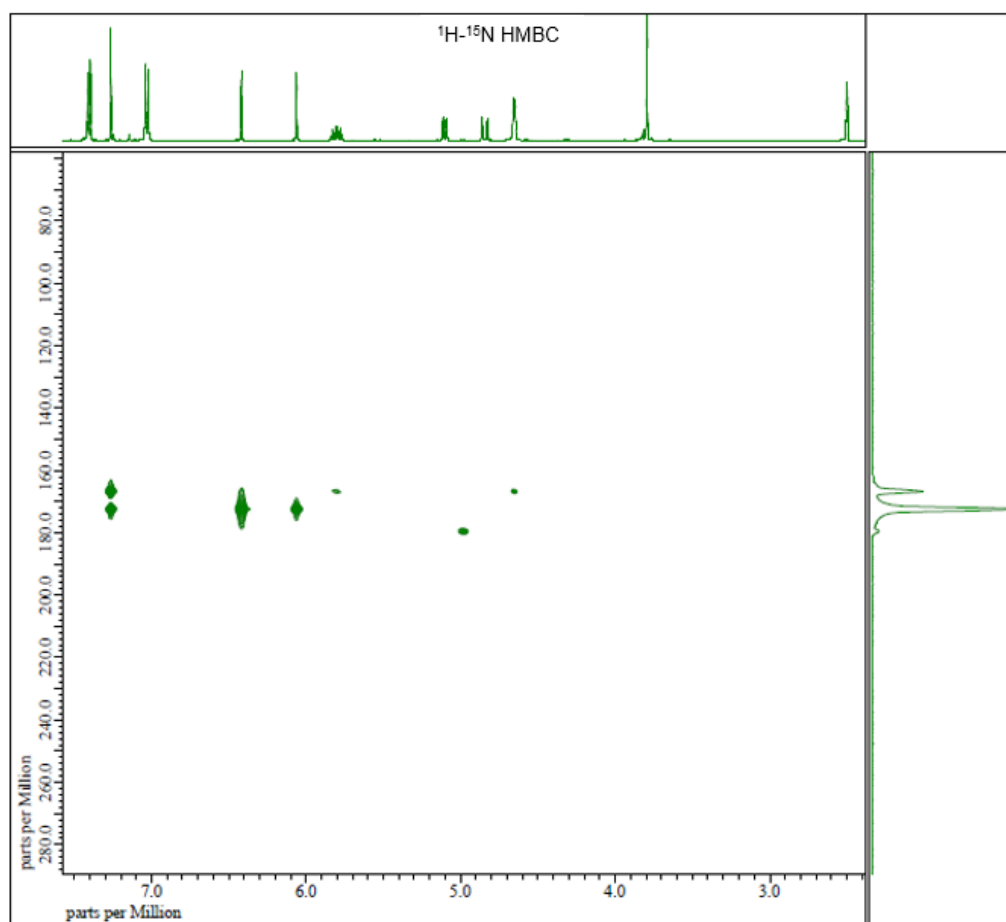

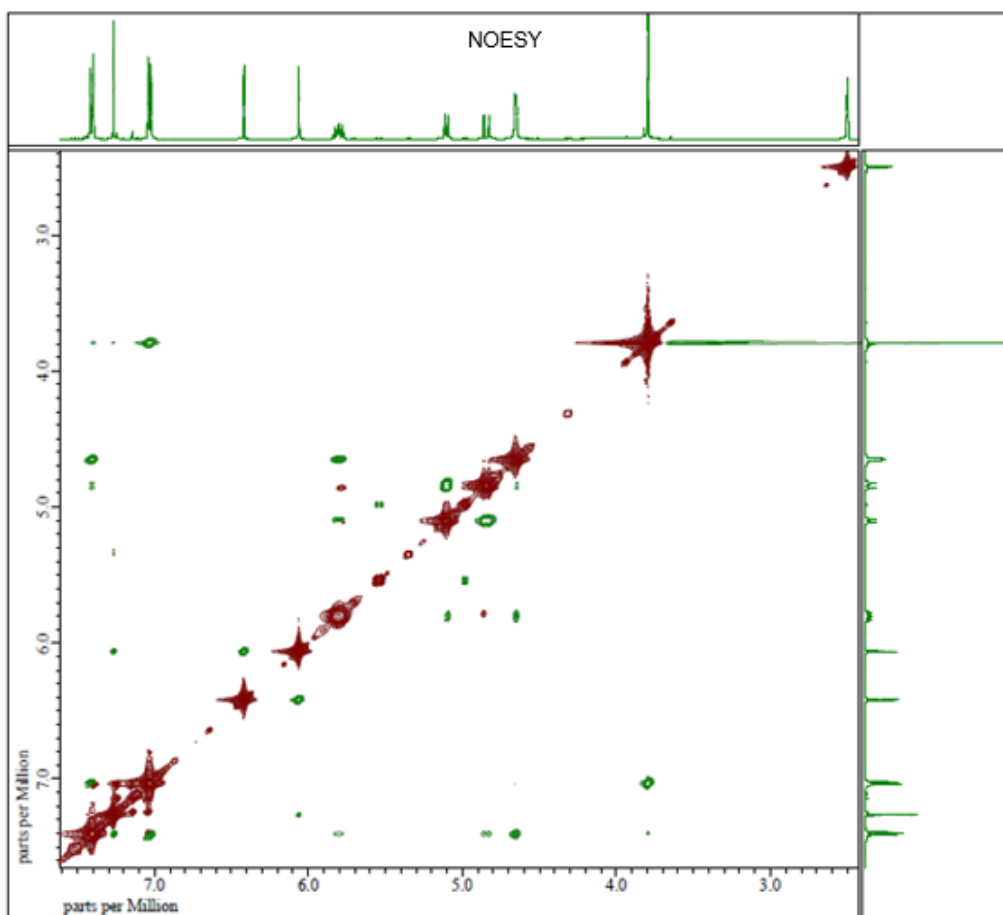

**(3R)-7-ethyl-6-(4-methoxyphenyl)-2,3-dihydroimidazo[2,1-b]thiazol-7-ium-3-carboxylate 8{3,4}**

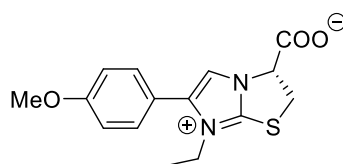

Creme amorphous solid, 19.3 mg (59%, 0.063 mmol). Cleaved from 186.1 mg of resin **2{3,4}** (0.575 mmol/g, 0.107 mmol of substrate). HPLC purity 99%.  $^1\text{H}$  NMR (500 MHz,  $\text{DMSO-}d_6$ ):  $\delta$  = 7.76 (s, 1H), 7.46 (br. d,  $J$  = 8.8 Hz, 2H), 7.11 (br. d,  $J$  = 8.8 Hz, 2H), 4.93 (dd,  $J$  = 8.4, 6.4 Hz, 1H), 4.34 (dd,  $J$  = 11.1, 8.4 Hz, 1H), 4.30 (dd,  $J$  = 11.1, 6.4 Hz, 1H), 3.99 (q,  $J$  = 7.3 Hz, 2H), 3.82 (s, 3H), 1.19 (t,  $J$  = 7.3 Hz, 3H).  $^{13}\text{C}$  NMR (126 MHz,  $\text{DMSO-}d_6$ ):  $\delta$  = 165.47, 160.33, 148.37, 136.04, 130.69, 118.59, 118.39, 114.60, 63.97, 55.32, 42.23, 41.48, 13.85. HRMS (ESI-TOF, pos.):  $m/z$  calcd for  $\text{C}_{15}\text{H}_{17}\text{N}_2\text{O}_3\text{S}$   $[\text{M}+\text{H}]^+$  305.0954, found 305.0953.

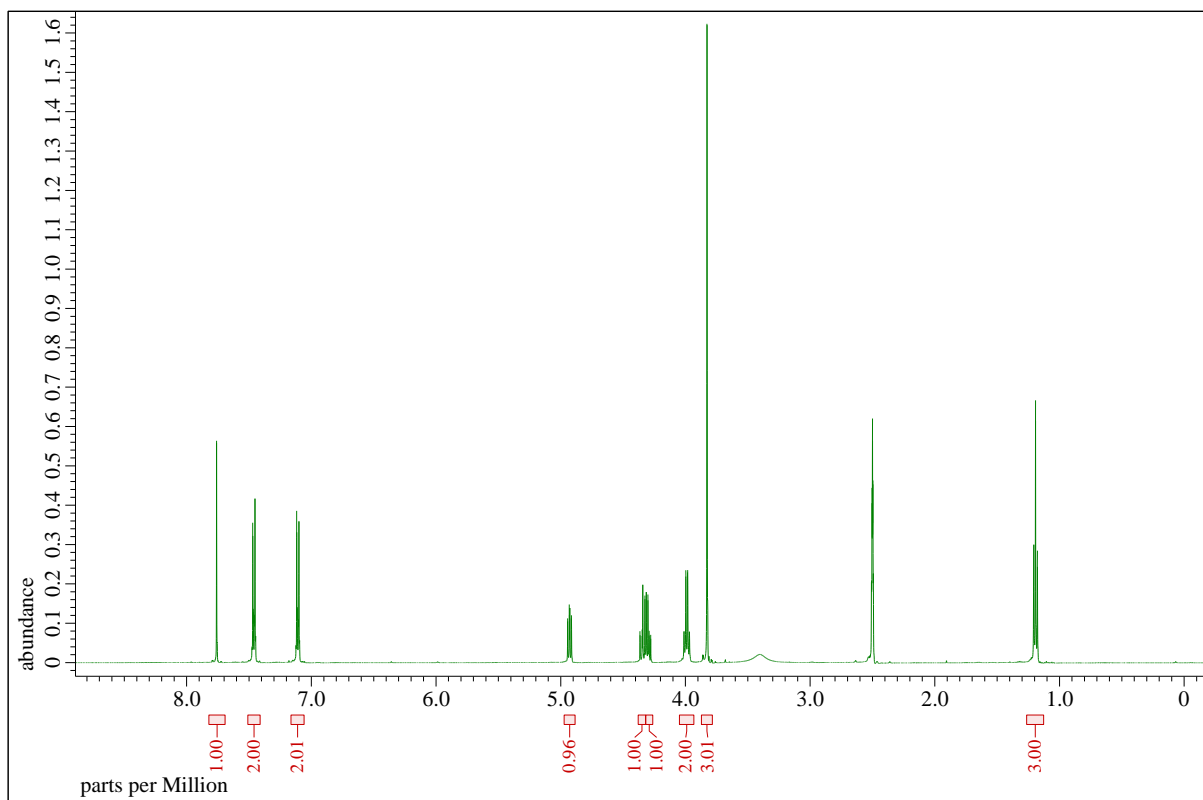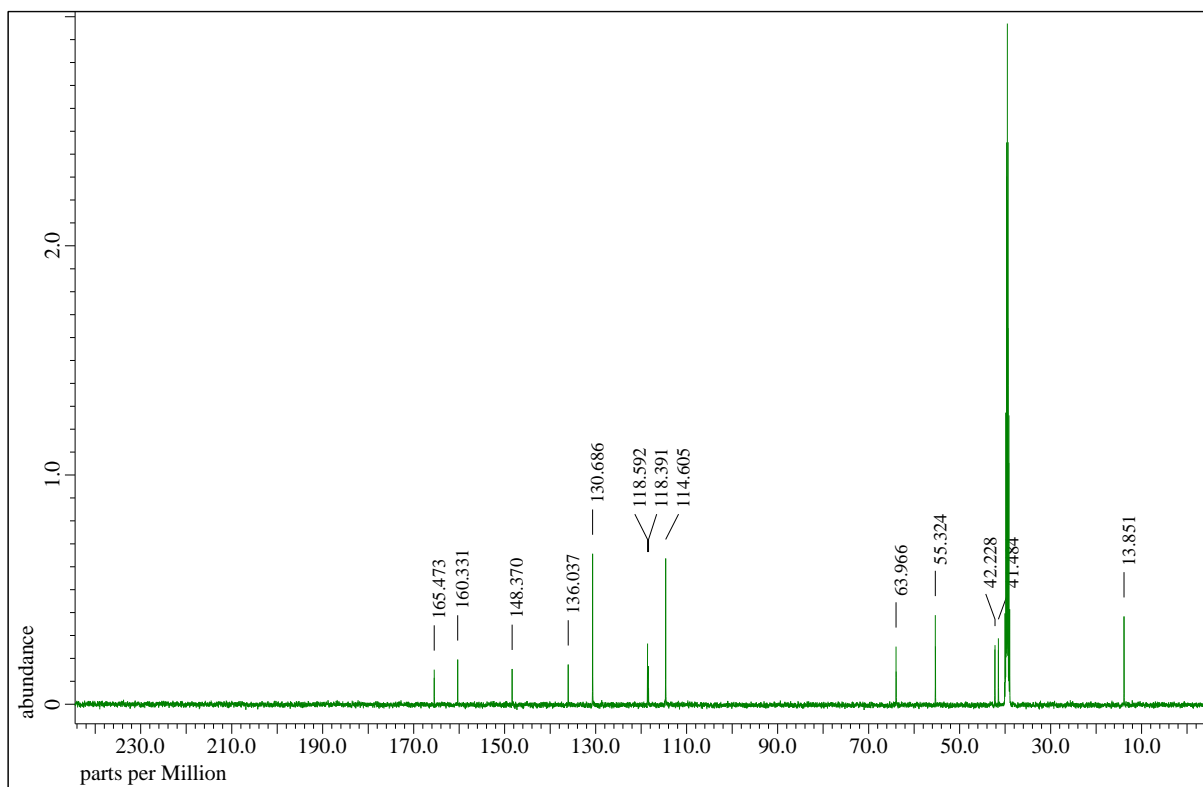

**2-(3-allyl-4-(4-methoxyphenyl)-2-thioxo-2,3-dihydro-1H-imidazol-1-yl)acrylic acid 9{3,4}**

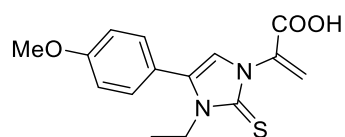

NMR: Mixture with 13% of **8**{3,4}.  $^1\text{H}$  NMR (500 MHz,  $\text{DMSO-}d_6$ ):  $\delta$  = 13.24 (br. s, 1H), 7.43 (br. d,  $J$  = 8.8 Hz, 2H), 7.22 (s, 1H), 7.07 (br. d,  $J$  = 8.8 Hz, 2H), 6.40 (d,  $J$  = 0.7 Hz, 1H), 6.04 (d,  $J$  = 0.7 Hz, 1H), 4.02 (q,  $J$  = 7.1 Hz, 2H), 3.81 (s, 3H), 1.11 (t,  $J$  = 7.1 Hz, 3H).  $^{13}\text{C}$  NMR (126 MHz,  $\text{DMSO-}d_6$ ):  $\delta$  = 163.16, 162.38, 159.75, 136.58, 130.51, 130.33, 129.81, 124.84, 120.17, 116.31, 114.38, 55.24, 13.40. HRMS (ESI-TOF, pos.):  $m/z$  calcd for  $\text{C}_{15}\text{H}_{17}\text{N}_2\text{O}_3\text{S}$   $[\text{M}+\text{H}]^+$  305.0954, found 305.0953.

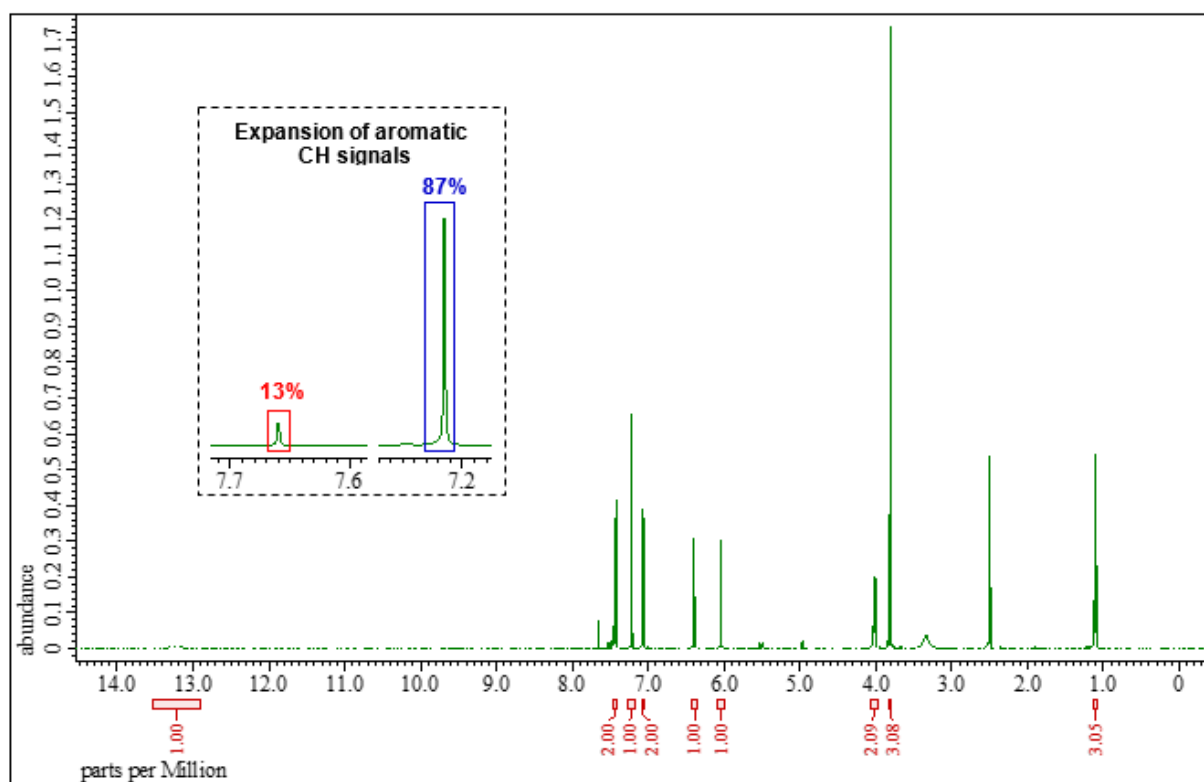



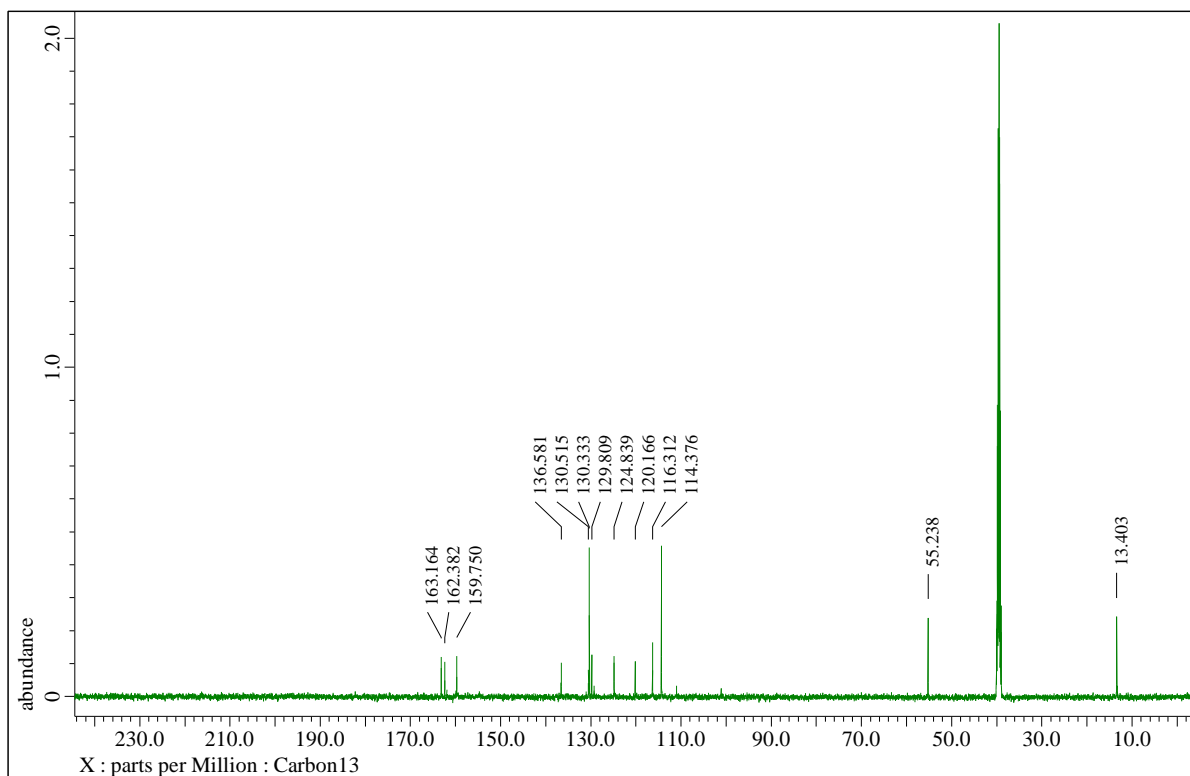

**(3R)-6-(4-methoxyphenyl)-7-(2-morpholinoethyl)-2,3-dihydroimidazo[2,1-b]thiazol-7-ium-3-carboxylate **8**{3,6}**

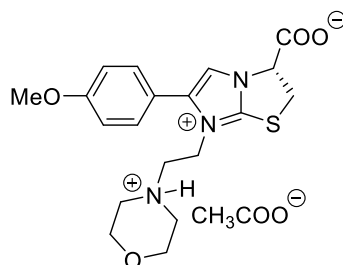

NMR: Mixture with 40% of **9**{3,6}. Creme amorphous solid, 18.6 mg (39%, 0.048 mmol) of which **8** 16.9 mg (36%, 0.043 mmol) and **9** 1.7 mg (3%, 0.004 mmol). Cleaved from 210.1 mg of resin **2**{3,6} (0.575 mmol/g, 0.121 mmol of substrate). HPLC purity 99%. <sup>1</sup>H NMR (500 MHz, DMSO-*d*<sub>6</sub>):  $\delta$  = 7.75 (s, 1H), 7.47 (br. d, *J* = 8.8 Hz, 2H), 7.10 (br. d, *J* = 8.8 Hz, 2H), 4.96 (dd, *J* = 8.4, 6.4 Hz, 1H), 4.30 (dd, *J* = 11.1, 8.4 Hz, 1H), 4.24 (dd, *J* = 11.1, 6.4 Hz, 1H), 4.04 (t, *J* = 5.5 Hz, 2H), 3.82 (s, 3H), 3.49 (t, *J* = 4.5 Hz, 4H), 2.43-2.46 (m, 2H), 2.21-2.29 (m, 4H). <sup>13</sup>C NMR (126 MHz, DMSO-*d*<sub>6</sub>):  $\delta$  = 165.88, 160.34, 149.71, 136.47, 130.91, 130.38, 118.44, 114.58, 65.89, 64.05, 56.09, 55.34, 53.15, 44.57, 41.29. HRMS (ESI-TOF, pos.): *m/z* calcd for C<sub>19</sub>H<sub>25</sub>N<sub>3</sub>O<sub>4</sub>S [M+H]<sup>+</sup> 390.1482, found 390.1481.

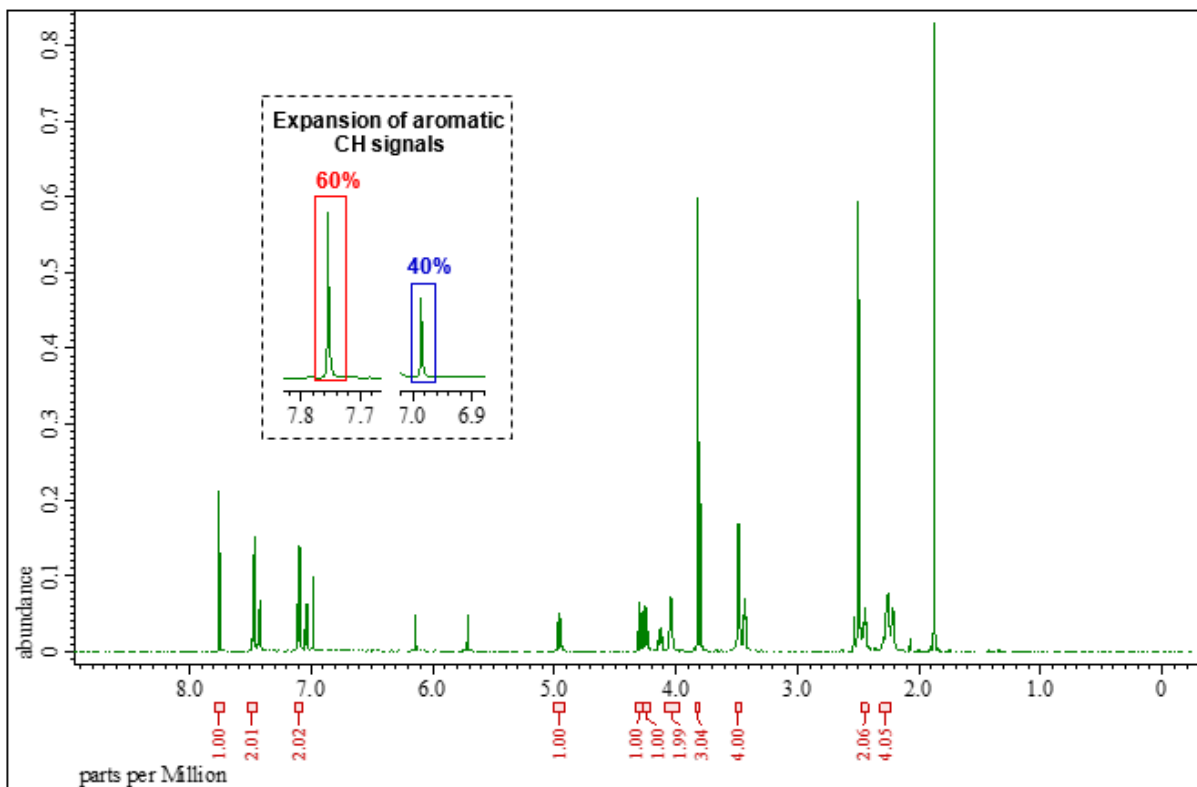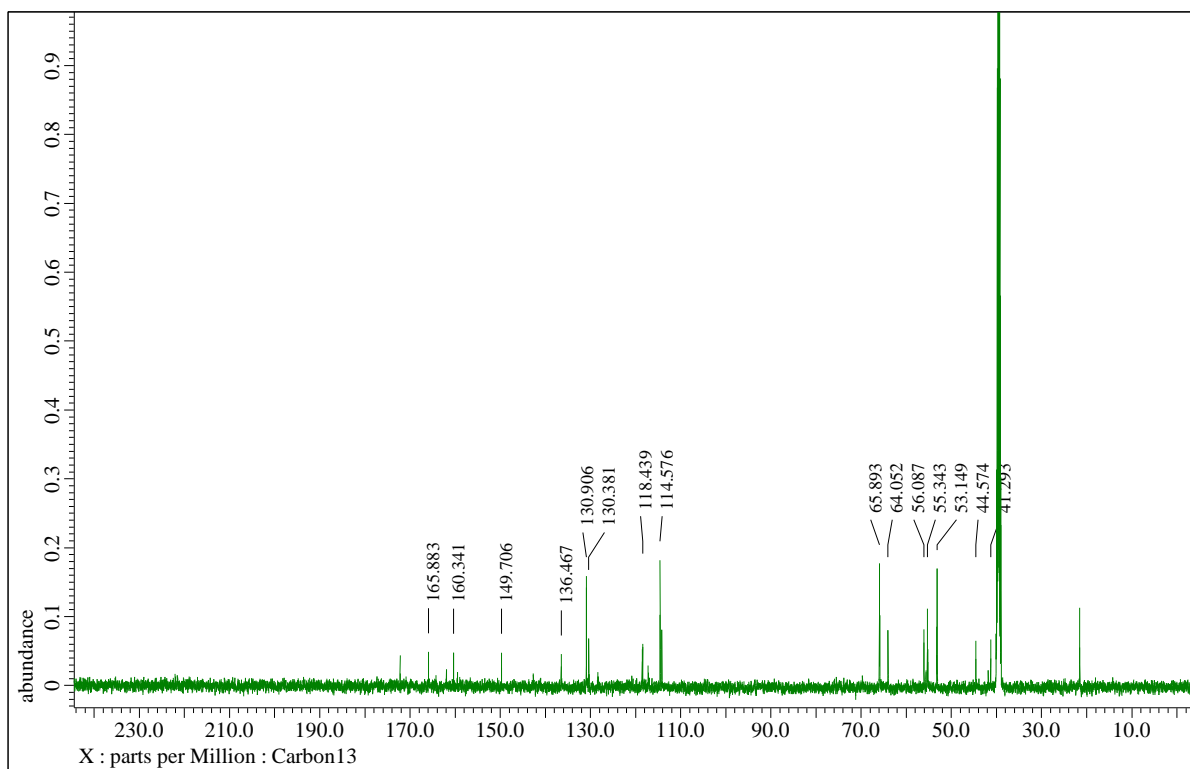

**2-(4-(4-methoxyphenyl)-3-(2-morpholinoethyl)-2-thioxo-2,3-dihydro-1H-imidazol-1-yl)acrylic acid 9{3,6}**

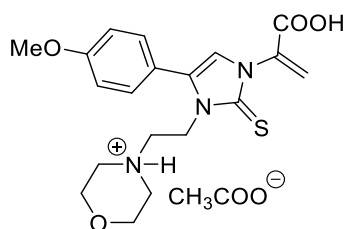

NMR purity 99%, yield quantitative (calculated from **8{3,6}**).  $^1\text{H}$  NMR (500 MHz,  $\text{DMSO-}d_6$ ):  $\delta$  = 11.79 (br. s, 1H), 7.46 (br. d,  $J$  = 8.8 Hz, 2H), 7.18 (s, 1H), 7.05 (br. d,  $J$  = 8.8 Hz, 2H), 6.37 (d,  $J$  = 0.7 Hz, 1H), 5.99 (d,  $J$  = 0.7 Hz, 1H), 4.12 (t,  $J$  = 6.9 Hz, 2H), 3.81 (s, 3H), 3.80 (dd,  $J$  = 3.4, 1.3 Hz, 2H), 3.43 (t,  $J$  = 4.5 Hz, 4H), 2.47 (t,  $J$  = 6.9 Hz, 2H), 2.21 (t,  $J$  = 4.5 Hz, 2H).  $^{13}\text{C}$  NMR (126 MHz,  $\text{DMSO-}d_6$ ):  $\delta$  = 163.31, 162.79, 159.70, 130.47, 130.08, 124.05, 120.36, 116.33, 114.24, 65.95, 55.35, 55.26, 55.22, 53.19, 41.97. HRMS (ESI-TOF, pos.):  $m/z$  calcd for  $\text{C}_{19}\text{H}_{25}\text{N}_3\text{O}_4\text{S}$   $[\text{M}+\text{H}]^+$  390.1482, found 390.1481.

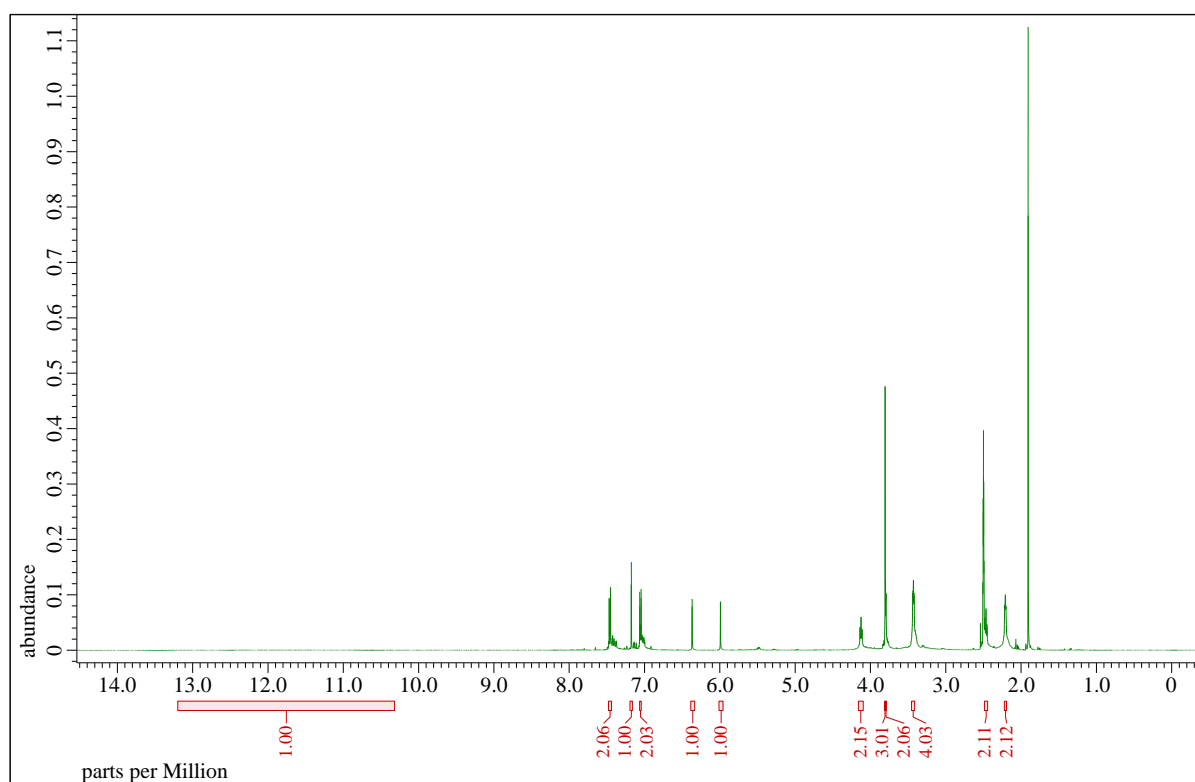

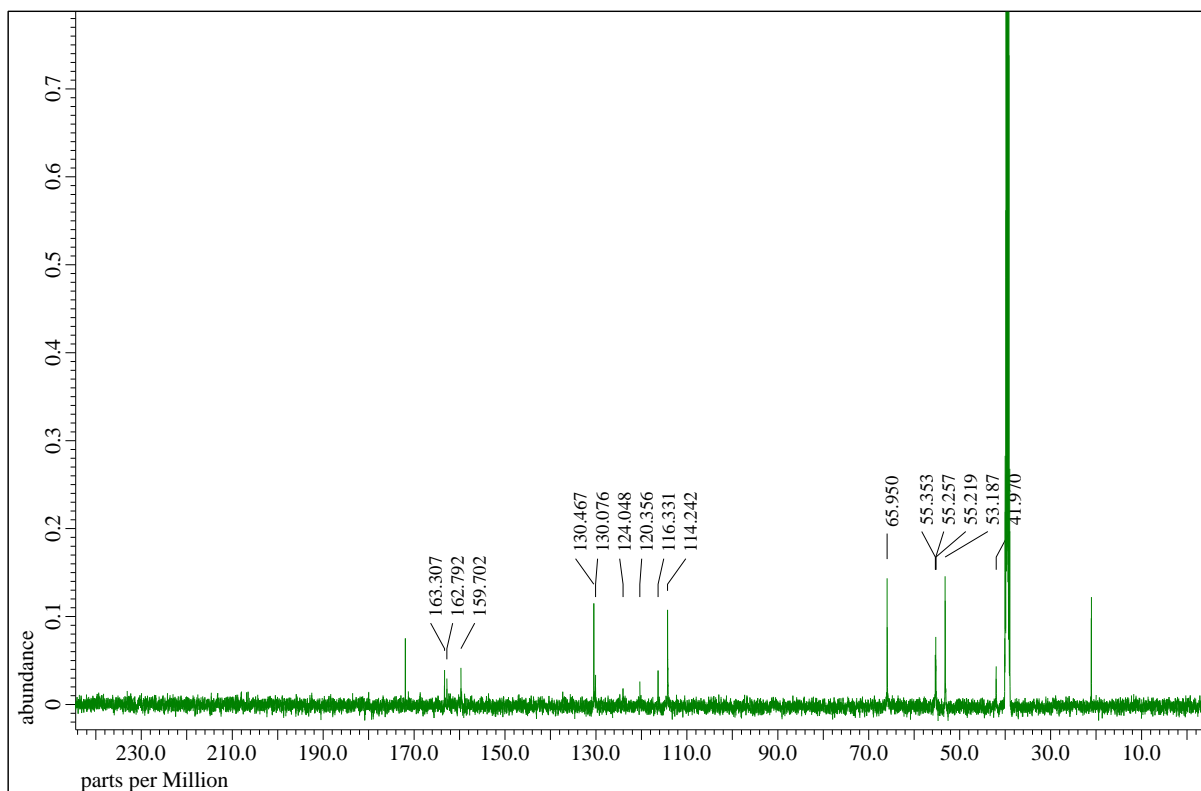

**(3R)-7-ethyl-6-(4-fluorophenyl)-2,3-dihydroimidazo[2,1-b]thiazol-7-ium-3-carboxylate 8{4,4}**

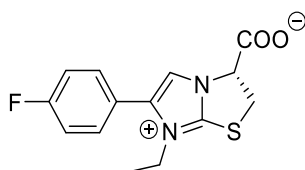

Creme amorphous solid, 16.9 mg (57%, 0.058 mmol). Cleaved from 180.0 mg of resin **2{4,4}** (0.565 mmol/g, 0.102 mmol of substrate). HPLC purity 99%. <sup>1</sup>H NMR (500 MHz, DMSO-*d*<sub>6</sub>): δ = 7.85 (s, 1H), 7.61 (br. dd, *J* = 8.8, 5.4 Hz, 2H), 7.41 (br. dd, *J* = 8.8, 8.8 Hz, 2H), 4.93 (dd, *J* = 8.4, 6.6 Hz, 1H), 4.35 (dd, *J* = 11.1, 8.4 Hz, 1H), 4.31 (dd, *J* = 11.1, 6.6 Hz, 1H), 4.00 (q, *J* = 7.3 Hz, 2H), 1.19 (t, *J* = 7.3 Hz, 3H). <sup>13</sup>C NMR (126 MHz, DMSO-*d*<sub>6</sub>): δ = 165.35, 162.85 (d, *J* = 247.1 Hz), 148.88, 135.06, 131.66 (d, *J* = 8.4 Hz), 122.80, 119.26, 116.26 (d, *J* = 21.6 Hz), 64.01, 42.38, 41.56, 13.81. HRMS (ESI-TOF, pos.): *m/z* calcd for C<sub>14</sub>H<sub>14</sub>FN<sub>2</sub>O<sub>2</sub>S [M+H]<sup>+</sup> 293.0755, found 293.0754.

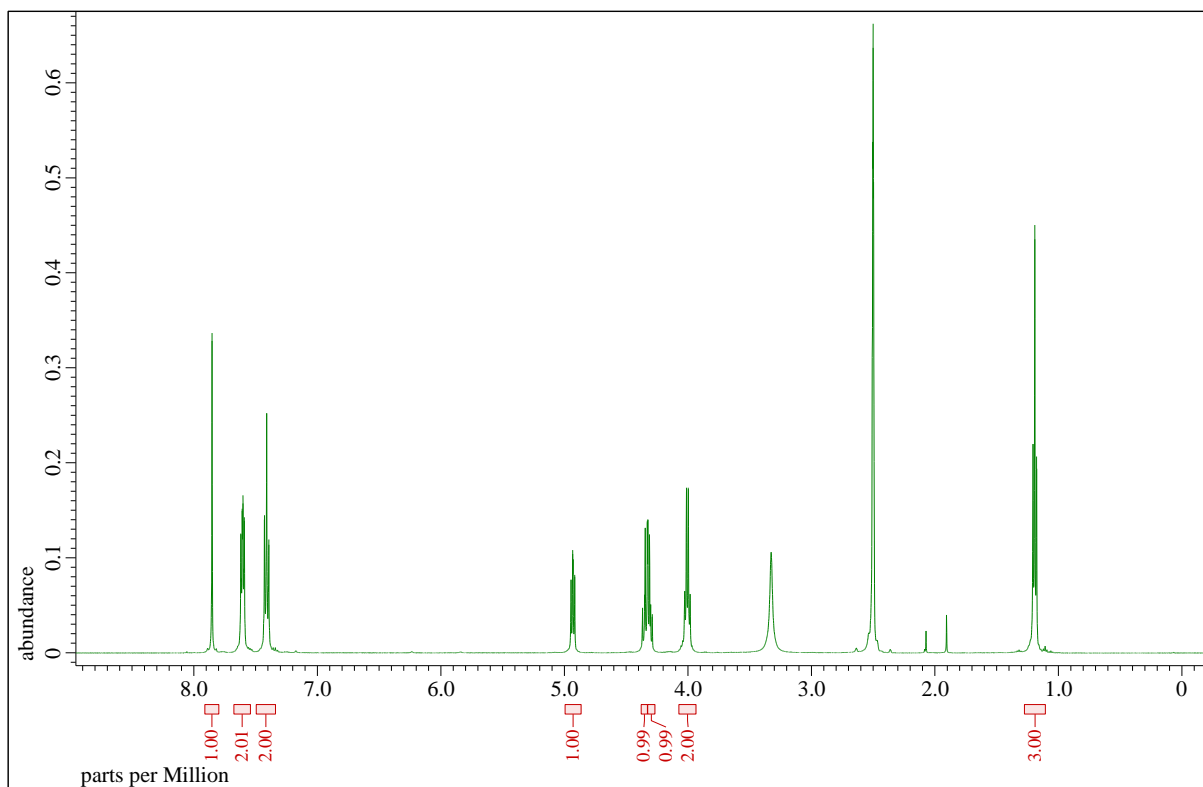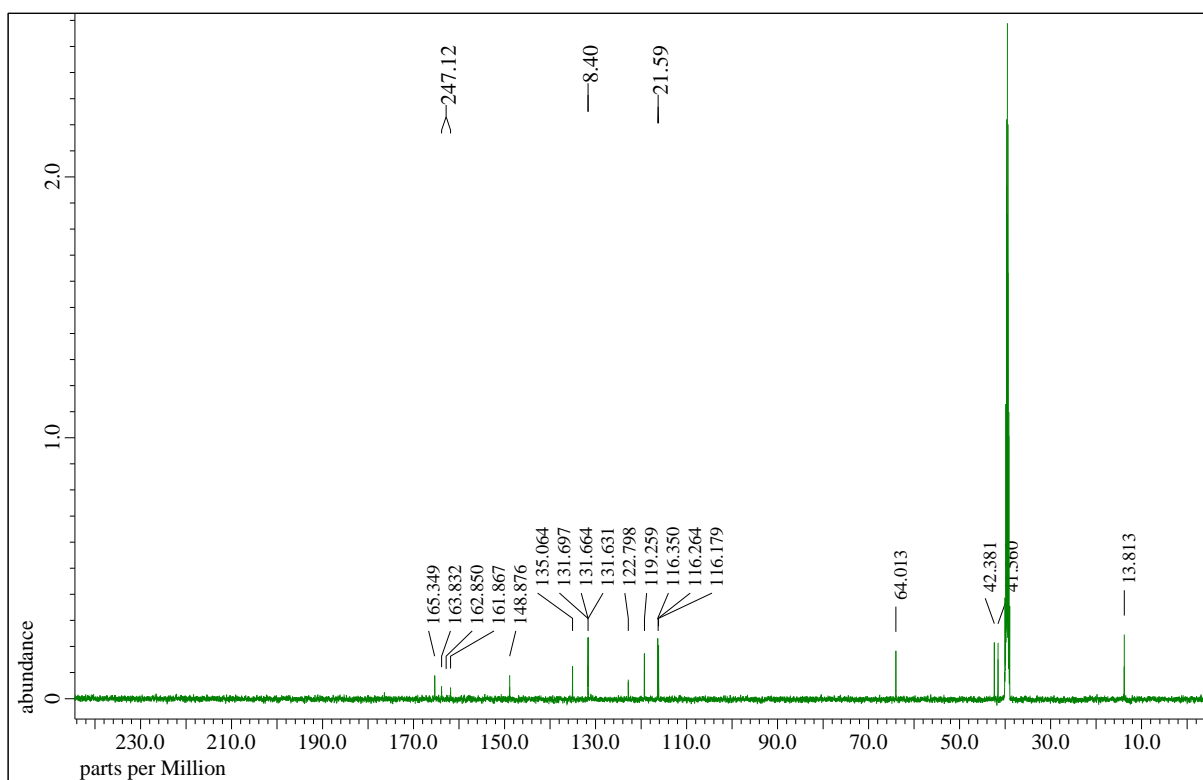

## 2-(3-ethyl-4-(4-fluorophenyl)-2-thioxo-2,3-dihydro-1H-imidazol-1-yl)acrylic acid 9{4,4}

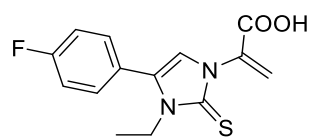

NMR: Mixture with 16% of **8**{4,4}.  $^1\text{H}$  NMR (500 MHz,  $\text{DMSO-}d_6$ ):  $\delta$  = 13.23 (br. s, 1H), 7.57 (br. dd,  $J$  = 8.8, 5.4 Hz, 2H), 7.36 (br. dd,  $J$  = 8.8, 8.8 Hz, 2H), 7.31 (s, 1H), 6.41 (d,  $J$  = 0.7 Hz, 1H), 6.05 (d,  $J$  = 0.7 Hz, 1H), 4.04 (q,  $J$  = 7.1 Hz, 2H), 1.10 (t,  $J$  = 7.1 Hz, 3H).  $^{13}\text{C}$  NMR (126 MHz,  $\text{DMSO-}d_6$ ):  $\delta$  = 163.13, 162.73, 162.38 (d,  $J$  = 247.1 Hz), 136.60, 131.17 (d,  $J$  = 8.4 Hz), 128.87, 124.89, 124.53 (d,  $J$  = 2.4 Hz), 117.02, 115.97 (d,  $J$  = 21.6 Hz), 38.99, 13.36. HRMS (ESI-TOF, pos.):  $m/z$  calcd for  $\text{C}_{14}\text{H}_{14}\text{FN}_2\text{O}_2\text{S}$   $[\text{M}+\text{H}]^+$  293.0755, found 293.0754.

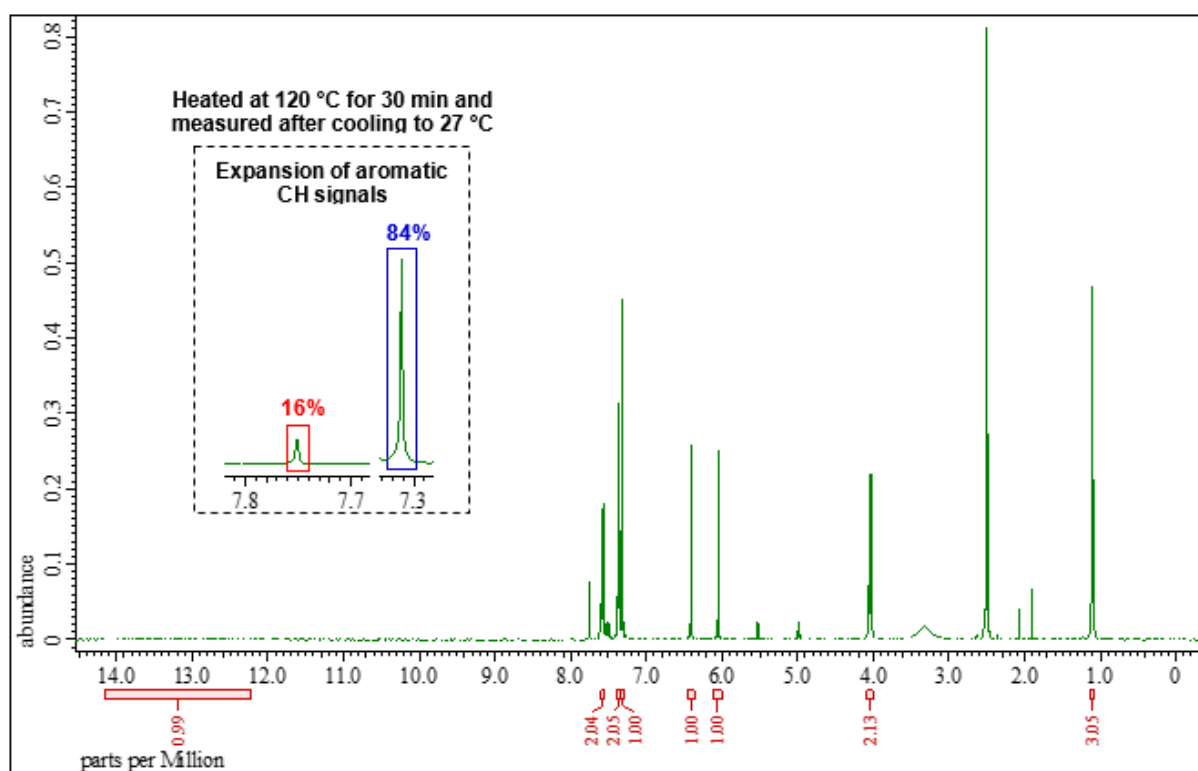

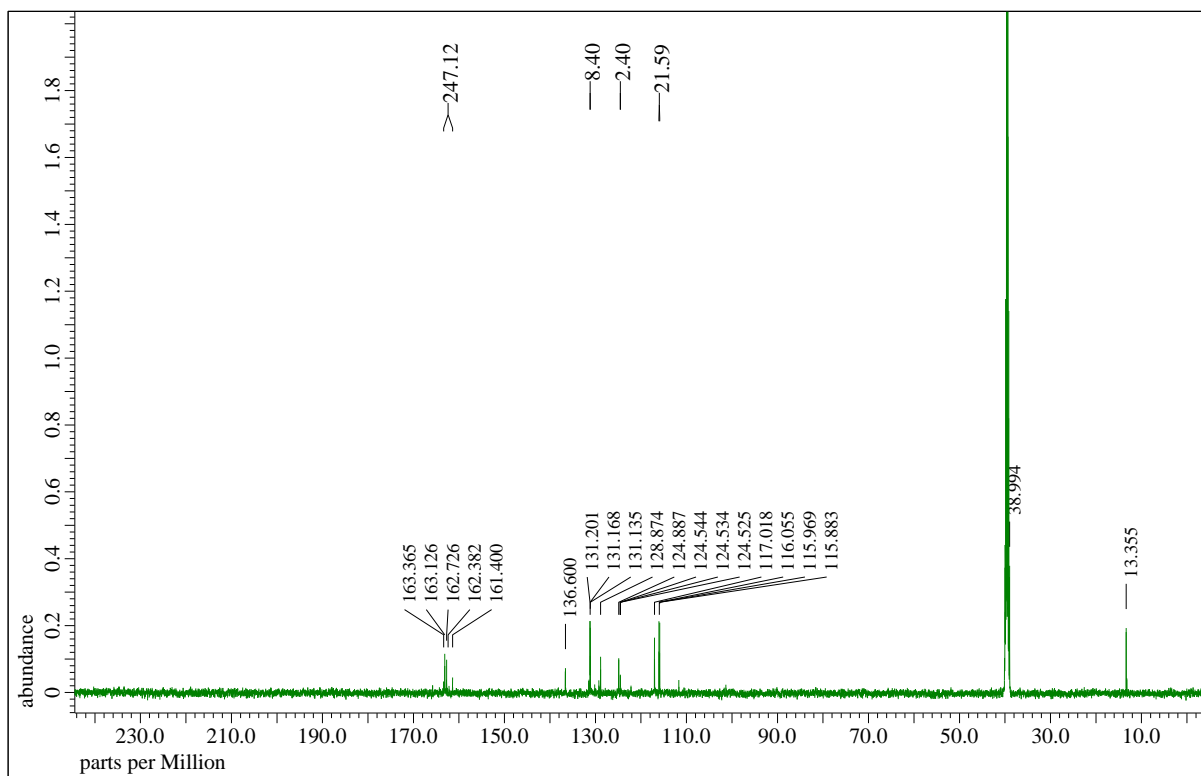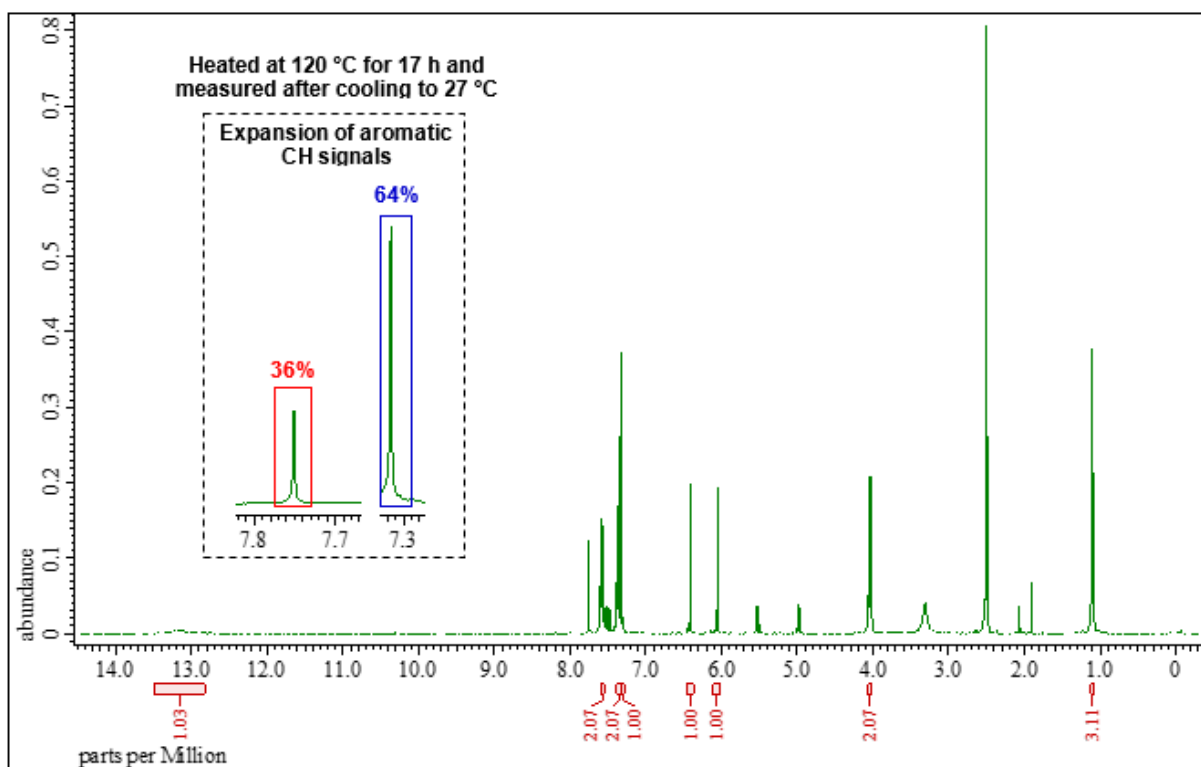

## 2-(3-(cyclohexylmethyl)-4-phenyl-2-thioxo-2,3-dihydro-1H-imidazol-1-yl)acrylic acid 9{4,5}

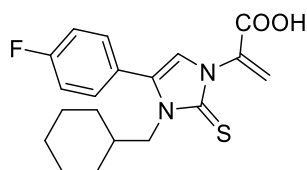

NMR: Mixture with 8% of **8**{4,5}. Yellow amorphous solid, 19.0 mg (19%, 0.053 mmol). Cleaved from 494.7 mg of resin **2**{4,5} (0.565 mmol/g, 0.280 mmol of substrate). HPLC purity 99%.  $^1\text{H}$  NMR (500 MHz,  $\text{DMSO-}d_6$ ):  $\delta$  = 12.60 (br. s, 1H), 7.56 (br. dd,  $J$  = 8.8, 5.4 Hz, 2H), 7.34 (br. dd,  $J$  = 8.8, 8.8 Hz, 2H), 7.29 (s, 1H), 6.40 (d,  $J$  = 0.7 Hz, 1H), 6.03 (d,  $J$  = 0.7 Hz, 1H), 3.99 (d,  $J$  = 7.3 Hz, 2H), 1.66-1.55 (m, 1H), 1.53-1.47 (m, 2H), 1.38-1.32 (m, 2H), 1.06-0.88 (m, 4H), 0.75-0.64 (m, 2H).  $^{13}\text{C}$  NMR (126 MHz,  $\text{DMSO-}d_6$ ):  $\delta$  = 163.63, 162.25 (d,  $J$  = 247.1 Hz), 163.13, 136.73, 131.20 (d,  $J$  = 8.4 Hz), 129.36, 124.94 (d,  $J$  = 2.4 Hz), 124.80, 116.97, 115.88 (d,  $J$  = 21.6 Hz), 50.08, 35.93, 29.74, 25.63, 25.01. HRMS (ESI-TOF, pos.):  $m/z$  calcd for  $\text{C}_{19}\text{H}_{22}\text{FN}_2\text{O}_2\text{S}$   $[\text{M}+\text{H}]^+$  361.1381, found 361.1382.

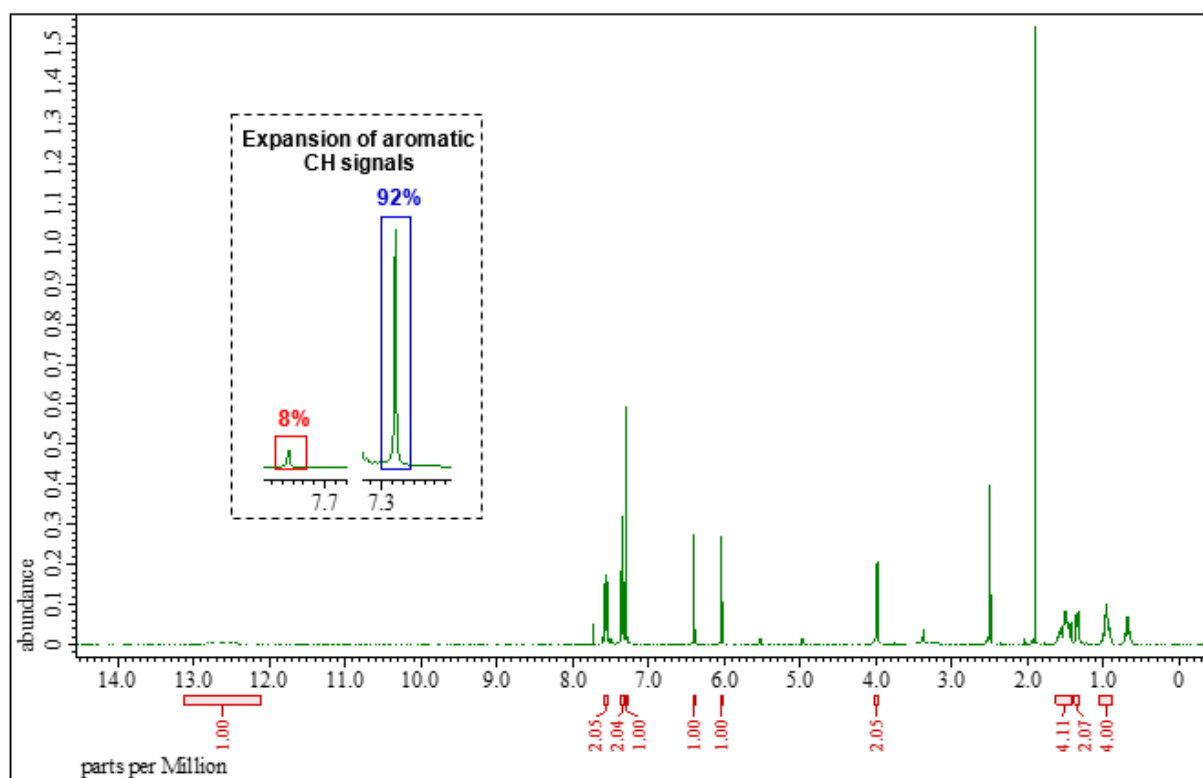



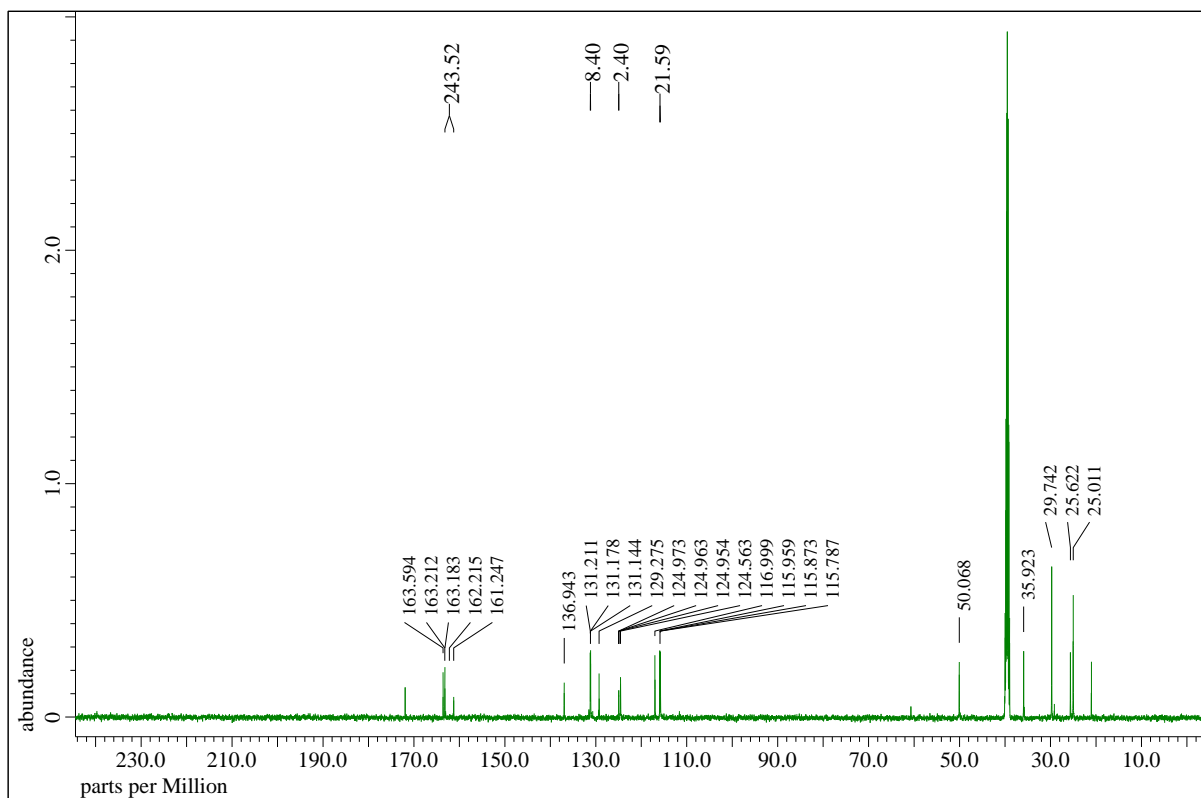

**(3R)-7-benzyl-6-(4-bromophenyl)-2,3-dihydroimidazo[2,1-b]thiazol-7-ium-3-carboxylate 8{5,2}**

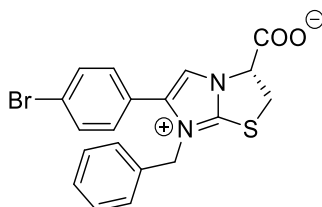

NMR: Mixture with 2% of **9{5,2}**. Creme amorphous solid, 26.0 mg (28%, 0.063 mmol). Cleaved from 405.1 mg of resin **2{5,2}** (0.556 mmol/g, 0.225 mmol of substrate). HPLC purity 98%.  $^1\text{H}$  NMR (500 MHz,  $\text{DMSO-}d_6$ ):  $\delta$  = 7.99 (s, 1H), 7.70 (br. d,  $J$  = 8.6 Hz, 2H), 7.44 (br. d,  $J$  = 8.6 Hz, 2H), 7.34-7.35 (m, 3H), 7.12-7.14 (m, 2H), 5.29 (s, 2H), 5.02 (dd,  $J$  = 8.6, 6.0 Hz, 1H), 4.30 (dd,  $J$  = 11.1, 8.6 Hz, 1H), 4.23 (dd,  $J$  = 11.1, 6.0 Hz, 1H).  $^{13}\text{C}$  NMR (126 MHz,  $\text{DMSO-}d_6$ ):  $\delta$  = 165.77, 150.50, 135.45, 133.01, 132.08, 131.15, 128.89, 128.66, 127.81, 125.41, 123.48, 119.64, 63.78, 50.28, 41.52. HRMS (ESI-TOF, pos.):  $m/z$  calcd for  $\text{C}_{19}\text{H}_{16}\text{BrN}_2\text{O}_2\text{S}$   $[\text{M}+\text{H}]^+$  415.0110, found 415.0117.

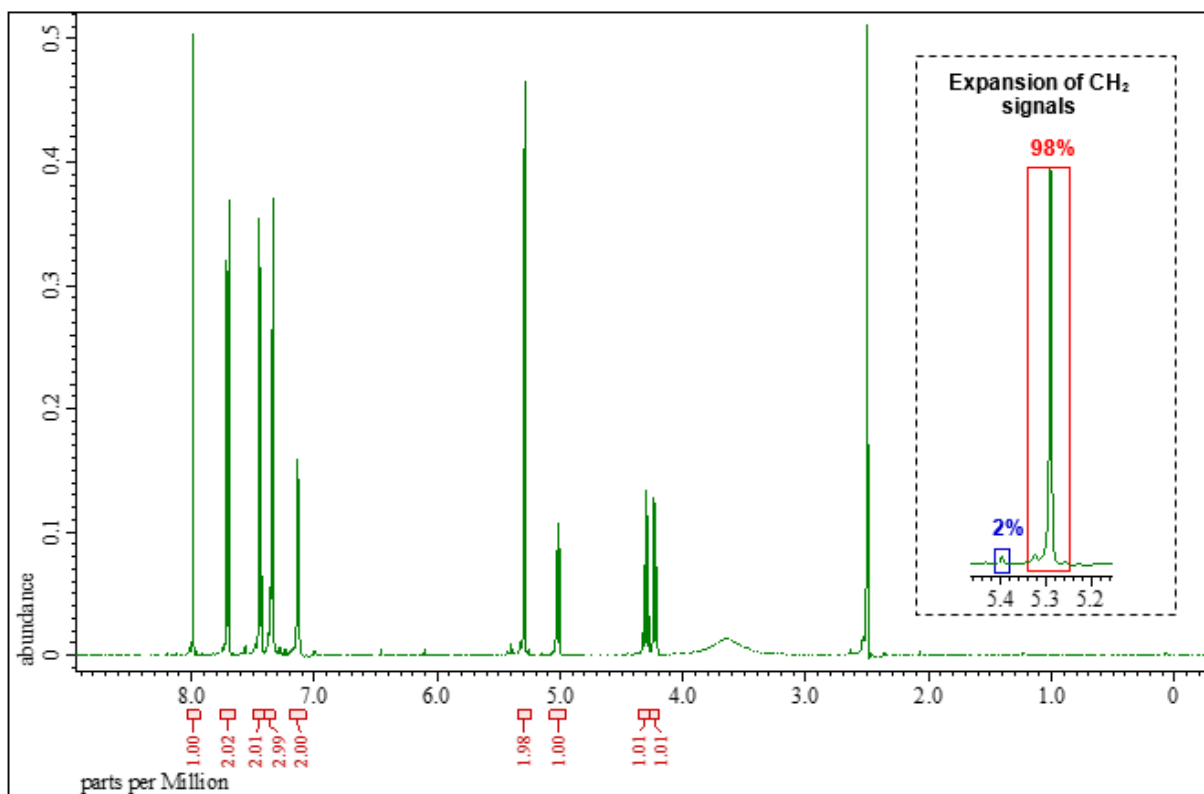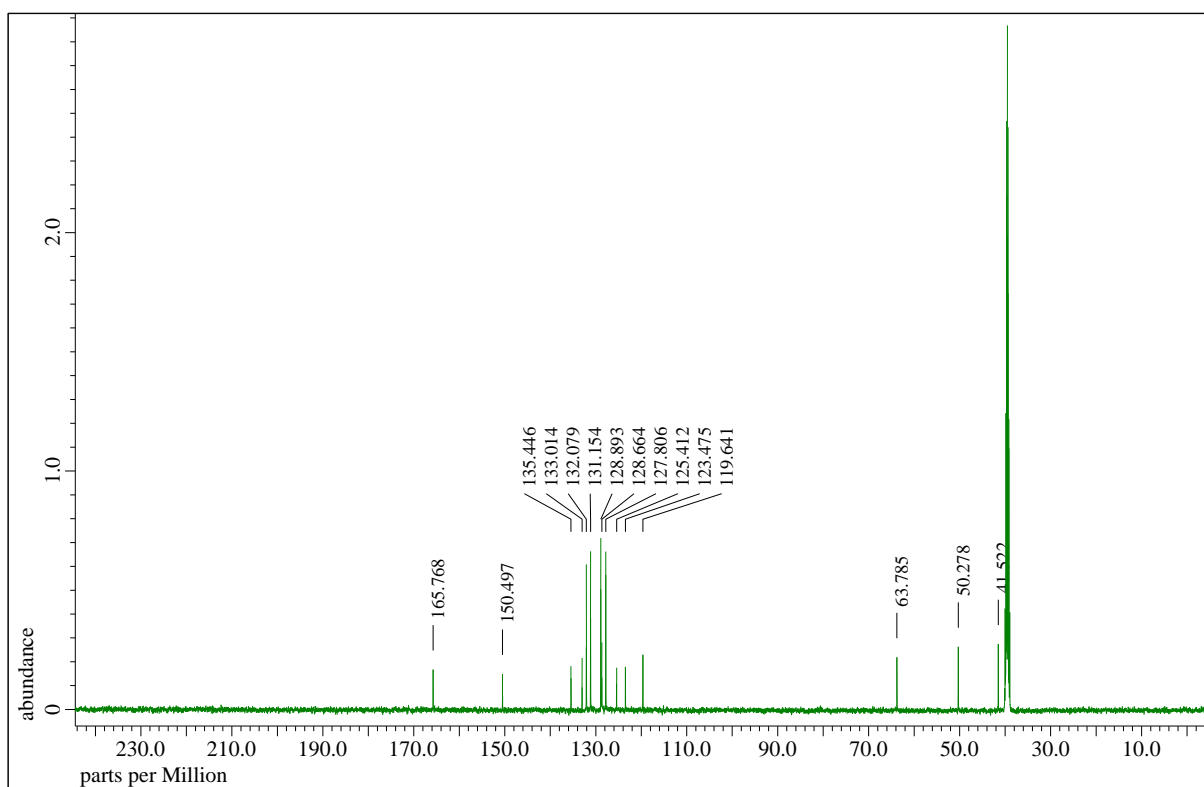

**2-(3-benzyl-4-(4-bromophenyl)-2-thioxo-2,3-dihydro-1H-imidazol-1-yl)acrylic acid 9{5,2}**

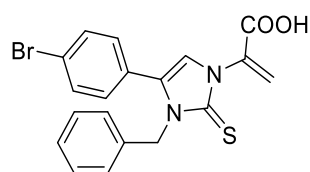

NMR: Mixture with 9% of **8**{5,2}.  $^1\text{H}$  NMR (500 MHz,  $\text{DMSO-}d_6$ ):  $\delta$  = 13.37 (br. s, 1H), 7.57 (br. d,  $J$  = 8.6 Hz, 2H), 7.47 (s, 1H), 7.18-7.30 (m, 5H), 7.00 (br. d,  $J$  = 8.6 Hz, 2H), 6.47 (d,  $J$  = 0.7 Hz, 1H), 6.14 (d,  $J$  = 0.7 Hz, 1H), 5.39 (s, 2H).  $^{13}\text{C}$  NMR (126 MHz,  $\text{DMSO-}d_6$ ):  $\delta$  = 164.69, 163.03, 136.58, 136.32, 131.71, 130.61, 130.36, 129.21, 128.38, 127.20, 126.43, 125.42, 122.25, 117.65, 47.97. HRMS (ESI-TOF, pos.):  $m/z$  calcd for  $\text{C}_{19}\text{H}_{16}\text{BrN}_2\text{O}_2\text{S}$   $[\text{M}+\text{H}]^+$  415.0110, found 415.0117.

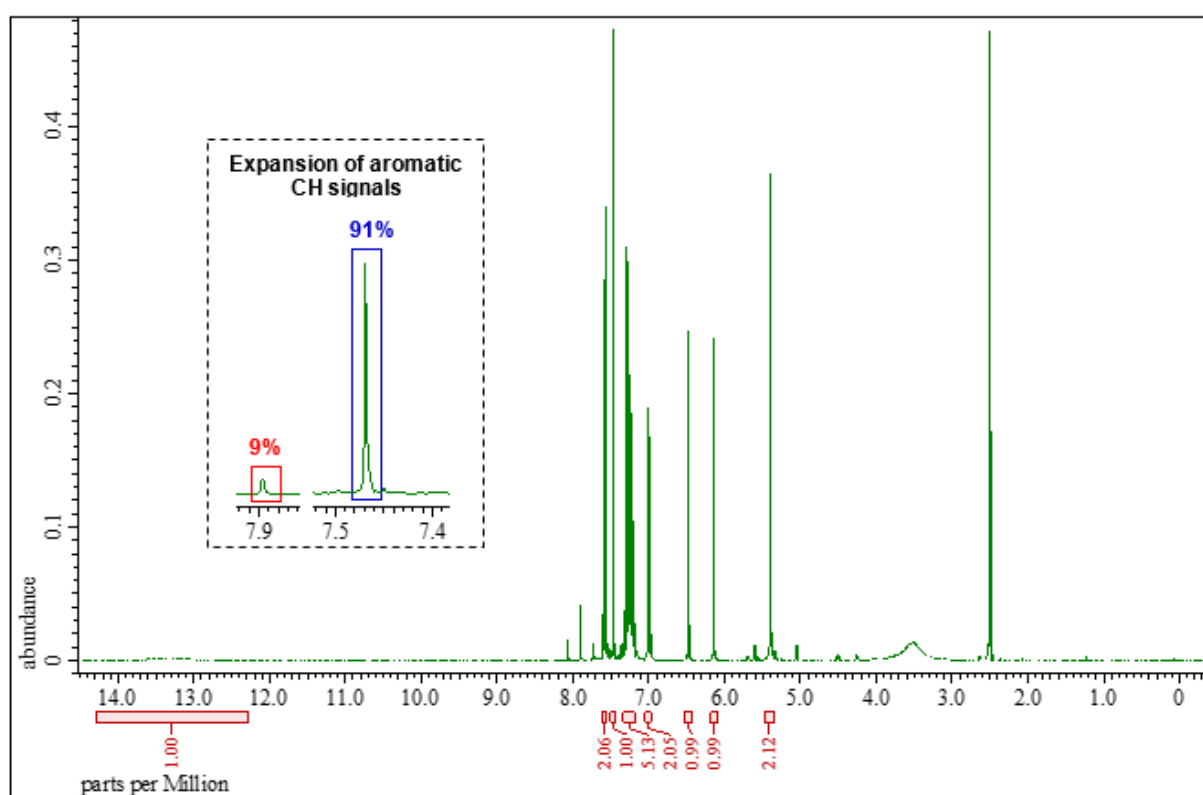

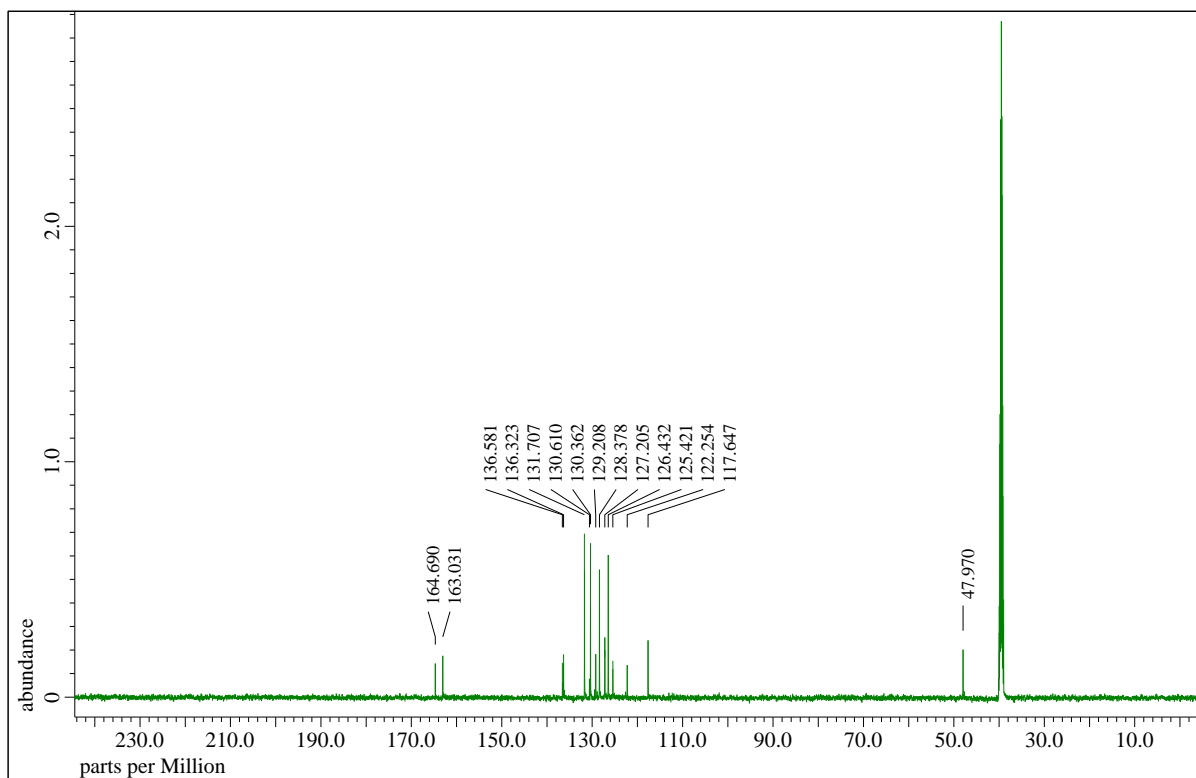

**(3R)-7-allyl-6-(4-bromophenyl)-2,3-dihydroimidazo[2,1-b]thiazol-7-ium-3-carboxylate 8{5,3}**

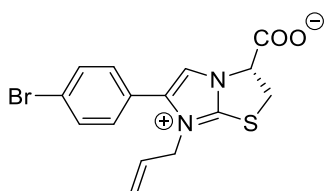

Creme amorphous solid, 17.5 mg (18%, 0.048 mmol). Cleaved from 483.9 mg of resin **2{5,3}** (0.556 mmol/g, 0.269 mmol of substrate). HPLC purity 99%.  $^1\text{H}$  NMR (500 MHz,  $\text{DMSO-}d_6$ ):  $\delta$  = 7.96 (s, 1H), 7.75 (br. d,  $J$  = 8.6 Hz, 2H), 7.46 (br. d,  $J$  = 8.6 Hz, 2H), 5.86-5.94 (m, 1H), 5.32 (br. d,  $J$  = 10.4 Hz, 1H), 5.14 (br. d,  $J$  = 17.2 Hz, 1H), 4.95 (dd,  $J$  = 8.4, 6.2 Hz, 1H), 4.65 (ddd,  $J$  = 4.7, 1.4, 1.4 Hz, 2H), 4.33 (dd,  $J$  = 11.0, 8.4 Hz, 1H), 4.28 (dd,  $J$  = 11.0, 6.2 Hz, 1H).  $^{13}\text{C}$  NMR (126 MHz,  $\text{DMSO-}d_6$ ):  $\delta$  = 165.35, 150.22, 135.32, 132.14, 130.90, 130.21, 125.42, 123.40, 119.65, 119.36, 64.08, 49.09, 41.68. HRMS (ESI-TOF, pos.):  $m/z$  calcd for  $\text{C}_{15}\text{H}_{14}\text{BrN}_2\text{O}_2\text{S}$   $[\text{M}+\text{H}]^+$  364.9954, found 364.9933.

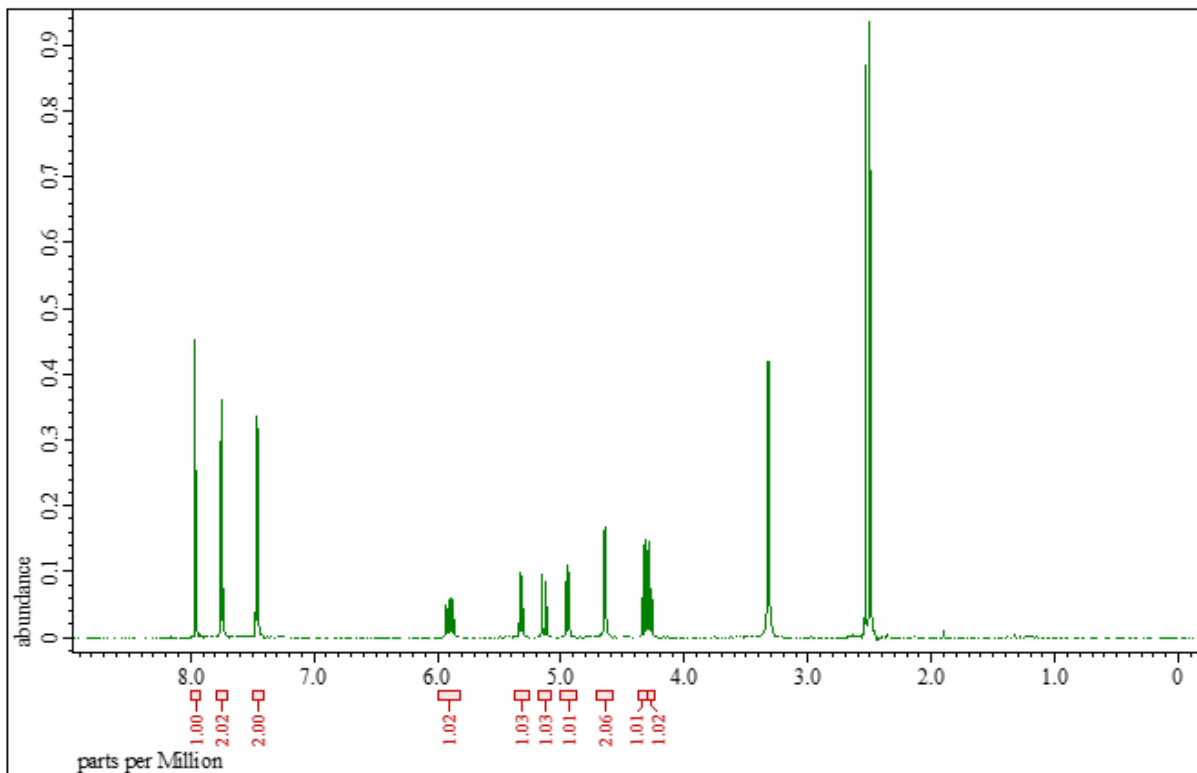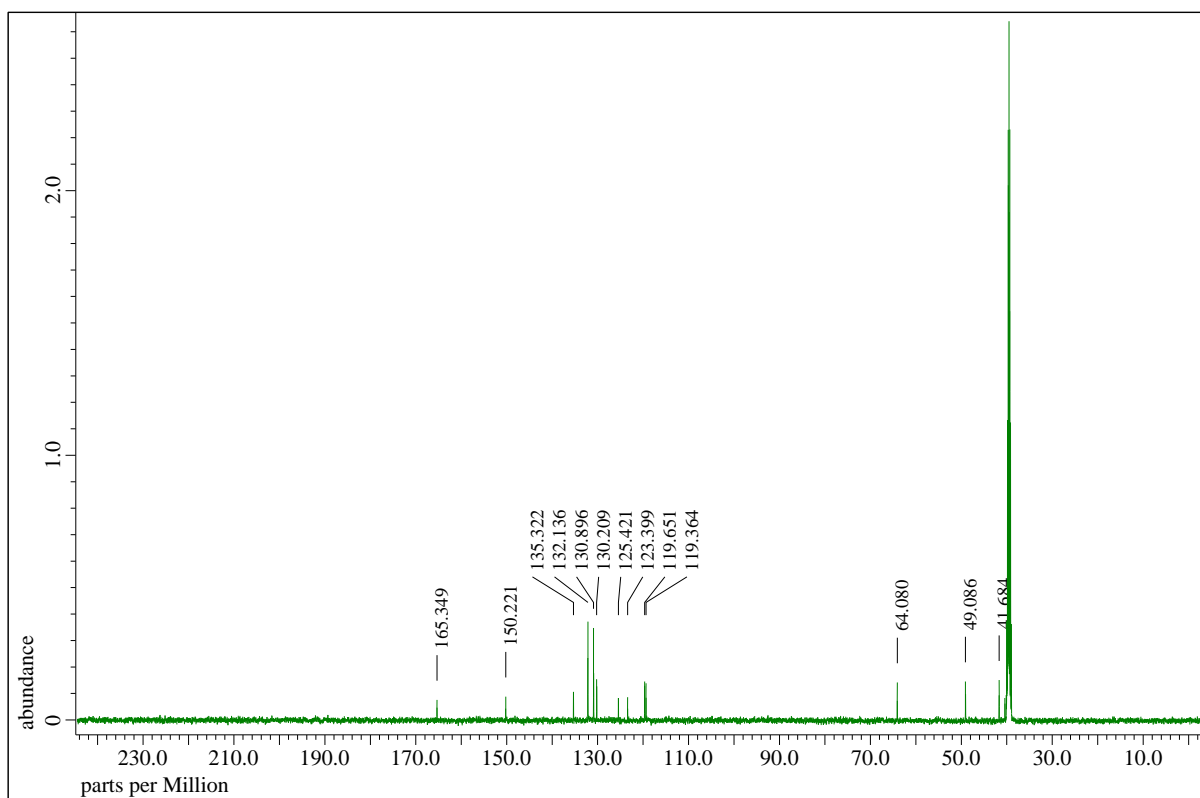

**2-(3-allyl-4-(4-bromophenyl)-2-thioxo-2,3-dihydro-1H-imidazol-1-yl)acrylic acid **9{5,3}****

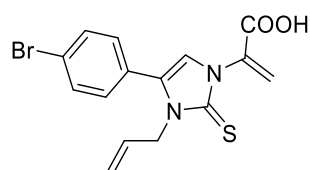

NMR: Mixture with 29% of **8{5,3}**.  $^1\text{H}$  NMR (500 MHz,  $\text{DMSO-}d_6$ ):  $\delta$  = 13.27 (br. s, 1H), 7.68 (br. d,  $J$  = 8.6 Hz, 2H), 7.45 (br. d,  $J$  = 8.6 Hz, 2H), 7.44 (s, 1H), 6.44 (d,  $J$  = 0.7 Hz, 1H), 6.08 (d,  $J$  = 0.7 Hz, 1H), 5.77-5.84 (m, 1H), 5.11 (br. d,  $J$  = 10.5 Hz, 1H), 4.84 (br. d,  $J$  = 17.3 Hz, 1H), 4.72 (ddd,  $J$  = 4.7, 1.4, 1.4 Hz, 2H).  $^{13}\text{C}$  NMR (126 MHz,  $\text{DMSO-}d_6$ ):  $\delta$  = 163.99, 163.04, 132.22, 131.81, 130.59, 130.36, 129.17, 127.25, 125.23, 122.24, 117.32, 116.96, 47.09. HRMS (ESI-TOF, pos.):  $m/z$  calcd for  $\text{C}_{15}\text{H}_{14}\text{BrN}_2\text{O}_2\text{S}$   $[\text{M}+\text{H}]^+$  364.9954, found 364.9933.

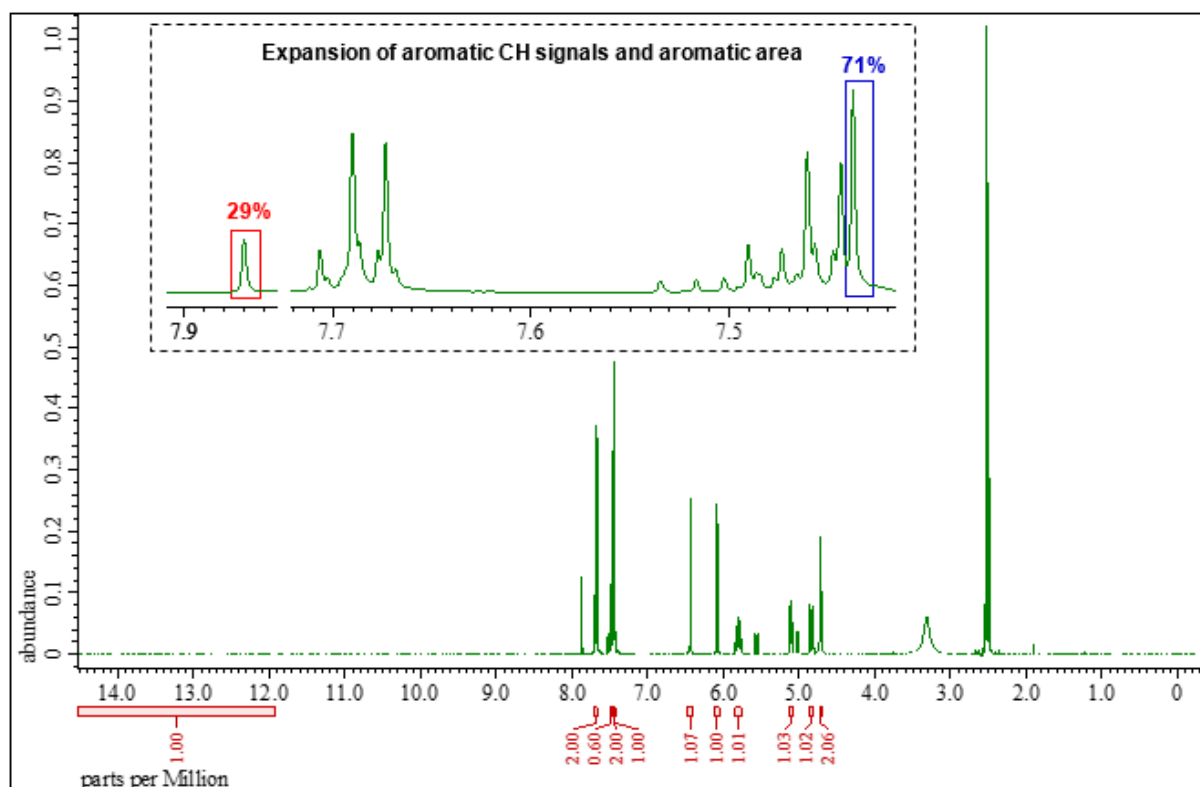

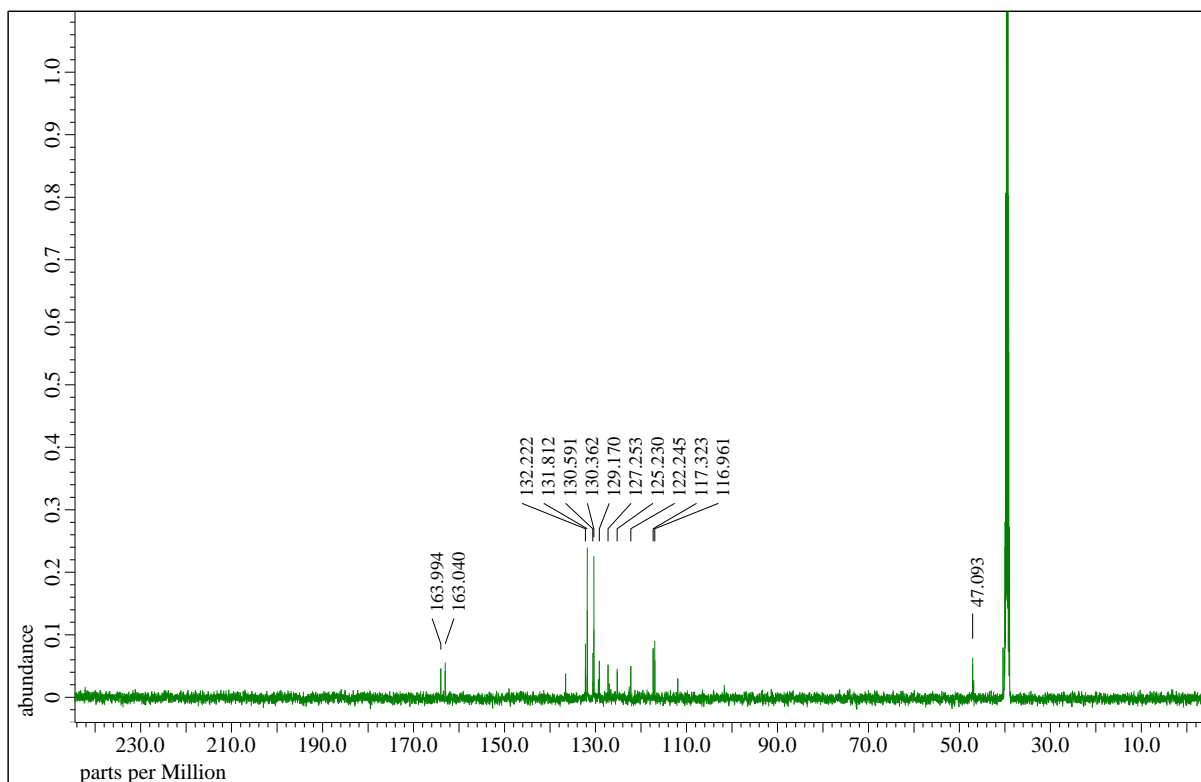

**(3R)-6-(4-bromophenyl)-7-(2-morpholinoethyl)-2,3-dihydroimidazo[2,1-b]thiazol-7-ium-3-carboxylate 8{5,6}**

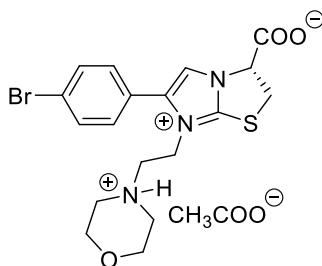

NMR: Mixture of 12% with **9**{5,6}. Creme amorphous solid, 10.5 mg (17.3%, 0.024 mmol) of which **8** 10.3 mg (17%, 0.024 mmol) and **9** 0.2 mg (0.3%, 0.0006 mmol). Cleaved from 244.2 mg of resin **2**{5,6} (0.556 mmol/g, 0.136 mmol of substrate). HPLC purity 99%. <sup>1</sup>H NMR (500 MHz, DMSO-*d*<sub>6</sub>):  $\delta$  = 7.89 (1H), 7.76 (d, *J* = 8.6 Hz, 2H), 7.52 (d, *J* = 8.6 Hz, 2H), 4.95 (dd, *J* = 8.2, 6.6 Hz, 1H), 4.29 (dd, *J* = 11.1, 8.2 Hz, 1H), 4.25 (dd, *J* = 11.1, 6.6 Hz, 1H), 4.08 (t, *J* = 5.5 Hz, 2H), 3.46 (t, *J* = 4.5 Hz, 4H), 2.44-2.48 (m, 2H), 2.21-2.29 (m, 4H). <sup>13</sup>C NMR (126 MHz, DMSO-*d*<sub>6</sub>):  $\delta$  = 165.42, 150.55, 135.41, 132.15, 131.21, 125.81, 123.37, 119.25, 65.93, 65.85, 56.16, 53.26, 53.16, 41.41. HRMS (ESI-TOF, pos.): *m/z* calcd for C<sub>18</sub>H<sub>21</sub>BrN<sub>3</sub>O<sub>3</sub>S [M+H]<sup>+</sup> 438.0482, found 438.0482.

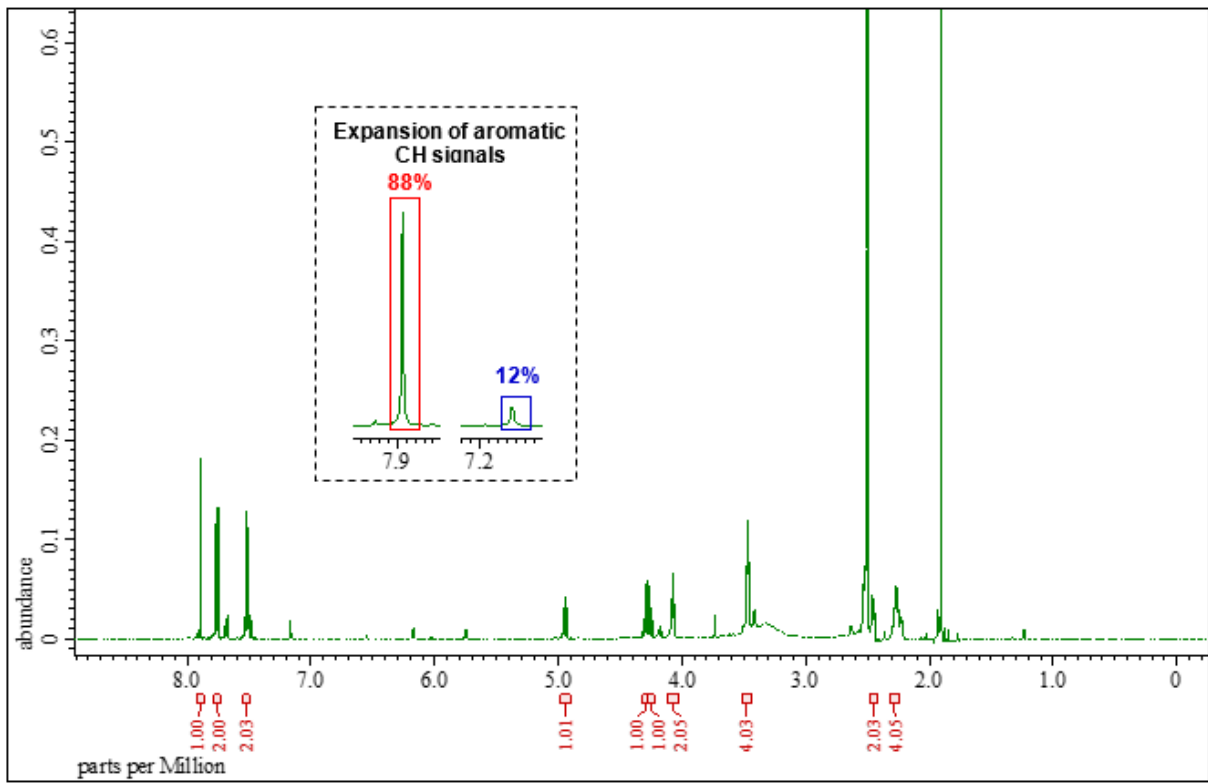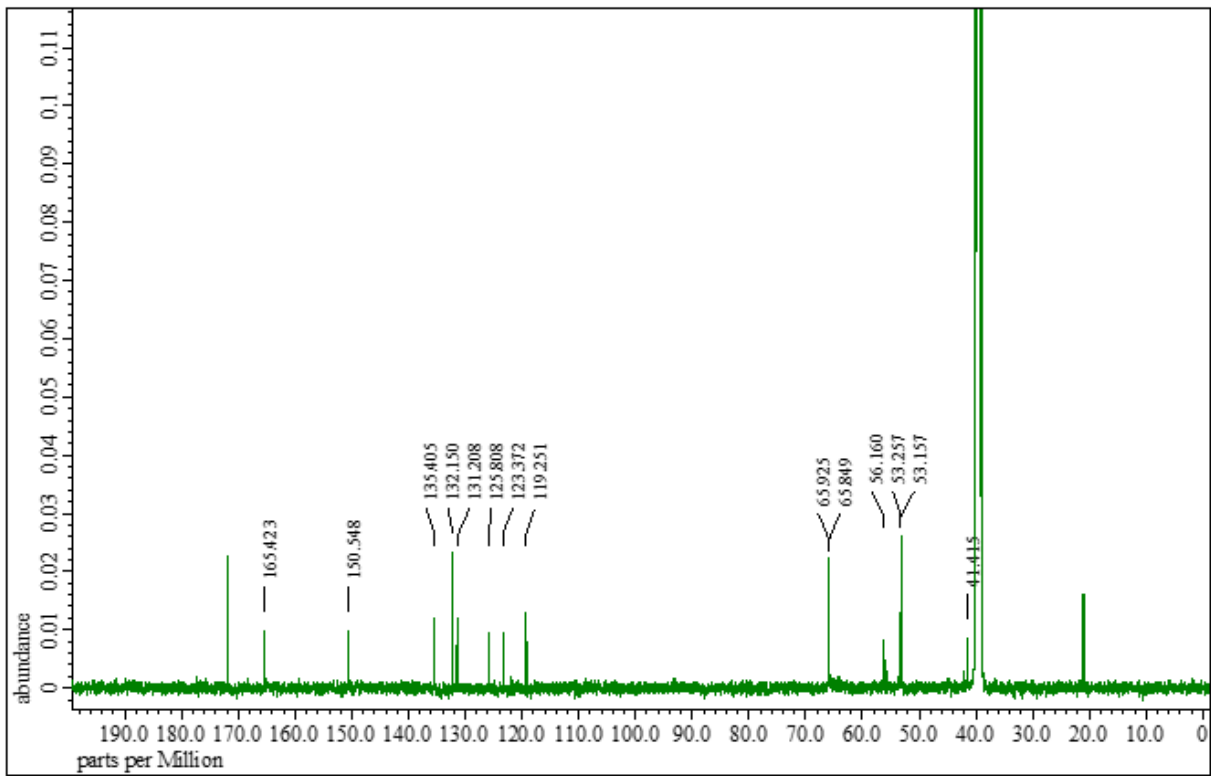



**2-(4-(4-bromophenyl)-3-(2-morpholinoethyl)-2-thioxo-2,3-dihydro-1H-imidazol-1-yl)acrylic acid 9{5,6}**

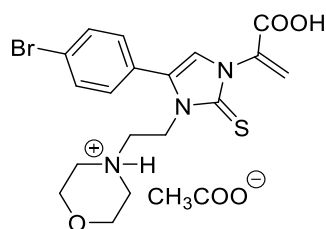

NMR purity 99%, yield quantitative (calculated from **8{5,6}**).  $^1\text{H}$  NMR (500 MHz,  $\text{DMSO-}d_6$ ):  $\delta$  = 12.07 (br. s, 1H), 7.71 (br. d,  $J$  = 8.6 Hz, 2H), 7.52 (br. d,  $J$  = 8.6 Hz, 2H), 7.35 (s, 1H), 6.40 (d,  $J$  = 0.7 Hz, 1H), 6.03 (d,  $J$  = 0.7 Hz, 1H), 4.17 (t,  $J$  = 6.8 Hz, 2H), 3.40 (t,  $J$  = 4.5 Hz, 4H), 3.37 (t,  $J$  = 4.5 Hz, 2H), 2.47 (t,  $J$  = 6.8 Hz, 2H), 2.21 (t,  $J$  = 4.5 Hz, 2H).  $^{13}\text{C}$  NMR (126 MHz,  $\text{DMSO-}d_6$ ):  $\delta$  = 163.51, 163.09, 131.82, 131.03, 130.76, 129.31, 127.59, 122.21, 117.17, 111.69, 65.92, 55.39, 53.21, 42.24. HRMS (ESI-TOF, pos.):  $m/z$  calcd for  $\text{C}_{18}\text{H}_{21}\text{BrN}_3\text{O}_3\text{S}$   $[\text{M}+\text{H}]^+$  438.0482, found 438.0482.

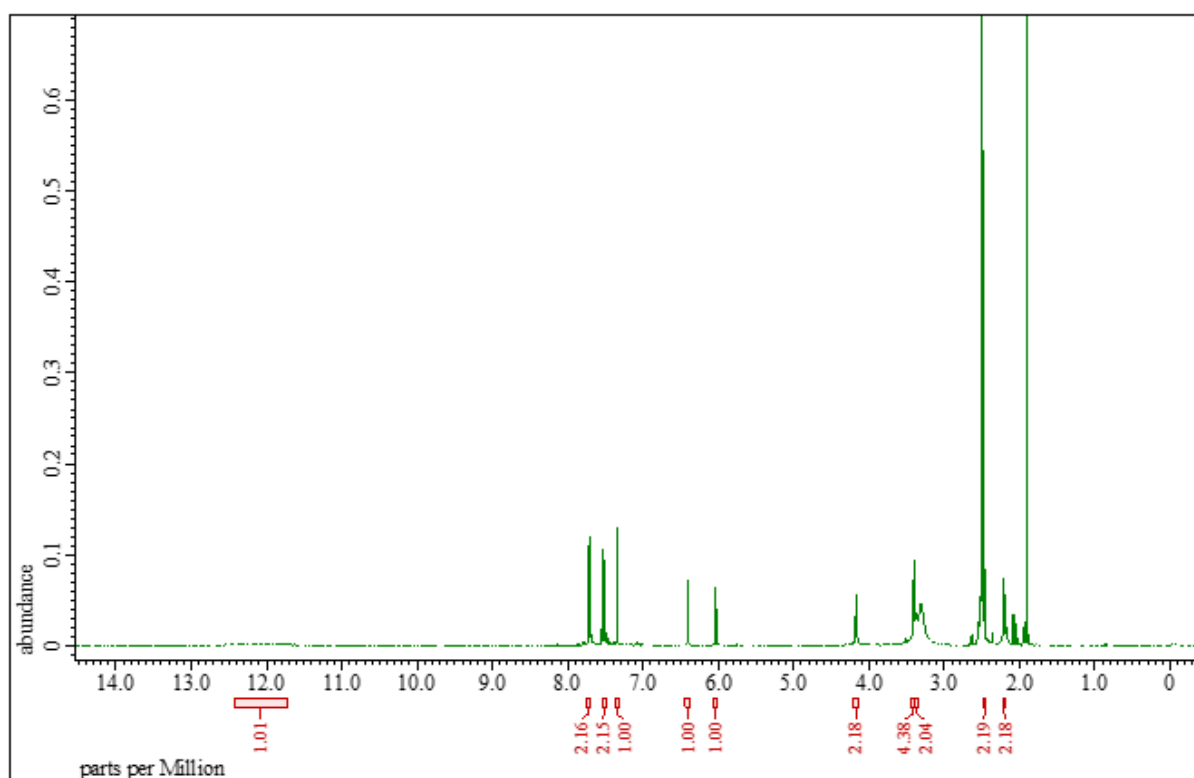

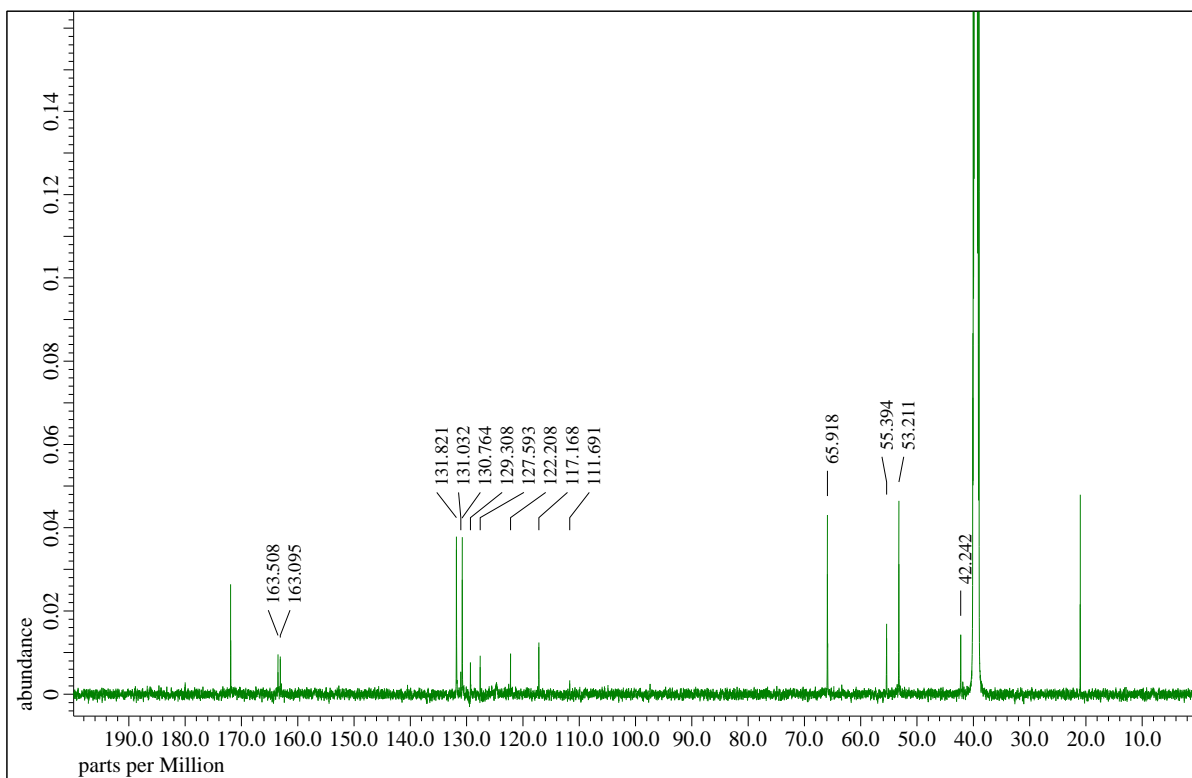

**(3R)-7-benzyl-6-(thiophen-3-yl)-2,3-dihydroimidazo[2,1-b]thiazol-7-ium-3-carboxylate  
8{7,2}**

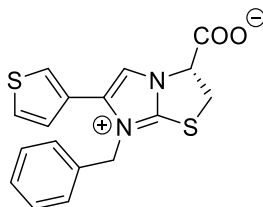

NMR: Mixture with 3% of **9{7,2}**. Creme amorphous solid, 22.9 mg (26%, 0.067 mmol). Cleaved from 465.3 mg of resin **2{7,2}** (0.556 mmol/g, 0.259 mmol of substrate). HPLC purity 98%. <sup>1</sup>H NMR (500 MHz, DMSO-*d*<sub>6</sub>):  $\delta$  = 8.09 (s, 1H), 7.90 (dd, *J* = 2.9, 1.4 Hz, 1H), 7.76 (dd, *J* = 5.0, 2.9 Hz, 1H), 7.37-7.38 (m, 3H), 7.31 (dd, *J* = 5.0, 1.4 Hz, 1H), 7.19 (dd, *J* = 7.6, 1.8 Hz, 2H), 5.68 (dd, *J* = 9.0, 3.9 Hz, 1H), 5.43 (d, *J* = 15.9 Hz, 1H), 5.38 (d, *J* = 15.9 Hz, 1H), 4.52 (dd, *J* = 11.7, 9.0 Hz, 1H), 4.25 (dd, *J* = 11.7, 3.9 Hz, 1H). <sup>13</sup>C NMR (126 MHz, DMSO-*d*<sub>6</sub>):  $\delta$  = 168.04, 151.49, 133.12, 132.71, 129.00, 128.88, 128.21, 128.03, 127.58, 127.41, 125.55, 118.77, 61.44, 50.81, 40.71. HRMS (ESI-TOF, pos.): *m/z* calcd for C<sub>17</sub>H<sub>15</sub>N<sub>2</sub>O<sub>2</sub>S<sub>2</sub> [M+H]<sup>+</sup> 343.0569, found 343.0571.

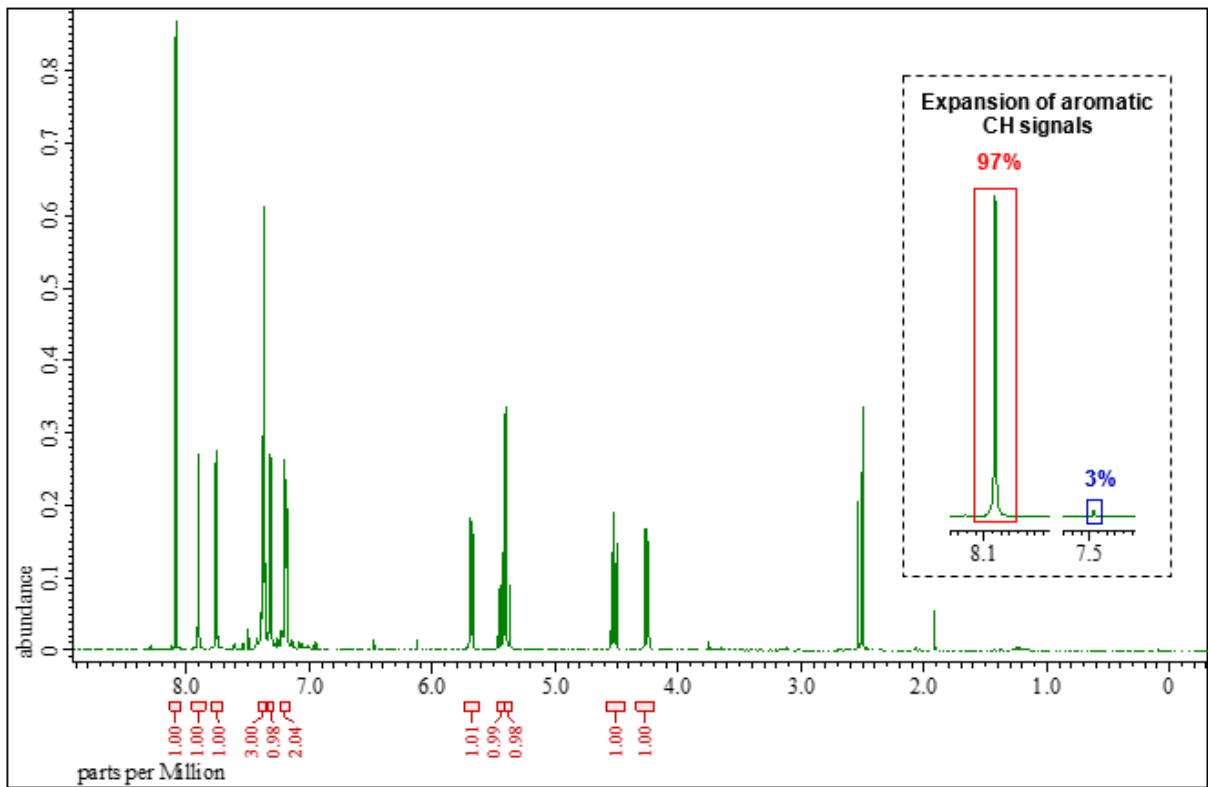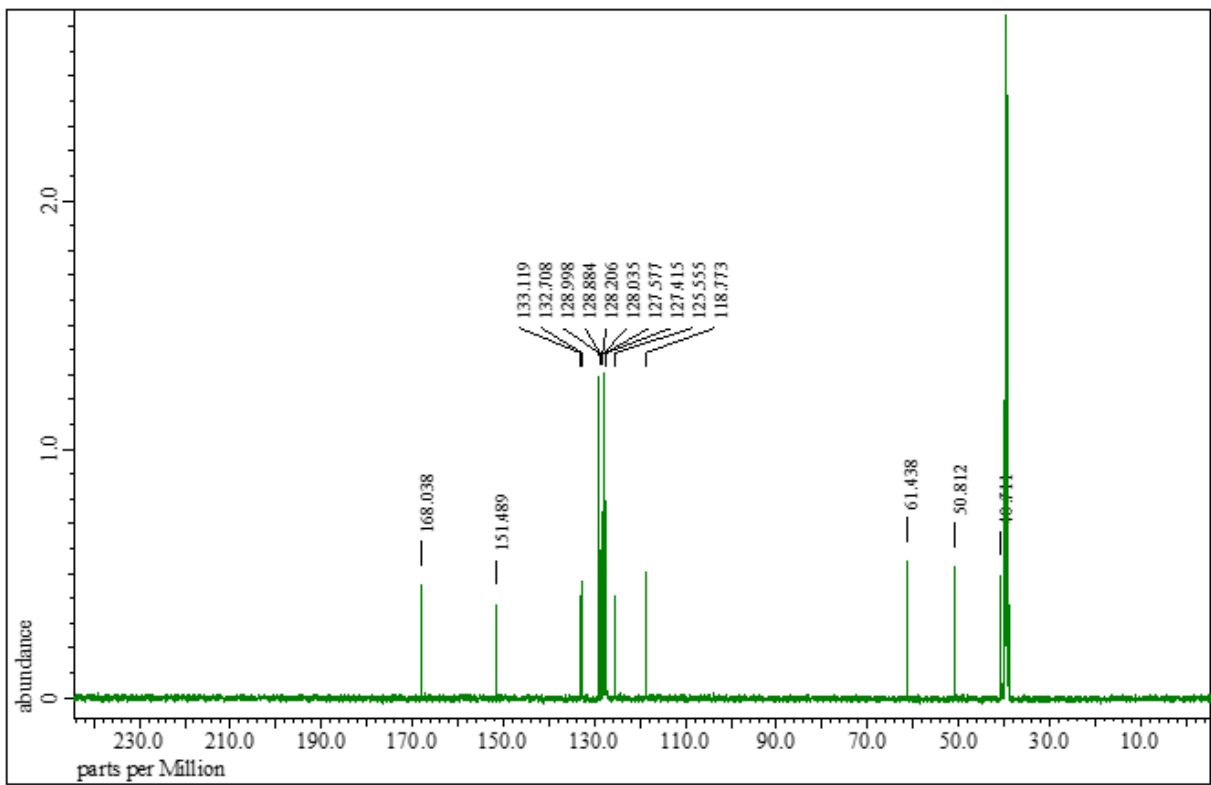

**2-(3-benzyl-4-(thiophen-3-yl)-2-thioxo-2,3-dihydro-1H-imidazol-1-yl)acrylic acid **9**{7,2}**

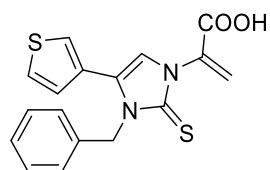

NMR purity 99%, yield quantitative (calculated from **8**{7,2}).  $^1\text{H}$  NMR (500 MHz,  $\text{DMSO-}d_6$ ):  $\delta$  = 13.03 (br. s, 1H), 7.61 (dd,  $J$  = 5.0, 2.9 Hz, 1H), 7.54 (dd,  $J$  = 2.9, 1.3 Hz, 1H), 7.48 (s, 1H), 7.25-7.30 (m, 2H), 7.20-7.24 (m, 1H), 7.14 (dd,  $J$  = 5.0, 1.3 Hz, 1H), 7.05-7.08 (m, 2H), 6.46 (d,  $J$  = 0.7 Hz, 1H), 6.12 (d,  $J$  = 0.7 Hz, 1H), 5.46 (s, 2H).  $^{13}\text{C}$  NMR (126 MHz,  $\text{DMSO-}d_6$ ):  $\delta$  = 164.27, 163.08, 136.85, 136.40, 128.40, 127.82, 127.27, 127.20, 127.17, 126.36, 125.78, 125.23, 124.11, 117.18, 48.06. HRMS (ESI-TOF, pos.):  $m/z$  calcd for  $\text{C}_{17}\text{H}_{15}\text{N}_2\text{O}_2\text{S}_2$   $[\text{M}+\text{H}]^+$  343.0569, found 343.0571.

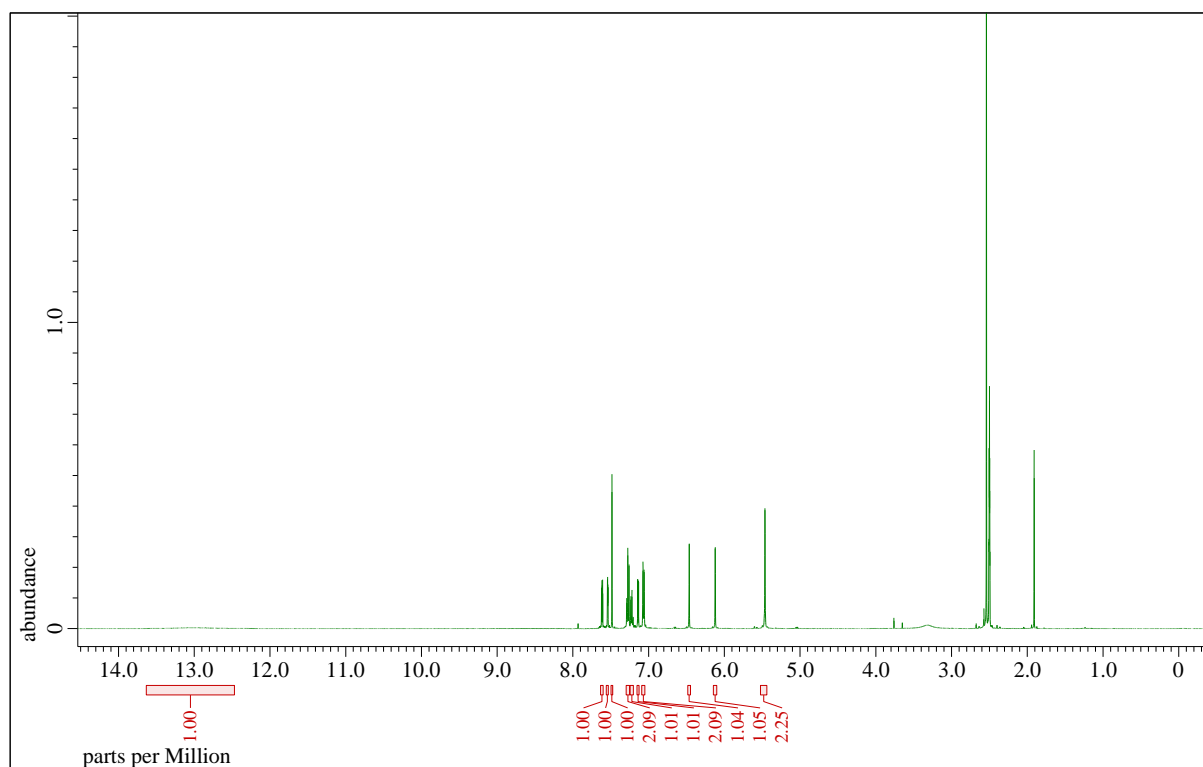

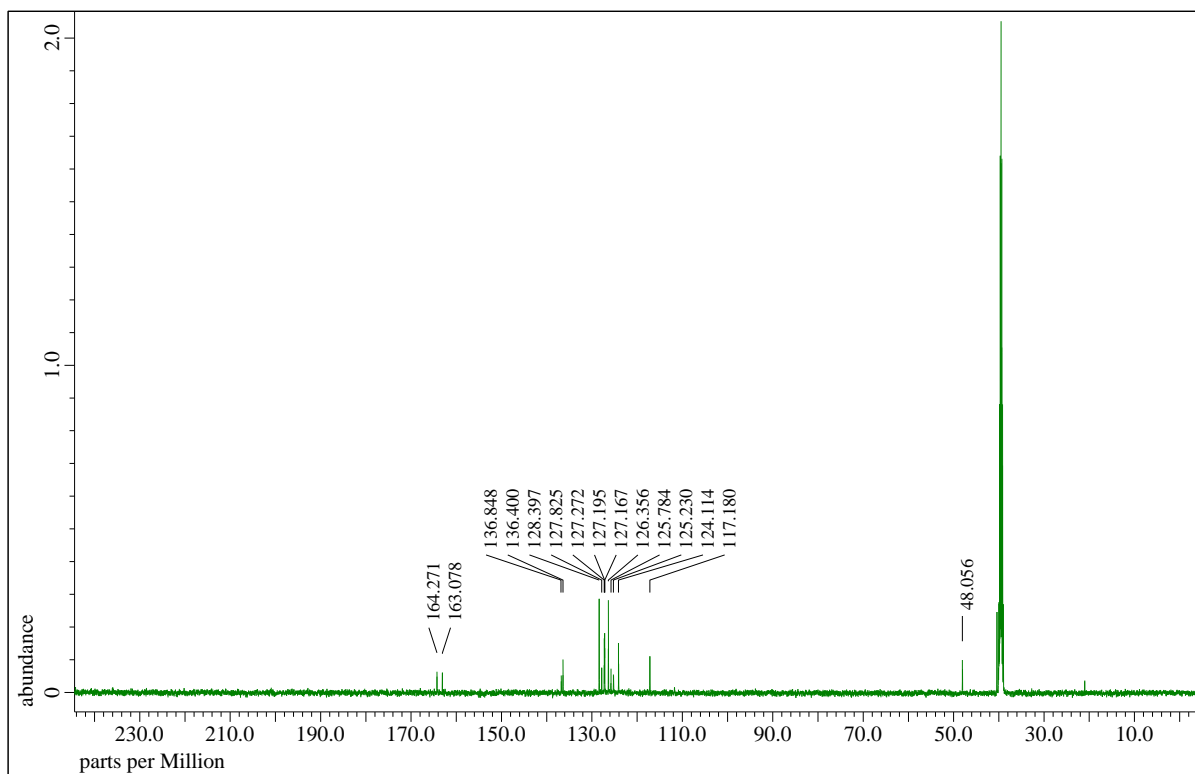

**(3R)-7-allyl-6-(thiophen-3-yl)-2,3-dihydroimidazo[2,1-b]thiazol-7-ium-3-carboxylate 8{7,3}**

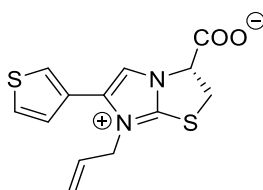

NMR: Mixture with 11% of **9**{7,3}. Creme amorphous solid, 16.9 mg (24.3%, 0.058 mmol) of which **8** 16.7 mg (24%, 0.057 mmol) and **9** 0.2 mg (0.3%, 0.0006 mmol). Cleaved from 433.5 mg of resin **2**{7,3} (0.556 mmol/g, 0.241 mmol of substrate). HPLC purity 98%. <sup>1</sup>H NMR (500 MHz, DMSO-*d*<sub>6</sub>):  $\delta$  = 7.97 (s, 1H), 7.86 (dd, *J* = 2.9, 1.4 Hz, 1H), 7.77 (dd, *J* = 5.0, 2.9 Hz, 1H), 7.34 (dd, *J* = 5.0, 1.4 Hz, 1H), 5.90-5.99 (m, 1H), 5.33 (br. d, *J* = 10.4 Hz, 1H), 5.13 (br. d, *J* = 17.2 Hz, 1H), 4.98 (dd, *J* = 8.5, 5.8 Hz, 1H), 4.70-4.74 (m, 2H), 4.34 (dd, *J* = 11.1, 8.5 Hz, 1H), 4.27 (dd, *J* = 11.1, 5.8 Hz, 1H). <sup>13</sup>C NMR (126 MHz, DMSO-*d*<sub>6</sub>):  $\delta$  = 165.66, 149.75, 131.98, 130.23, 127.98, 127.37, 126.17, 126.04, 119.41, 118.94, 64.06, 49.22, 41.62. HRMS (ESI-TOF, pos.): *m/z* calcd for C<sub>13</sub>H<sub>13</sub>N<sub>2</sub>O<sub>2</sub>S<sub>2</sub> [M+H]<sup>+</sup> 293.0413, found 293.0413.

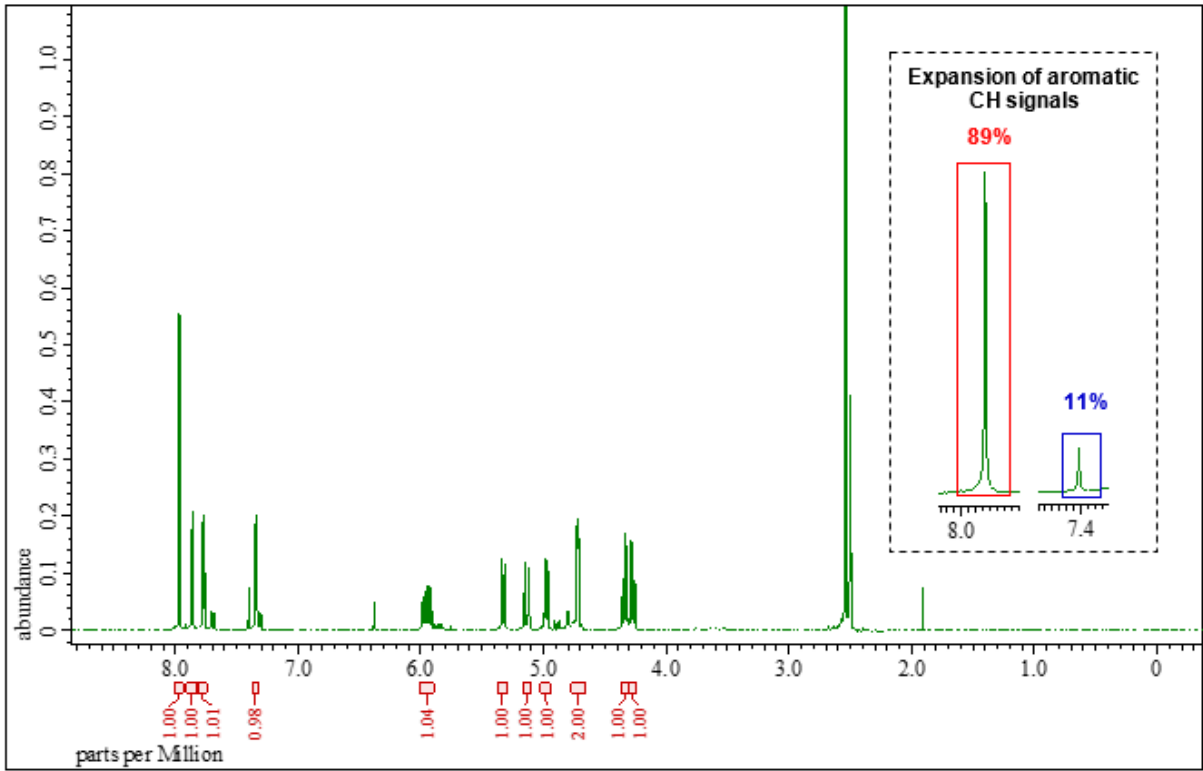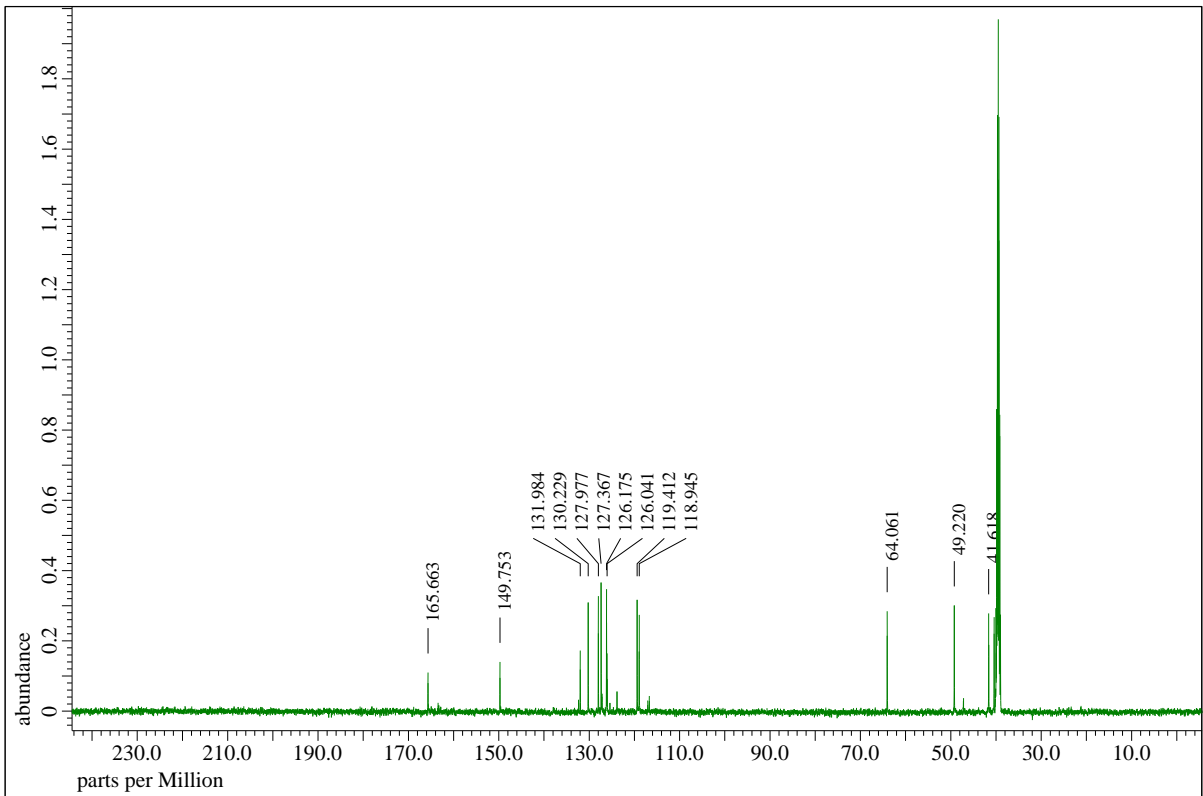

**2-(3-allyl-4-(thiophen-3-yl)-2-thioxo-2,3-dihydro-1H-imidazol-1-yl)acrylic acid **9**{7,3}**

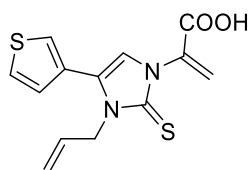

NMR purity 99%, yield quantitative (calculated from **8**{7,3}).  $^1\text{H}$  NMR (500 MHz,  $\text{DMSO-}d_6$ ):  $\delta$  = 13.24 (br. s, 1H), 7.72 (dd,  $J$  = 2.9, 1.4 Hz, 1H), 7.69 (dd,  $J$  = 5.0, 2.9 Hz, 1H), 7.44 (s, 1H), 7.31 (dd,  $J$  = 5.0, 1.4 Hz, 1H), 6.44 (d,  $J$  = 0.7 Hz, 1H), 6.07 (d,  $J$  = 0.7 Hz, 1H), 5.82-5.90 (m, 1H), 5.13 (br. d,  $J$  = 10.5 Hz, 1H), 4.89 (br. d,  $J$  = 17.2 Hz, 1H), 4.79 (ddd,  $J$  = 4.7, 1.8, 1.8 Hz, 2H).  $^{13}\text{C}$  NMR (126 MHz,  $\text{DMSO-}d_6$ ):  $\delta$  = 163.61, 163.07, 136.59, 132.23, 127.82, 127.39, 127.23, 125.81, 125.25, 124.09, 116.81, 116.74, 47.18. HRMS (ESI-TOF, pos.):  $m/z$  calcd for  $\text{C}_{13}\text{H}_{13}\text{N}_2\text{O}_2\text{S}_2$   $[\text{M}+\text{H}]^+$  293.0413, found 293.0413.

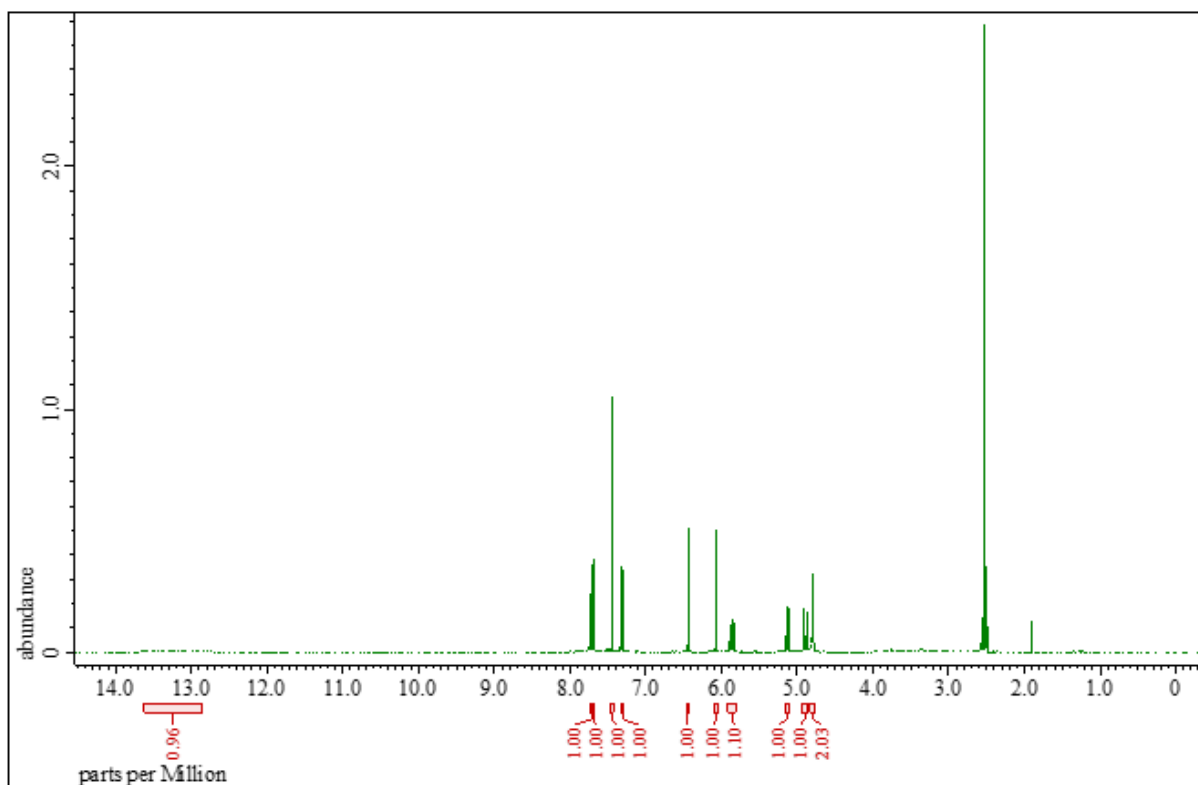

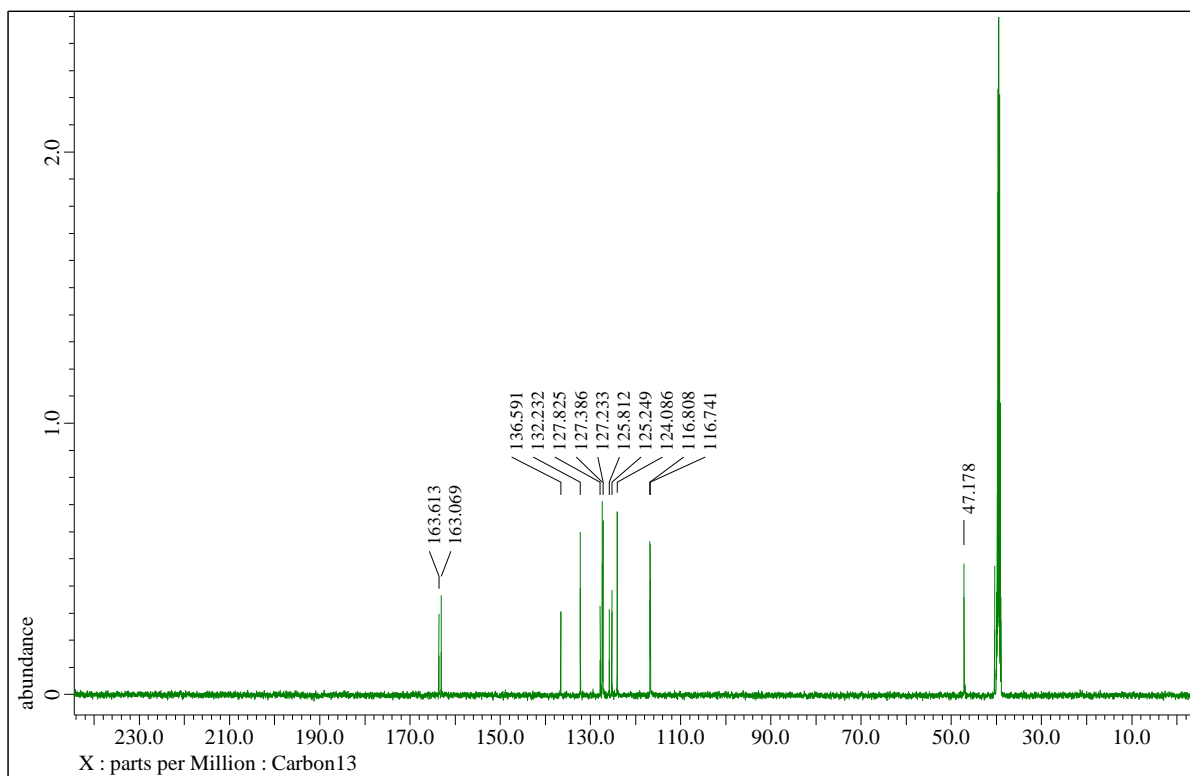

**(3R)-7-(2-morpholinoethyl)-6-(thiophen-3-yl)-2,3-dihydroimidazo[2,1-b]thiazol-7-ium-3-carboxylate **8**{7,6}**

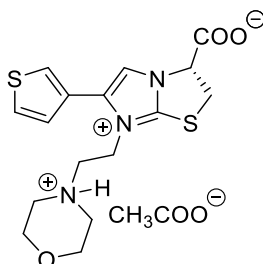

NMR: Mixture with 18% of **9**{7,6}. Creme amorphous solid, 27.3 mg (39%, 0.075 mmol) of which **8** 24.4 mg (33%, 0.067 mmol) and **9** 4.3 mg (6%, 0.012 mmol). Cleaved from 186.1 mg of resin **2**{7,6} (0.556 mmol/g, 0.103 mmol of substrate). HPLC purity 98%. <sup>1</sup>H NMR (500 MHz, DMSO-*d*<sub>6</sub>):  $\delta$  = 7.93 (dd, *J* = 2.8, 1.3 Hz, 1H), 7.89 (s, 1H), 7.78 (dd, *J* = 5.0, 2.8 Hz, 1H), 7.38 (dd, *J* = 5.0, 1.3 Hz, 1H), 5.03 (dd, *J* = 8.4, 5.9 Hz, 1H), 4.33 (dd, *J* = 11.1, 8.4 Hz, 1H), 4.24 (dd, *J* = 11.1, 5.9 Hz, 1H), 4.14 (t, *J* = 5.5 Hz, 2H), 3.52 (t, *J* = 4.5 Hz, 4H), 2.51-2.47 (m, 2H), 2.26-2.32 (m, 4H). <sup>13</sup>C NMR (126 MHz, DMSO-*d*<sub>6</sub>):  $\delta$  = 166.69, 150.35, 132.06, 128.10, 127.74, 126.73, 126.34, 118.90, 65.97, 64.00, 56.15, 53.24, 45.20, 41.33. HRMS (ESI-TOF, pos.): *m/z* calcd for C<sub>16</sub>H<sub>21</sub>N<sub>3</sub>O<sub>3</sub>S<sub>2</sub> [M+H]<sup>+</sup> 366.0941, found 366.0936.



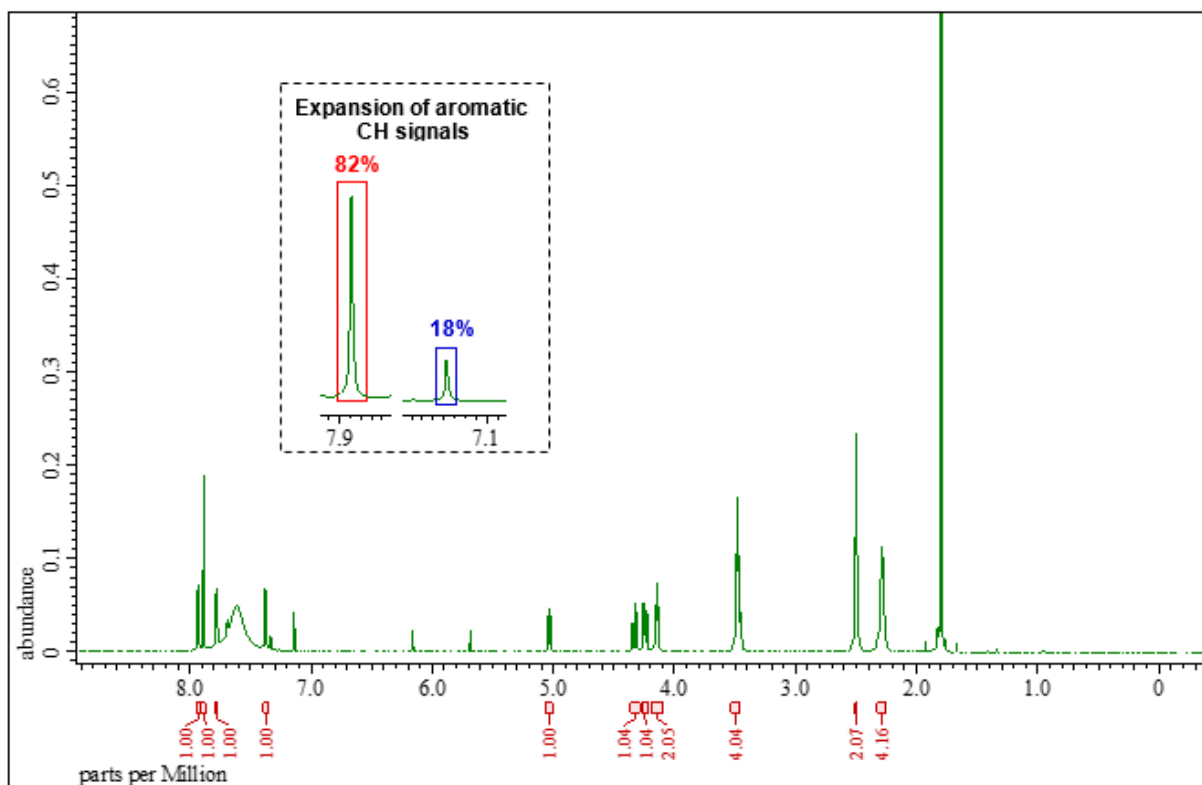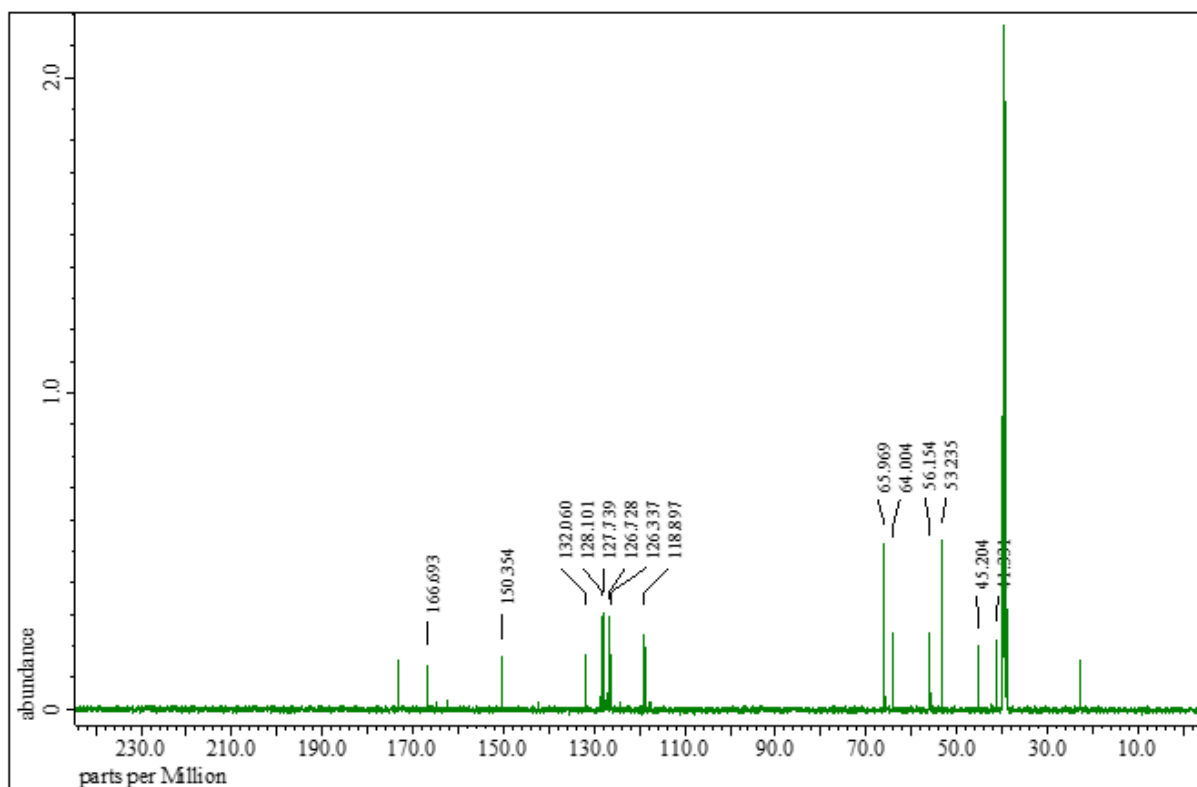

Supplement: s001 [file molecules-23-00976-s001.pdf]
